# Supplementary material for: Participation of Candida albicans Transcription Factor RLM1 in Cell Wall Biogenesis and Virulence
Source: PLoS One. 2014 Jan 23;9(1):e86270. doi: 10.1371/journal.pone.0086270 (PMC3900518; doi:10.1371/journal.pone.0086270)
Supplement: Dataset S1 — Microarray data of the genes differentially expressed in the mutant in comparison with the wild-type strain. (XLSX) [file pone.0086270.s001.xlsx]

## Sheet: YPD_ttest_pvalue 0.05
Original row	Unique id	Systematic name	Gene name	Chromosome	Start Coordinate	Description	Name of S. cerevisiae ortholog(s) (multiples separated by |)	Gene mean	Gene std.dev.	t value	Raw p value	False Discovery Rate	YPD	YPD_ds
5	CUST_8587_PI362308700	orf19.3329	0	Ca21chr1_C_albicans_SC5314	276963	Predicted ORF in Assemblies 19, 20 and 21	LCB3	-0.690737	0.00799222	122.225	0.00520847	0.751245	-0.696389	-0.685086
23	CUST_12170_PI362308700	orf19.6874	0	Ca21chr2_C_albicans_SC5314	1150098	Predicted ORF in Assemblies 19, 20 and 21	BAS1	1.02379	0.0608913	23.7778	0.0267579	0.798181	0.980736	1.06685
54	CUST_7294_PI362308700	orf19.715	0	Ca21chrR_C_albicans_SC5314	1390665	Predicted ORF in Assemblies 19, 20 and 21	0	1.60926	0.118218	19.2512	0.0330394	0.78806	1.52567	1.69285
74	CUST_6697_PI362308700	orf19.5228	RIB3	Ca21chr1_C_albicans_SC5314	2694636	3,4-Dihydroxy-2-butanone 4-phosphate synthase; homodimeric enzyme of riboflavin biosynthesis; converts ribulose 5-phosphate to L-3,4-dihydroxy-2-butanone 4-phosphate; transcription regulated on yeast-hyphal switch, macrophage interaction	RIB3	-1.17894	0.0251017	66.4208	0.00958392	0.743664	-1.16119	-1.19669
78	CUST_2561_PI362308700	orf19.1228	HAP2	Ca21chr1_C_albicans_SC5314	1668206	CCAAT-binding factor regulates low-iron (chelation) induction of FRP1 transcription, and under these conditions CBF comprises Hap43p and probably Hap2p and Hap3p; possibly an essential gene, disruptants not obtained by UAU1 method	HAP2	1.57809	0.107748	20.7127	0.0307119	0.786069	1.5019	1.65428
105	CUST_6077_PI362308700	orf19.4712	FGR6-3	Ca21chr1_C_albicans_SC5314	1691374	Protein lacking an ortholog in S. cerevisiae; member of a family encoded by FGR6-related genes in the RB2 repeat sequence; transposon mutation affects filamentous growth	0	0.220281	0.01813	17.1828	0.0370081	0.80021	0.207461	0.233101
127	CUST_8027_PI362308700	orf19.4815	YTM1	Ca21chr1_C_albicans_SC5314	2093301	Protein similar to S. cerevisiae Ytm1p, which is involved in biogenesis of the large ribosomal subunit; transposon mutation affects filamentous growth; protein level decreased in stationary phase cultures	YTM1	1.09396	0.119068	12.9933	0.0488997	0.789869	1.00976	1.17815
128	CUST_7016_PI362308700	orf19.5334	0	Ca21chr2_C_albicans_SC5314	2180422	Predicted ORF in Assemblies 19, 20 and 21; transcription regulated upon yeast-hyphal switch	TIS11	0.900062	0.0641351	19.8469	0.0320495	0.793792	0.945413	0.854712
140	CUST_4992_PI362308700	orf19.5163	SFI1	Ca21chr7_C_albicans_SC5314	647745	Predicted ORF in Assemblies 19, 20 and 21; transcription is induced in response to alpha pheromone in SpiderM medium; essential for growth	SFI1	0.798695	0.0336166	33.6002	0.0189413	0.820567	0.822466	0.774925
187	CUST_6473_PI362308700	orf19.7537	BNR1	Ca21chrR_C_albicans_SC5314	16909	Formin; probable role in hyphal cytoskeletal polarity; synthetic lethality if Bnr1p and Bni1p are absent	BNI1	0.335517	0.0236204	20.0883	0.031665	0.790657	0.352219	0.318815
212	CUST_4672_PI362308700	orf19.6336	PGA25	Ca21chr6_C_albicans_SC5314	9900	Putative GPI-anchored protein of unknown function; fluconazole-downregulated	0	2.99922	0.134415	31.5556	0.0201678	0.797604	3.09426	2.90417
240	CUST_12_PI362308700	orf19.2565	0	Ca21chrR_C_albicans_SC5314	391753	Predicted ORF in Assemblies 19, 20 and 21	MDM1	-0.214051	0.00620789	48.7628	0.0130536	0.780669	-0.218441	-0.209662
268	CUST_8551_PI362308700	orf19.1158	0	Ca21chr1_C_albicans_SC5314	2550177	Predicted ORF in Assemblies 19, 20 and 21	0	-0.281561	0.0124298	32.0349	0.0198663	0.806492	-0.272772	-0.29035
305	CUST_7791_PI362308700	orf19.2183	KRE30	Ca21chr2_C_albicans_SC5314	1623732	YEF3-subfamily ABC family protein, predicted not to be a transporter; downregulated during core stress response; mutation confers hypersensitivity to amphotericin B	ARB1	0.44639	0.0144646	43.6438	0.0145842	0.809058	0.456618	0.436162
349	CUST_7188_PI362308700	orf19.3475	0	Ca21chr6_C_albicans_SC5314	486570	Described as a Gag-related protein; hyphal induced; downregulation correlates with clinical development of fluconazole resistance; repressed by nitric oxide, 17-beta-estradiol, ethynyl estradiol	0	1.05873	0.0720853	20.7708	0.0306261	0.787162	1.1097	1.00776
357	CUST_8262_PI362308700	orf19.4516	0	Ca21chr2_C_albicans_SC5314	917707	Predicted ORF in Assemblies 19, 20 and 21	MET7	-1.01316	0.00287332	498.664	0.00127665	0.823775	-1.01519	-1.01112
485	CUST_7178_PI362308700	orf19.3478	NIP7	Ca21chr6_C_albicans_SC5314	493633	Protein described as a nucleolar protein with role in ribosomal assembly; hyphal induced	NIP7	0.888337	0.0243362	51.6227	0.0123306	0.79565	0.905546	0.871129
501	CUST_4000_PI362308700	orf19.475	0	Ca21chrR_C_albicans_SC5314	894751	Predicted ORF in Assemblies 19, 20 and 21	IPI1	-0.202597	0.0199776	14.3419	0.0443172	0.79667	-0.188471	-0.216724
529	CUST_3887_PI362308700	orf19.2721	0	Ca21chr4_C_albicans_SC5314	580529	Predicted ORF in Assemblies 19, 20 and 21	CDC123	-0.439045	0.0486562	12.761	0.049786	0.78962	-0.47345	-0.40464
570	CUST_4500_PI362308700	orf19.6396	0	Ca21chrR_C_albicans_SC5314	1800743	Putative patatin-like phospholipase; similar to S. cerevisiae Yml059p, which is predicted to be a membrane protein: antigenic during human oral infection	NTE1	-0.731211	0.0535764	19.3012	0.032954	0.787556	-0.693327	-0.769095
573	CUST_5721_PI362308700	orf19.2423	ZCF11	Ca21chrR_C_albicans_SC5314	697519	Putative DNA-binding transcription factor with a zinc cluster domain, required for wild-type filamentous growth; mRNA binds to She3p	YBR239C	-0.201197	0.0104694	27.1778	0.0234137	0.806327	-0.2086	-0.193794
588	CUST_11940_PI362308700	orf19.7111	0	Ca21chr7_C_albicans_SC5314	16744	Predicted ORF in Assemblies 19, 20 and 21; possibly an essential gene, disruptants not obtained by UAU1 method	FIS1	-0.85751	0.00401031	302.396	0.00210525	0.890011	-0.854674	-0.860345
592	CUST_11196_PI362308700	orf19.1358	GCN4	Ca21chr2_C_albicans_SC5314	2031301	Transcriptional activator of general amino acid control response; required for Efg1p-dependent pseudohyphal filament induction by amino acid starvation but not by serum; upregulated in the presence of human whole blood or PMN cells	GCN4	-0.8784	0.0043893	283.017	0.0022494	0.811106	-0.875297	-0.881504
602	CUST_6726_PI362308700	orf19.6438	0	Ca21chrR_C_albicans_SC5314	1861426	Predicted ORF in Assemblies 19, 20 and 21	LCB1	0.412559	0.0183449	31.8044	0.0200101	0.796507	0.399588	0.425531
607	CUST_9244_PI362308700	orf19.7433	0	Ca21chr3_C_albicans_SC5314	1463643	Predicted ORF in Assemblies 19, 20 and 21	NUP116	-0.543724	0.055549	13.8426	0.0459102	0.796124	-0.504445	-0.583003
613	CUST_8303_PI362308700	orf19.3980	0	Ca21chr5_C_albicans_SC5314	1073719	Predicted ORF in Assemblies 19, 20 and 21	SLH1	-0.295096	0.0267693	15.5898	0.0407797	0.799936	-0.314025	-0.276167
621	CUST_9900_PI362308700	orf19.4934	OP4	Ca21chr1_C_albicans_SC5314	2848705	Ala- Leu- and Ser-rich protein; N-terminal hydrophobic region; possible glycosylation; gene is transcribed specifically in opaque-phase cells, repressed by alpha pheromone in opaque MTLa homozygotes	0	0.628746	0.0352234	25.2441	0.0252054	0.790328	0.603839	0.653653
625	CUST_1058_PI362308700	orf19.1926	SEF2	Ca21chr5_C_albicans_SC5314	313356	Putative zinc cluster protein, required for normal resistance to copper; expression is repressed by Sfu1p under high-iron conditions	SEF1	0.795344	0.0208263	54.0079	0.0117862	0.807255	0.81007	0.780617
628	CUST_9221_PI362308700	orf19.337	0	Ca21chr3_C_albicans_SC5314	718562	Predicted ORF in Assemblies 19, 20 and 21	VTI1	-0.139077	0.00258866	75.9796	0.00837835	0.733704	-0.140908	-0.137247
630	CUST_10716_PI362308700	orf19.6640	TPS1	Ca21chrR_C_albicans_SC5314	1213719	Trehalose-6-phosphate synthase; role in hyphal growth and virulence in mouse systemic infection; upregulated in presence of human neutrophils; macrophage/pseudohyphal-repressed after 16h; detected by mass spec in stationary phase cultures	TPS1	-1.2031	0.123874	13.7352	0.0462678	0.793347	-1.1155	-1.29069
638	CUST_708_PI362308700	orf19.5628	0	Ca21chr6_C_albicans_SC5314	714650	Predicted ORF in Assemblies 19, 20 and 21; possibly an essential gene, disruptants not obtained by UAU1 method	DIC1	-1.15419	0.0236714	68.9554	0.00923169	0.759601	-1.13745	-1.17093
655	CUST_2168_PI362308700	orf19.2875	0	Ca21chr4_C_albicans_SC5314	1472576	Predicted ORF in Assemblies 19, 20 and 21	SEC63	0.909675	0.0618223	20.8092	0.0305697	0.789019	0.865959	0.95339
666	CUST_4580_PI362308700	orf19.4185	0	Ca21chr4_C_albicans_SC5314	100986	Predicted ORF in Assemblies 19, 20 and 21	YCH1	-1.10791	0.00122968	1274.17	0.000499635	0.76569	-1.10878	-1.10704
682	CUST_1720_PI362308700	orf19.286	0	Ca21chr3_C_albicans_SC5314	626060	Decreased transcription is observed upon fluphenazine treatment; possibly spurious ORF (Annotation Working Group prediction)	0	0.901653	0.0894155	14.2607	0.0445685	0.793047	0.838427	0.96488
707	CUST_84_PI362308700	orf19.6060	GCN20	Ca21chr1_C_albicans_SC5314	77829	YEF3-subfamily ABC family protein, predicted not to be a transporter	GCN20	0.208605	0.0192363	15.3363	0.0414521	0.794066	0.222207	0.195003
709	CUST_9642_PI362308700	orf19.6821	0	Ca21chr3_C_albicans_SC5314	1552317	Predicted ORF in Assemblies 19, 20 and 21	APC2	-0.267677	0.0053241	71.1018	0.00895305	0.746696	-0.271442	-0.263912
719	CUST_3247_PI362308700	orf19.1938	0	Ca21chr5_C_albicans_SC5314	293764	Decreased transcription is observed in an azole-resistant strain that overexpresses CDR1 and CDR2; increased transcription is observed upon benomyl treatment	0	-0.187833	0.00602851	44.0633	0.0144454	0.805002	-0.192096	-0.18357
721	CUST_9090_PI362308700	orf19.7459	0	Ca21chr3_C_albicans_SC5314	1529426	Predicted ORF in Assemblies 19, 20 and 21; fluconazole-induced; ketoconazole-repressed	YBR238C	-0.481933	0.0396203	17.2022	0.0369664	0.80072	-0.453918	-0.509949
734	CUST_9834_PI362308700	orf19.5880	0	Ca21chr3_C_albicans_SC5314	905227	Predicted ORF in Assemblies 19, 20 and 21	GEF1	-0.809139	0.0119511	95.748	0.00664867	0.776311	-0.81759	-0.800688
758	CUST_5152_PI362308700	orf19.1446	CLB2	Ca21chr2_C_albicans_SC5314	250508	B-type mitotic cyclin (cyclin-dependent protein kinase regulatory subunit); essential; required for wild-type mitotic exit; role in cell polarization; interacts with catalytic subunit Cdk1p	CLB2	-0.841705	0.00983256	121.062	0.00525851	0.749643	-0.848657	-0.834752
774	CUST_11546_PI362308700	orf19.3269	GSL2	Ca21chrR_C_albicans_SC5314	197102	Protein similar to beta-1,3-glucan synthase; 16 predicted membrane-spanning regions; transcription regulated by Nrg1p; very low gene expression in yeast-form and hyphal cells	GSC2	-0.598558	0.0389244	21.747	0.0292533	0.791711	-0.626082	-0.571035
785	CUST_11058_PI362308700	orf19.3556	0	Ca21chr2_C_albicans_SC5314	1086748	Predicted ORF in Assemblies 19, 20 and 21	KAP104	0.740875	0.0713851	14.6775	0.0433069	0.790092	0.791352	0.690398
788	CUST_9497_PI362308700	orf19.6853	0	Ca21chr1_C_albicans_SC5314	948645	Predicted ORF in Assemblies 19, 20 and 21	0	0.663764	0.0168027	55.8662	0.0113942	0.807475	0.675645	0.651883
796	CUST_5170_PI362308700	orf19.3615	0	Ca21chr2_C_albicans_SC5314	1753971	Predicted ORF in Assemblies 19, 20 and 21; induced in core caspofungin response; increased expression observed in an ssr1 homozygous null mutant; induced by nitric oxide in yhb1 mutant	YGL082W	-1.44359	0.133659	15.2743	0.0416197	0.794793	-1.5381	-1.34908
822	CUST_7156_PI362308700	orf19.733	0	Ca21chrR_C_albicans_SC5314	1561994	Predicted ORF in Assemblies 19, 20 and 21	YBR287W	0.565581	0.0246074	32.5046	0.0195794	0.813705	0.582981	0.548181
825	CUST_6517_PI362308700	orf19.3170	0	Ca21chr5_C_albicans_SC5314	453568	Predicted ORF in Assemblies 19, 20 and 21	BUD27	0.509537	0.0234343	30.7495	0.0206961	0.795405	0.492966	0.526107
840	CUST_4553_PI362308700	orf19.4190	0	Ca21chr4_C_albicans_SC5314	90450	Predicted ORF in Assemblies 19, 20 and 21	PAM18	0.380172	0.0204176	26.3325	0.0241646	0.787921	0.365735	0.39461
844	CUST_1638_PI362308700	orf19.6169	0	Ca21chr3_C_albicans_SC5314	187467	Predicted ORF in Assemblies 19, 20 and 21; induced by Rgt1p	ATO2	2.21673	0.109074	28.7414	0.022141	0.805485	2.29386	2.1396
852	CUST_8346_PI362308700	orf19.7092	0	Ca21chr7_C_albicans_SC5314	46309	Predicted ORF in Assemblies 19, 20 and 21	YLR290C	0.694666	0.0193647	50.7319	0.0125471	0.784833	0.708359	0.680973
867	CUST_5120_PI362308700	orf19.5805	DLD1	Ca21chr2_C_albicans_SC5314	597148	Putative D-lactate dehydrogenase; transcription is specific to white cell type; shows colony morphology-related gene regulation by Ssn6p; transcription is upregulated in both intermediate and mature biofilms	DLD1	-1.34272	0.10244	18.5368	0.0343104	0.787725	-1.27029	-1.41516
894	CUST_256_PI362308700	orf19.5499	0	Ca21chr2_C_albicans_SC5314	1299340	Predicted ORF in Assemblies 19, 20 and 21	0	-0.042144	0.0037029	16.0957	0.0395015	0.803132	-0.0395256	-0.0447623
906	CUST_8807_PI362308700	orf19.4407	0	Ca21chr4_C_albicans_SC5314	1327013	Predicted ORF in Assemblies 19, 20 and 21	0	-0.47616	0.0246309	27.3393	0.0232755	0.808378	-0.458744	-0.493577
909	CUST_11809_PI362308700	orf19.3821	0	Ca21chr4_C_albicans_SC5314	990508	Predicted ORF in Assemblies 19, 20 and 21; possibly spurious ORF (Annotation Working Group prediction)	0	-0.250943	0.015014	23.637	0.0269172	0.79328	-0.240326	-0.261559
915	CUST_8211_PI362308700	orf19.6705	0	Ca21chr7_C_albicans_SC5314	771047	Putative guanyl nucleotide exchange factor with Sec7 domain, required for normal filamentous growth; transcriptionally regulated upon yeast-hyphal switch; filament induced; regulated by Nrg1p, Tup1p, Mob2p; mRNA binds to She3p	YEL1	1.60317	0.0792095	28.6232	0.0222323	0.801672	1.65918	1.54716
938	CUST_8511_PI362308700	orf19.1162	0	Ca21chr1_C_albicans_SC5314	2541437	Predicted ORF in Assemblies 19, 20 and 21; increased transcription is observed upon benomyl treatment	0	-1.24476	0.012985	135.568	0.00469586	0.7996	-1.23558	-1.25394
946	CUST_6287_PI362308700	orf19.6238	0	Ca21chr1_C_albicans_SC5314	1437711	Predicted ORF in Assemblies 19, 20 and 21	0	-0.50267	0.00927823	76.6184	0.0083085	0.74352	-0.496109	-0.509231
969	CUST_3669_PI362308700	orf19.2575	0	Ca21chrR_C_albicans_SC5314	404543	Predicted ORF in Assemblies 19, 20 and 21	YLR063W	1.38401	0.0606814	32.2551	0.0197307	0.81174	1.3411	1.42692
988	CUST_9574_PI362308700	orf19.2484	0	Ca21chr1_C_albicans_SC5314	1188231	Predicted ORF in Assemblies 19, 20 and 21	YDR415C	-0.639718	0.0661287	13.6809	0.0464509	0.789859	-0.686478	-0.592958
1006	CUST_11843_PI362308700	orf19.1849	0	Ca21chrR_C_albicans_SC5314	1464965	Predicted ORF in Assemblies 19, 20 and 21	YIL091C	-0.634378	0.00503832	178.064	0.00357518	0.827014	-0.630815	-0.63794
1014	CUST_6472_PI362308700	orf19.434	PRD1	Ca21chr1_C_albicans_SC5314	1115479	Transcription is regulated by Nrg1p, Mig1p, and Tup1p; Hog1p-induced	PRD1	-0.684472	0.0369239	26.2158	0.0242721	0.787237	-0.710581	-0.658363
1015	CUST_10956_PI362308700	orf19.7478	0	Ca21chrR_C_albicans_SC5314	134047	Predicted ORF in Assemblies 19, 20 and 21	COQ1	0.510714	0.0469536	15.3824	0.0413281	0.79542	0.477513	0.543915
1031	CUST_2980_PI362308700	orf19.7284	ASR2	Ca21chrR_C_albicans_SC5314	1907965	Gene regulated by cAMP and by osmotic stress; greater mRNA abundance observed in a cyr1 or ras1 homozygous null mutant than in wild type; protein detected by mass spec in stationary phase cultures	0	0.342773	0.00225275	215.183	0.00295848	0.806021	0.34118	0.344366
1064	CUST_4013_PI362308700	orf19.470	0	Ca21chrR_C_albicans_SC5314	888243	Predicted ORF in Assemblies 19, 20 and 21	TAF12	-0.307735	0.000313657	1387.51	0.00045882	0.937523	-0.307957	-0.307514
1079	CUST_9340_PI362308700	orf19.3374	ECE1	Ca21chr4_C_albicans_SC5314	727428	Protein of unknown function; hyphal-specific expression increases with extent of elongation of the cell; regulated by Rfg1p, Nrg1p, Tup1p, Cph1p, Efg1p, Hog1p, farnesol, phagocytosis; may contribute to biofilm formation	0	6.24705	0.154663	57.1221	0.0111438	0.813229	6.35641	6.13768
1083	CUST_8689_PI362308700	orf19.2261	0	Ca21chr2_C_albicans_SC5314	1442849	Predicted ORF in Assemblies 19, 20 and 21	HSH49	-0.832921	0.0461338	25.5329	0.0249206	0.79152	-0.800299	-0.865542
1116	CUST_2390_PI362308700	orf19.3022	0	Ca21chr1_C_albicans_SC5314	685483	Predicted ORF in Assemblies 19, 20 and 21	RSM24	0.636546	0.0705904	12.7526	0.0498188	0.78912	0.586631	0.686461
1118	CUST_4682_PI362308700	orf19.2533.1	0	Ca21chrR_C_albicans_SC5314	344860	ORF Predicted by Annotation Working Group; predicted role in protein translocation from the endoplasmic reticulum	SBH2	0.522946	0.0521363	14.1851	0.0448054	0.794956	0.559812	0.48608
1124	CUST_7851_PI362308700	orf19.6527	0	Ca21chr7_C_albicans_SC5314	416612	Predicted ORF in Assemblies 19, 20 and 21; shows colony morphology-related gene regulation by Ssn6p; transcriptionally activated by Mnl1p under weak acid stress; possibly an essential gene, disruptants not obtained by UAU1 method	PRM10	-0.339239	0.0178714	26.8449	0.0237038	0.807246	-0.326602	-0.351876
1129	CUST_4908_PI362308700	orf19.3391	ADK1	Ca21chr6_C_albicans_SC5314	393777	Putative adenylate kinase; decreased expression in hyphae compared to yeast-form; macrophage-induced protein; adenylate kinase release used as a marker for cell lysis; possibly an essential gene, disruptants not obtained by UAU1 method	ADK1	-0.397717	0.0169459	33.1914	0.0191744	0.816245	-0.385735	-0.4097
1138	CUST_9328_PI362308700	orf19.5552	0	Ca21chr6_C_albicans_SC5314	575657	Predicted ORF in Assemblies 19, 20 and 21	CRT10	0.266242	0.0115797	32.5157	0.0195727	0.816194	0.27443	0.258054
1158	CUST_7500_PI362308700	orf19.6511	LIG1	Ca21chr7_C_albicans_SC5314	458226	tRNA ligase; functional homolog of S. cerevisiae Trl1p; fungal-specific (no human or murine homolog)	TRL1	-0.913383	0.0810622	15.9349	0.0398989	0.796679	-0.970703	-0.856064
1198	CUST_11928_PI362308700	orf19.1816	ALS3	Ca21chrR_C_albicans_SC5314	1535813	Adhesin; ALS family; role in epithelial adhesion, endothelial invasiveness; allelic variation in adhesiveness; immunoprotective in mice; promotes biofilm formation via binding to the SspB adhesin of S. gordonii	SAG1	3.81639	0.274558	19.6577	0.0323573	0.788669	3.62225	4.01053
1209	CUST_4977_PI362308700	orf19.7341	0	Ca21chrR_C_albicans_SC5314	2007958	Predicted ORF in Assemblies 19, 20 and 21; ketoconazole-repressed	0	0.457143	0.0121417	53.2461	0.0119548	0.805305	0.465728	0.448557
1242	CUST_7409_PI362308700	orf19.3757	ATP20	Ca21chr1_C_albicans_SC5314	2746930	Predicted ORF in Assemblies 19, 20 and 21; shows colony morphology-related gene regulation by Ssn6p; flucytosine induced; caspofungin repressed; macrophage/pseudohyphal-induced	ATP20	0.665825	0.0284203	33.1319	0.0192089	0.814881	0.645729	0.685921
1259	CUST_1437_PI362308700	orf19.6474	0	Ca21chr7_C_albicans_SC5314	517537	Predicted ORF in Assemblies 19, 20 and 21	0	0.143637	0.0131559	15.4405	0.0411731	0.798706	0.134334	0.15294
1309	CUST_6276_PI362308700	orf19.4064	GPI7	Ca21chr1_C_albicans_SC5314	1061940	Protein involved in attachment of GPI-linked proteins to cell wall; member of major facilitator superfamily; phosphodiesterase/nucleotide pyrophosphatase domain; similar to S. cerevisiae Gpi7p	LAS21	0.813276	0.00543534	211.605	0.0030085	0.784772	0.817119	0.809433
1343	CUST_3458_PI362308700	orf19.3675	GAL7	Ca21chr1_C_albicans_SC5314	456773	Predicted ORF in Assemblies 19, 20 and 21; macrophage/pseudohyphal-repressed	GAL7	1.99223	0.02251	125.164	0.00508618	0.769834	2.00814	1.97631
1356	CUST_10816_PI362308700	orf19.4445	0	Ca21chr1_C_albicans_SC5314	1549838	Putative protein of unknown function; Plc1p-regulated; expression is upregulated early upon infection of reconstituted human epithelium (RHE), while expression of the C. dubliniensis ortholog is not upregulated; not required for viability	0	-0.427271	0.0327796	18.4338	0.0345016	0.790635	-0.404093	-0.45045
1401	CUST_12109_PI362308700	orf19.5110	OPY2	Ca21chr1_C_albicans_SC5314	1823851	Predicted ORF in Assemblies 19, 20 and 21	OPY2	1.36149	0.0691127	27.8594	0.0228413	0.8001	1.31262	1.41036
1407	CUST_5481_PI362308700	orf19.7166	0	Ca21chr7_C_albicans_SC5314	888621	Predicted ORF in Assemblies 19, 20 and 21; increased transcription is observed in an azole-resistant strain that overexpresses MDR1; transcriptionally activated by Mnl1p under weak acid stress	CLD1	1.37167	0.0251634	77.0899	0.00825768	0.74992	1.35388	1.38947
1416	CUST_7008_PI362308700	orf19.5338	GAL4	Ca21chr2_C_albicans_SC5314	2186699	Transcription factor with zinc cluster DNA-binding motif involved in control of glycolysis; ortholog of S. cerevisiae Gal4p, but not involved in the regulation of galactose utilization genes; caspofungin repressed	GAL4	1.18777	0.127943	13.129	0.0483963	0.786921	1.0973	1.27824
1419	CUST_8808_PI362308700	orf19.4407	0	Ca21chr4_C_albicans_SC5314	1327013	Predicted ORF in Assemblies 19, 20 and 21	0	-1.02023	0.0755635	19.0942	0.0333106	0.788393	-0.9668	-1.07366
1460	CUST_11055_PI362308700	orf19.5730	0	Ca21chr6_C_albicans_SC5314	771412	Predicted ORF in Assemblies 19, 20 and 21; clade-associated gene expression	YDR539W	0.215942	0.0039993	76.3604	0.00833657	0.735297	0.213114	0.21877
1464	CUST_8757_PI362308700	orf19.2248	ARE2	Ca21chr2_C_albicans_SC5314	1424342	Acyl CoA:sterol acyltransferase (ASAT); uses cholesterol and oleoyl-CoA substrates; protoberberine derivative drug inhibits enzyme activity; 7 putative transmembrane regions; ketoconazole-induced	ARE2	-0.584275	0.0391476	21.1071	0.0301389	0.786176	-0.611957	-0.556594
1475	CUST_9597_PI362308700	orf19.4655	OPT6	Ca21chr4_C_albicans_SC5314	270892	Putative oligopeptide transporter; fungal-specific (no human or murine homolog); expression of OPT6, OPT7, or OPT8 does not suppress defect of mutant lacking Opt1p, Opt2p, and Opt3p; alleles are nonidentical	OPT2	1.20757	0.0595235	28.6907	0.0221801	0.802148	1.24966	1.16549
1535	CUST_1187_PI362308700	orf19.5029	MODF	Ca21chr1_C_albicans_SC5314	3065571	Predicted ORF in Assemblies 19, 20 and 21; ABC family protein; similar to E. coli ModF/PhrA protein, which may have a role in molybdate metabolism; no human or murine homolog	YDR061W	-0.259899	0.00813858	45.1618	0.0140941	0.792632	-0.254144	-0.265654
1536	CUST_11654_PI362308700	orf19.3870	ADE13	Ca21chrR_C_albicans_SC5314	1320356	Enzyme of adenine biosynthesis; soluble protein in hyphae; not induced during GCN response, in contrast to the S. cerevisiae ortholog; repressed by nitric oxide	ADE13	0.495718	0.0445572	15.7337	0.0404078	0.801617	0.527224	0.464211
1541	CUST_980_PI362308700	orf19.6591	0	Ca21chrR_C_albicans_SC5314	2066600	Predicted ORF in Assemblies 19, 20 and 21	PCD1	0.876877	0.0388538	31.9169	0.0199397	0.804145	0.849403	0.904351
1561	CUST_3587_PI362308700	orf19.6948	CCC1	Ca21chr3_C_albicans_SC5314	782739	Putative manganese transporter, required for normal filamentous growth; mRNA binds to She3p and is localized to hyphal tips; repressed by nitric oxide and alkaline pH; shows colony morphology-related regulation by Ssn6p	CCC1	1.27591	0.0681251	26.4866	0.0240241	0.796041	1.22774	1.32408
1592	CUST_11261_PI362308700	orf19.3660	0	Ca21chr6_C_albicans_SC5314	119503	Predicted ORF in Assemblies 19, 20 and 21	0	-0.159139	0.014053	16.0149	0.0397002	0.79791	-0.169076	-0.149202
1635	CUST_6374_PI362308700	orf19.5378	SCL1	Ca21chr3_C_albicans_SC5314	145926	Predicted ORF in Assemblies 19, 20 and 21; protein detected by mass spec in exponential and stationary phase cultures	SCL1	-0.0678426	0.00128718	74.538	0.00854036	0.727117	-0.0669324	-0.0687527
1668	CUST_11846_PI362308700	orf19.1847	ARO10	Ca21chrR_C_albicans_SC5314	1469568	Aromatic decarboxylase of the Ehrlich fusel oil pathway of aromatic alcohol biosynthesis; pH-regulated (alkaline downregulated); protein abundance is affected by URA3 expression in the CAI-4 strain background	ARO10	0.90108	0.0252101	50.5479	0.0125927	0.779733	0.918906	0.883254
1671	CUST_6642_PI362308700	orf19.5232	CSI2	Ca21chr1_C_albicans_SC5314	2686695	Protein essential for growth; transposon mutation affects filamentous growth	BRX1	0.813504	0.0451402	25.4866	0.0249658	0.790907	0.845423	0.781585
1698	CUST_4830_PI362308700	orf19.5595	SHE3	Ca21chr6_C_albicans_SC5314	652332	mRNA-binding protein that localizes specific mRNAs to daughter yeast-form cells and to hyphal tips; required for normal filamentous growth and host epithelial cell damage; ortholog of S. cerevisiae She3p but set of target mRNAs differs	0	0.968536	0.0646108	21.1995	0.0300077	0.786099	0.922849	1.01422
1723	CUST_7567_PI362308700	orf19.4318	MIG1	Ca21chr5_C_albicans_SC5314	653658	Transcriptional repressor; regulates genes for utilization of carbon sources; Tup1p-dependent and -independent functions; upregulated in biofilm; hyphal downregulated; caspofungin repressed; functional homolog of S. cerevisiae Mig1p	MIG1	0.239087	0.0183829	18.3932	0.0345776	0.790899	0.226088	0.252085
1725	CUST_3736_PI362308700	orf19.6464	0	Ca21chr7_C_albicans_SC5314	529027	Predicted ORF in Assemblies 19, 20 and 21; induced upon adherence to polystyrene; oxidative stress-induced via Cap1p	0	-1.60959	0.101046	22.5275	0.0282412	0.795947	-1.68104	-1.53814
1736	CUST_5033_PI362308700	orf19.5156	0	Ca21chr7_C_albicans_SC5314	659536	Predicted ORF in Assemblies 19, 20 and 21; has six putative membrane-spanning regions; similar to S. cerevisiae Yjl097p, which is required for growth	PHS1	0.53849	0.0309028	24.643	0.0258195	0.795344	0.516638	0.560342
1743	CUST_1329_PI362308700	orf19.1606	0	Ca21chr3_C_albicans_SC5314	524220	Predicted ORF in Assemblies 19, 20 and 21; Plc1p-regulated	0	3.85265	0.316027	17.2405	0.0368845	0.801779	3.62919	4.07612
1748	CUST_6466_PI362308700	orf19.437	GRS1	Ca21chr1_C_albicans_SC5314	1111223	Putative tRNA-Gly synthetase; genes encoding ribosomal subunits, translation factors, and tRNA synthetases are downregulated upon phagocytosis by murine macrophage; protein detected by mass spec in stationary phase cultures	GRS1	-0.32761	0.03121	14.8449	0.0428199	0.79301	-0.305541	-0.349679
1762	CUST_3679_PI362308700	orf19.6929	0	Ca21chr3_C_albicans_SC5314	807892	Predicted ORF in Assemblies 19, 20 and 21	YER134C	-0.46985	0.0413033	16.0875	0.0395214	0.802206	-0.499056	-0.440644
1767	CUST_5654_PI362308700	orf19.2440	0	Ca21chr1_C_albicans_SC5314	1268667	Predicted ORF in Assemblies 19, 20 and 21; transcription is induced in response to alpha pheromone in SpiderM medium	CUL3	0.466052	0.0460933	14.2992	0.044449	0.792072	0.498645	0.433459
1790	CUST_10288_PI362308700	orf19.3582	0	Ca21chr2_C_albicans_SC5314	1125339	Predicted ORF in Assemblies 19, 20 and 21	SEE1	0.25723	0.028589	12.7244	0.0499288	0.789842	0.277445	0.237014
1791	CUST_11559_PI362308700	orf19.3265	TRM1	Ca21chrR_C_albicans_SC5314	202224	Protein described as an N2,N2-dimethylguanine tRNA methyltransferase; induced upon adherence to polystyrene	TRM1	1.48443	0.0799312	26.2639	0.0242277	0.787881	1.54095	1.42791
1800	CUST_7339_PI362308700	orf19.1592	0	Ca21chr2_C_albicans_SC5314	901795	Predicted ORF in Assemblies 19, 20 and 21	YPL041C	-0.424115	0.0346877	17.2911	0.0367767	0.800857	-0.448643	-0.399587
1807	CUST_9610_PI362308700	orf19.4651	PGA53	Ca21chr4_C_albicans_SC5314	278273	GPI-anchored cell surface protein of unknown function; greater mRNA abundance observed in a cyr1 homozygous null mutant than in wild type	0	0.986252	0.00985178	141.575	0.00449661	0.798962	0.979286	0.993218
1824	CUST_1397_PI362308700	orf19.69	0	Ca21chr1_C_albicans_SC5314	2720131	Predicted ORF in Assemblies 19, 20 and 21; possibly spurious ORF (Annotation Working Group prediction); transcriptionally activated by Mnl1p under weak acid stress	0	1.53464	0.0949063	22.868	0.0278212	0.796934	1.60175	1.46754
1831	CUST_8200_PI362308700	orf19.2351	NIT3	Ca21chr1_C_albicans_SC5314	2375969	Predicted ORF in Assemblies 19, 20 and 21; regulated by Gcn2p and Gcn4p; protein detected by mass spec in exponential and stationary phase cultures	NIT3	-2.0917	0.0757023	39.0756	0.0162884	0.798785	-2.03817	-2.14523
1833	CUST_2658_PI362308700	orf19.2971	0	Ca21chr1_C_albicans_SC5314	593755	Predicted ORF in Assemblies 19, 20 and 21	0	-0.20079	0.0104677	27.1272	0.0234574	0.805567	-0.193388	-0.208192
1840	CUST_2629_PI362308700	orf19.2986	0	Ca21chr1_C_albicans_SC5314	615529	Predicted ORF in Assemblies 19, 20 and 21	0	-0.114633	0.0100594	16.1159	0.0394519	0.806134	-0.10752	-0.121746
1844	CUST_6407_PI362308700	orf19.445	0	Ca21chr1_C_albicans_SC5314	1102445	Predicted ORF in Assemblies 19, 20 and 21; decreased expression in response to prostaglandins	0	0.272717	0.025403	15.1825	0.0418707	0.789746	0.29068	0.254754
1863	CUST_4612_PI362308700	orf19.4177	HIS5	Ca21chr4_C_albicans_SC5314	111285	Predicted ORF in Assemblies 19, 20 and 21; Gcn4p-regulated	HIS5	-2.1643	0.0296709	103.158	0.00617113	0.772021	-2.14332	-2.18528
1922	CUST_2347_PI362308700	orf19.5211	IDP1	Ca21chr2_C_albicans_SC5314	1205852	Protein described as isocitrate dehydrogenase; transcriptionally induced by interaction with macrophage; alkaline upregulated	IDP1	-1.24136	0.0177072	99.1432	0.006421	0.77942	-1.25388	-1.22884
1928	CUST_649_PI362308700	orf19.5634	FRP1	Ca21chr4_C_albicans_SC5314	17454	Predicted ferric reductase; gene alkaline-induced directly by Rim101p; iron-chelation-induced by CCAAT-binding factor (with Hap43p); fluconazole-downregulated; ciclopirox olamine induced; colony morphology-related gene regulation by Ssn6p	FRE5	-0.585919	0.0377498	21.9502	0.0289829	0.794921	-0.559226	-0.612612
1940	CUST_3766_PI362308700	orf19.6459	DPP3	Ca21chr7_C_albicans_SC5314	539309	Protein similar to S. cerevisiae pyrophosphate phosphatase Dpp1p; required for farnesol biosynthesis; downregulated in response to 17-beta-estradiol, ethynyl estradiol	DPP1	-0.470164	0.00692755	95.9809	0.00663253	0.781874	-0.475063	-0.465266
1957	CUST_10387_PI362308700	orf19.5741	ALS1	Ca21chr6_C_albicans_SC5314	791472	Adhesin; ALS family of cell-surface glycoproteins; adhesion, virulence roles; immunoprotective; in band at hyphal base; amyloid domain; biofilm-induced; Rfg1p, Ssk1p, growth-regulated; strain background affects expression	SAG1	2.58675	0.0439378	83.259	0.00764589	0.762103	2.61781	2.55568
1958	CUST_8367_PI362308700	orf19.3964	ASH2	Ca21chr5_C_albicans_SC5314	1036689	Predicted ORF in Assemblies 19, 20 and 21	BRE2	0.330398	0.026962	17.3301	0.0366943	0.801911	0.349463	0.311333
1991	CUST_7454_PI362308700	orf19.3749	IFC3	Ca21chrR_C_albicans_SC5314	496621	Oligopeptide transporter; transcriptionally induced upon phagocytosis by macrophage; induced by BSA or peptides; fluconazole-induced; upregulated by Rim101p at pH 8; virulence-group-correlated expression; no human or murine homolog	OPT2	-1.40856	0.0253271	78.6511	0.00809379	0.769223	-1.42647	-1.39065
2001	CUST_7665_PI362308700	orf19.3893	SCW11	Ca21chr5_C_albicans_SC5314	916885	Cell wall protein; transcription is decreased in mutant lacking ACE2; downregulated in core caspofungin response; expression greater in high iron; possibly an essential gene, disruptants not obtained by UAU1 method	SCW11	-0.645306	0.0183765	49.6613	0.0128175	0.777934	-0.632312	-0.6583
2007	CUST_3790_PI362308700	orf19.4278	0	Ca21chr5_C_albicans_SC5314	588725	Predicted ORF in Assemblies 19, 20 and 21	BYE1	-0.3581	0.00870579	58.1716	0.0109428	0.808182	-0.364256	-0.351944
2020	CUST_3730_PI362308700	orf19.6469	0	Ca21chr7_C_albicans_SC5314	526233	Predicted ORF in retrotransposon Tca11 with similarity to the Gag-Pol region of retrotransposons, which encodes nucleocapsid-like protein, reverse transcriptase, protease, and integrase	YGR109W-B	0.603288	0.04842	17.6204	0.036091	0.795821	0.56905	0.637526
2026	CUST_2457_PI362308700	orf19.6985	TEA1	Ca21chr3_C_albicans_SC5314	1229453	Putative transcription factor with zinc cluster DNA-binding motif; has similarity to S. cerevisiae Tea1p	TEA1	-0.41963	0.0405024	14.6521	0.0433817	0.78794	-0.448269	-0.39099
2053	CUST_11644_PI362308700	orf19.1699	BZZ1	Ca21chr3_C_albicans_SC5314	320137	Protein similar to S. cerevisiae Bzz1p, which is an SH3 domain protein involved in the regulation of actin polymerization	BZZ1	-0.59252	0.0521919	16.0552	0.0396008	0.801165	-0.629425	-0.555615
2059	CUST_4911_PI362308700	orf19.7357	0	Ca21chr3_C_albicans_SC5314	1289708	Predicted ORF in Assemblies 19, 20 and 21	CAB2	-0.45097	0.0236726	26.9412	0.0236191	0.806603	-0.46771	-0.434231
2101	CUST_6270_PI362308700	orf19.6240	0	Ca21chr1_C_albicans_SC5314	1433503	Predicted ORF in Assemblies 19, 20 and 21	CYK3	-0.647117	0.056822	16.1057	0.0394768	0.803963	-0.687296	-0.606937
2106	CUST_5159_PI362308700	orf19.1441	0	Ca21chr2_C_albicans_SC5314	239103	Predicted ORF in Assemblies 19, 20 and 21	0	-0.299713	0.0288552	14.6891	0.0432727	0.790647	-0.279309	-0.320116
2107	CUST_2127_PI362308700	orf19.2895	VMA8	Ca21chr4_C_albicans_SC5314	1420702	Protein similar to the S. cerevisiae Vma8p subunit of vacuolar H+-ATPase; transcription is regulated by Nrg1p and Mig1p; transcription is increased in populations of cells exposed to fluconazole over multiple generations	VMA8	0.148765	0.00787116	26.7287	0.0238067	0.804052	0.143199	0.154331
2120	CUST_5598_PI362308700	orf19.2454	PHO87	Ca21chr1_C_albicans_SC5314	1244696	Protein similar to phosphate permeases; transcription is negatively regulated by Rim101p at pH 8; expression is regulated upon white-opaque switching; caspofungin repressed; biofilm-regulated; virulence-group-correlated expression	PHO87|PHO90	-0.802189	0.0374862	30.2636	0.0210282	0.803133	-0.775682	-0.828696
2123	CUST_9263_PI362308700	orf19.5250	0	Ca21chr1_C_albicans_SC5314	2653711	Predicted ORF in Assemblies 19, 20 and 21	0	-0.113965	0.010651	15.1319	0.0420103	0.789948	-0.121496	-0.106433
2128	CUST_4352_PI362308700	orf19.4592	HSX11	Ca21chr4_C_albicans_SC5314	396564	UDP-glucose:ceramide glucosyltransferase (glucosylceramide synthase [GCS], EC 2.4.1.80); involved in glucosylceramide biosynthesis, which is important for virulence	0	-0.0966566	0.000478788	285.498	0.00222985	0.881869	-0.0969951	-0.096318
2150	CUST_6545_PI362308700	orf19.7426	0	Ca21chr3_C_albicans_SC5314	1460545	Predicted ORF in Assemblies 19, 20 and 21	OST6	0.362019	0.00588983	86.9248	0.00732347	0.794565	0.366184	0.357855
2153	CUST_880_PI362308700	orf19.7021	GPH1	Ca21chr7_C_albicans_SC5314	195079	Putative glycogen phosphorylase; gene regulated by Ssk1p, Mig1p, and Tup1p; fluconazole-induced; localizes to cell surface of hyphal cells, but not yeast-form cells; S. cerevisiae Gph1p is a stress-regulated protein of glycogen metabolism	GPH1	-0.487617	0.0197102	34.9867	0.0181911	0.808054	-0.501554	-0.47368
2166	CUST_10739_PI362308700	orf19.2284	0	Ca21chr2_C_albicans_SC5314	1481535	Predicted ORF in Assemblies 19, 20 and 21	0	-2.22594	0.0187186	168.172	0.00378547	0.800171	-2.2127	-2.23917
2169	CUST_3914_PI362308700	orf19.2703	0	Ca21chr4_C_albicans_SC5314	603321	Transcriptionally regulated by iron; expression greater in low iron; increased expression observed in an ssr1 homozygous null mutant; similar to S. cerevisiae Ymr171cp; fungal-specific (no human or murine homolog)	EAR1	-0.797344	0.0742078	15.1954	0.0418354	0.790295	-0.744871	-0.849817
2177	CUST_3820_PI362308700	orf19.2092	0	Ca21chr2_C_albicans_SC5314	56710	Predicted ORF in Assemblies 19, 20 and 21; Gcn4p-regulated	STR3	-0.985945	0.00044212	3153.75	0.000201861	0.82494	-0.985632	-0.986257
2192	CUST_4711_PI362308700	orf19.4146	SMD3	Ca21chr5_C_albicans_SC5314	338300	Protein described as a core snRNP protein; induced upon adherence to polystyrene	SMD3	0.205615	0.00520156	55.903	0.0113867	0.816381	0.209293	0.201937
2205	CUST_11211_PI362308700	orf19.1352	0	Ca21chr2_C_albicans_SC5314	1678514	Predicted ORF in Assemblies 19, 20 and 21	TIM22	0.927439	0.0777717	16.8647	0.0377045	0.799753	0.982432	0.872446
2211	CUST_3804_PI362308700	orf19.2099	0	Ca21chr2_C_albicans_SC5314	41945	Predicted ORF in Assemblies 19, 20 and 21	HIR1	-1.07679	0.0290606	52.4011	0.0121475	0.805018	-1.05624	-1.09734
2239	CUST_2571_PI362308700	orf19.1224	FRP3	Ca21chr2_C_albicans_SC5314	1365218	Upregulated in the presence of human neutrophils; fluconazole-downregulated; repressed by nitric oxide	ATO2	0.880545	0.0817499	15.2328	0.0417329	0.79202	0.938351	0.822739
2242	CUST_6941_PI362308700	orf19.7521	REP1	Ca21chrR_C_albicans_SC5314	36752	Protein involved in negative regulation of MDR1 transcription; mutants show increased resistance to azole drugs	0	-0.140994	0.001174	169.843	0.00374823	0.850988	-0.141825	-0.140164
2273	CUST_4341_PI362308700	orf19.4597	0	Ca21chr4_C_albicans_SC5314	382277	Predicted ORF in Assemblies 19, 20 and 21; possibly an essential gene, disruptants not obtained by UAU1 method	CAP2	-0.455971	0.00857124	75.233	0.00846147	0.730547	-0.44991	-0.462031
2286	CUST_1050_PI362308700	orf19.6561	LAT1	Ca21chr7_C_albicans_SC5314	352680	Protein described as dihydrolipoamide acetyltransferase component (E2) of pyruvate dehydrogenase complex	LAT1	-0.918786	0.0163305	79.5664	0.00800069	0.77848	-0.907239	-0.930334
2290	CUST_4005_PI362308700	orf19.7577	MSS51	Ca21chrR_C_albicans_SC5314	2146359	Putative mRNA maturation factor; fungal-specific (no human or murine homolog)	MSS51	-0.127068	0.00687808	26.1266	0.0243548	0.783701	-0.122204	-0.131931
2294	CUST_4080_PI362308700	orf19.459	ADP1	Ca21chrR_C_albicans_SC5314	1248992	Putative PDR-subfamily ABC transporter; similar to WHITE subfamily proteins; gene used for strain identification by multilocus sequence typing	ADP1	-0.627924	0.0278823	31.8488	0.0199823	0.803221	-0.64764	-0.608208
2313	CUST_3157_PI362308700	orf19.7250	0	Ca21chr1_C_albicans_SC5314	3162285	Predicted ORF in Assemblies 19, 20 and 21	YPI1	-0.226268	0.001413	226.461	0.00281115	0.820587	-0.225269	-0.227267
2317	CUST_12174_PI362308700	orf19.6872	0	Ca21chr2_C_albicans_SC5314	1140248	Predicted ORF in Assemblies 19, 20 and 21	YLR126C	-0.70658	0.0339226	29.4569	0.0216036	0.802606	-0.682593	-0.730567
2404	CUST_1382_PI362308700	orf19.6496	TRS33	Ca21chr7_C_albicans_SC5314	477807	Predicted ORF in Assemblies 19, 20 and 21; constitutive expression independent of MTL or white-opaque status	TRS33	0.0973335	0.00615063	22.3799	0.0284272	0.795701	0.101683	0.0929843
2407	CUST_810_PI362308700	orf19.1252	YME1	Ca21chr4_C_albicans_SC5314	1245692	Protein not essential for viability; similar to S. cerevisiae Yme1p, which is a mitochondrial inner membrane protease of the AAA family	YME1	-0.59579	0.0465573	18.0976	0.0351413	0.79343	-0.628711	-0.562869
2456	CUST_9850_PI362308700	orf19.7276.1	TLO4	Ca21chr1_C_albicans_SC5314	3186870	Member of a family of telomere-proximal genes of unknown function; transcription is upregulated in an RHE model of oral candidiasis	0	-0.312758	0.00985353	44.8881	0.01418	0.793822	-0.319725	-0.30579
2463	CUST_10057_PI362308700	orf19.1031	HMG1	Ca21chr1_C_albicans_SC5314	793652	HMG-CoA reductase; enzyme of sterol pathway; inhibited by lovastatin; gene not transcriptionally regulated in response to lovastatin and fluconazole	HMG2	0.197631	0.0115109	24.2808	0.0262043	0.799166	0.189492	0.20577
2485	CUST_5832_PI362308700	orf19.794	SSN3	Ca21chr2_C_albicans_SC5314	893154	Predicted ORF in Assemblies 19, 20 and 21; mutants are sensitive to growth on H2O2 medium	SSN3	-0.654275	0.0066823	138.468	0.00459752	0.793881	-0.64955	-0.659
2560	CUST_1967_PI362308700	orf19.1753	PUS7	Ca21chr2_C_albicans_SC5314	2114501	Protein similar to S. cerevisiae tRNA modification protein; induced upon biofilm formation	PUS7	0.5499	0.0091167	85.3024	0.00746275	0.788736	0.543454	0.556347
2561	CUST_10629_PI362308700	orf19.4495	NDH51	Ca21chr2_C_albicans_SC5314	954019	Subunit of nicotinamide adenine dinucleotide dehydrogenase complex I, of the mitochondrial electron transport chain; required for wild-type filamentous growth; alkaline downregulated	0	0.869118	0.0469037	26.2052	0.0242819	0.785478	0.902284	0.835952
2592	CUST_6958_PI362308700	orf19.3168	RPN8	Ca21chr5_C_albicans_SC5314	455238	Predicted ORF in Assemblies 19, 20 and 21; mutation confers hypersensitivity to amphotericin B; transcription is regulated by Mig1p; regulated by Gcn2p and Gcn4p	RPN8	-0.383135	0.0172464	31.4173	0.0202565	0.795978	-0.39533	-0.37094
2593	CUST_2857_PI362308700	orf19.866	RAD32	Ca21chr2_C_albicans_SC5314	749879	Protein similar to S. cerevisiae protein with role in nucleotide excision repair; down-regulation associated with azole resistance	RAD30	-1.53464	0.157517	13.7783	0.0461238	0.795327	-1.42326	-1.64602
2604	CUST_6013_PI362308700	orf19.6908	0	Ca21chr7_C_albicans_SC5314	262554	Predicted ORF in Assemblies 19, 20 and 21	FOL3	0.11024	0.00264009	59.0522	0.0107796	0.800957	0.112107	0.108373
2631	CUST_7100_PI362308700	orf19.4090.1	0	Ca21chr2_C_albicans_SC5314	1898915	ORF Predicted by Annotation Working Group	VMA21	0.910815	0.0957711	13.4496	0.0472467	0.787016	0.843095	0.978536
2640	CUST_9777_PI362308700	orf19.985	0	Ca21chr1_C_albicans_SC5314	2311282	Predicted ORF in Assemblies 19, 20 and 21	YEL043W	-0.197813	0.0041632	67.1957	0.00947342	0.749317	-0.200756	-0.194869
2644	CUST_3809_PI362308700	orf19.2097	0	Ca21chr2_C_albicans_SC5314	44288	Predicted ORF in Assemblies 19, 20 and 21	RAD5	-1.02496	0.00470637	307.991	0.002067	0.938572	-1.02164	-1.02829
2681	CUST_3799_PI362308700	orf19.4274	PUT1	Ca21chr5_C_albicans_SC5314	580957	Alkaline upregulated by Rim101p	PUT1	1.68797	0.0968927	24.6371	0.0258257	0.793542	1.75649	1.61946
2695	CUST_6772_PI362308700	orf19.2073	0	Ca21chr2_C_albicans_SC5314	84814	Predicted ORF in Assemblies 19, 20 and 21; transcriptionally activated by Mnl1p under weak acid stress	YDR338C	-0.260238	0.00994394	37.0108	0.0171968	0.807786	-0.253207	-0.26727
2715	CUST_7284_PI362308700	orf19.1282	CKS1	Ca21chr5_C_albicans_SC5314	909921	Predicted ORF in Assemblies 19, 20 and 21	CKS1	0.386127	1.85657e-05	29412.6	2.16444e-05	0.265361	0.386114	0.38614
2739	CUST_2523_PI362308700	orf19.3414	SUR7	Ca21chr6_C_albicans_SC5314	365076	Protein required for wild-type cell wall, plasma membrane, cytoskeletal organization, endocytosis; localizes to eisosome subdomains of plasma membrane; four transmembrane motifs; mutant shows ectopic, chitin-rich cell wall	SUR7	0.836536	0.0827255	14.3008	0.044444	0.793135	0.895032	0.778041
2744	CUST_3217_PI362308700	orf19.5065	0	Ca21chr1_C_albicans_SC5314	1727666	Predicted ORF in Assemblies 19, 20 and 21	ERD1	-0.200607	0.0114305	24.8197	0.0256359	0.795687	-0.20869	-0.192525
2753	CUST_11840_PI362308700	orf19.7149	0	Ca21chr7_C_albicans_SC5314	926413	Predicted ORF in Assemblies 19, 20 and 21	YMR258C	1.40077	0.14995	13.211	0.048097	0.788327	1.29474	1.5068
2774	CUST_5496_PI362308700	orf19.1864	0	Ca21chr2_C_albicans_SC5314	1554414	Predicted ORF in Assemblies 19, 20 and 21	YDR333C	-0.592283	0.043614	19.2052	0.0331184	0.788411	-0.623123	-0.561443
2783	CUST_69_PI362308700	orf19.2940	0	Ca21chr1_C_albicans_SC5314	528083	Predicted ORF in Assemblies 19, 20 and 21; possibly an essential gene, disruptants not obtained by UAU1 method	BOS1	0.172691	0.00185469	131.678	0.00483459	0.759898	0.171379	0.174002
2784	CUST_2426_PI362308700	orf19.6993	GAP2	Ca21chr3_C_albicans_SC5314	1248655	Protein similar to amino acid permeases; ketoconazole, flucytosine repressed; induced by histidine, and induction requires Ssy1p; regulated by Nrg1p, Tup1p; shows colony morphology-related gene regulation by Ssn6p	GAP1	-0.374133	0.00625327	84.6124	0.00752361	0.78169	-0.369711	-0.378554
2802	CUST_125_PI362308700	orf19.2928	0	Ca21chr1_C_albicans_SC5314	505263	Predicted ORF in Assemblies 19, 20 and 21	YOL107W	0.521636	0.00980884	75.2082	0.00846426	0.725677	0.528572	0.514701
2835	CUST_1823_PI362308700	orf19.261	0	Ca21chr3_C_albicans_SC5314	582643	Predicted ORF in Assemblies 19, 20 and 21	SEC59	0.455839	0.0389763	16.5396	0.0384438	0.801567	0.428278	0.483399
2841	CUST_3443_PI362308700	orf19.3679	0	Ca21chr1_C_albicans_SC5314	463884	Predicted ORF in Assemblies 19, 20 and 21; protein detected by mass spec in stationary phase cultures	YNL200C	-0.882681	0.0332035	37.5955	0.0169294	0.804476	-0.859203	-0.90616
2852	CUST_12112_PI362308700	orf19.5008.1	0	Ca21chr1_C_albicans_SC5314	3013825	ORF Predicted by Annotation Working Group	DAD1	-0.381925	0.025203	21.4309	0.0296841	0.787722	-0.364104	-0.399746
2853	CUST_11950_PI362308700	orf19.7107	0	Ca21chr7_C_albicans_SC5314	20349	Predicted ORF in Assemblies 19, 20 and 21	ALB1	0.572804	0.040917	19.7978	0.0321288	0.790962	0.543871	0.601736
2863	CUST_6806_PI362308700	orf19.2068	0	Ca21chr2_C_albicans_SC5314	95127	Predicted ORF in Assemblies 19, 20 and 21	0	0.303737	0.0326548	13.1543	0.0483036	0.788551	0.280647	0.326828
2872	CUST_8833_PI362308700	orf19.6458.1	0	Ca21chr7_C_albicans_SC5314	540454	ORF Predicted by Annotation Working Group	LSM4	1.42165	0.0297947	67.4792	0.00943362	0.755923	1.40059	1.44272
2915	CUST_10225_PI362308700	orf19.5776	TOM1	Ca21chr2_C_albicans_SC5314	654222	Predicted ORF in Assemblies 19, 20 and 21; transcription is regulated by Nrg1p and Mig1p	TOM1	-0.172624	0.0118545	20.5937	0.030889	0.785683	-0.181007	-0.164242
2922	CUST_3004_PI362308700	orf19.175	0	Ca21chrR_C_albicans_SC5314	552466	Predicted ORF in Assemblies 19, 20 and 21	0	-0.204924	0.0141444	20.4891	0.0310465	0.78319	-0.214926	-0.194923
2926	CUST_2404_PI362308700	orf19.3014	BMH1	Ca21chr1_C_albicans_SC5314	675939	14-3-3 protein, role in hyphal growth; possibly regulated by host interaction; sole 14-3-3 protein in C. albicans while S. cerevisiae has two 14-3-3 proteins; localizes to cell surface of yeast-form cells but not of hyphae; intron in 5'-UTR	BMH2	-0.343295	0.0202091	24.0235	0.0264846	0.799758	-0.329005	-0.357585
2927	CUST_4821_PI362308700	orf19.670	SMT3	Ca21chr1_C_albicans_SC5314	2487456	SUMO, small ubiquitin-like protein; Smt3p-conjugated proteins localize to septation site and mother side of bud neck; C. albicans septins appear not to be Smt3p-modified, in contrast to S. cerevisiae septins; similar to S. cerevisiae Smt3p	SMT3	-0.531136	0.00289102	259.818	0.00245024	0.750999	-0.529092	-0.53318
2953	CUST_10751_PI362308700	orf19.6638	PTC4	Ca21chrR_C_albicans_SC5314	1218941	Type PP2C serine/threonine phosphatase; localized to mitochondria; mutation causes sensitivity to sodium, potassium and azole drugs; decreased expression in hyphae compared to yeast-form cells	PTC4	-0.500106	0.0376238	18.7982	0.0338342	0.78711	-0.473502	-0.52671
2967	CUST_1651_PI362308700	orf19.3548.1	WH11	Ca21chr2_C_albicans_SC5314	1069064	Cytoplasmic protein expressed specifically in white phase yeast-form cells; expression in opaque cells increases virulence and frequency of opaque-to-white switching; null mutant shows wild-type switching; similar to S. cerevisiae Hsp12p	HSP12	2.42147	0.146816	23.325	0.0272768	0.788711	2.31766	2.52529
2969	CUST_4536_PI362308700	orf19.4199	0	Ca21chr6_C_albicans_SC5314	107927	Predicted ORF in Assemblies 19, 20 and 21	SLY41	0.326488	0.0137513	33.5769	0.0189545	0.818246	0.316765	0.336212
2993	CUST_2870_PI362308700	orf19.5789	ADE8	Ca21chr2_C_albicans_SC5314	622886	Putative phosphoribosylglycinamide formyl-transferase, enzyme of amino acid biosynthesis pathway; upregulated in biofilm; S. cerevisiae ortholog is Gcn4p regulated; protein detected by mass spectometry in stationary phase cultures	ADE8	0.929568	0.0468507	28.0595	0.0226786	0.805912	0.89644	0.962697
3047	CUST_9615_PI362308700	orf19.2475	PGA26	Ca21chr1_C_albicans_SC5314	1204573	Putative GPI-anchored protein of unknown function; transcriptionally regulated by iron; expression greater in high iron; induced during cell wall regeneration; possibly spurious ORF (Annotation Working Group prediction)	0	1.12796	0.0507547	31.4291	0.0202489	0.798238	1.09207	1.16385
3080	CUST_11426_PI362308700	orf19.1459	PPE1	Ca21chr2_C_albicans_SC5314	271750	Protein similar to S. cerevisiae Ppe1p; shows genetic interaction with some genes involved in diploid filamentous growth and haploid invasive growth in S. cerevisiae	PPE1	-0.262135	0.00612446	60.5302	0.0105164	0.795873	-0.257805	-0.266466
3082	CUST_6938_PI362308700	orf19.7523	MKC1	Ca21chrR_C_albicans_SC5314	32402	MAP kinase; role in biofilm formation, contact-induced invasive filamentation, systemic virulence in mouse, cell wall structure/maintenance, caspofungin response; phosphorylated on surface contact, membrane perturbation, or cell wall stress	SLT2	0.827555	0.0551961	21.2033	0.0300023	0.787641	0.788525	0.866584
3083	CUST_12166_PI362308700	orf19.6877	PNG2	Ca21chr2_C_albicans_SC5314	1157113	Putative peptide:N-glycanase; gene contains highly variable numbers of 12-bp repeats; transcription is upregulated under treatment with caspofungin, ciclopirox olamine or ketoconazole; gene of core caspofungin response	0	-0.129809	0.0100986	18.1785	0.0349852	0.791363	-0.13695	-0.122668
3094	CUST_8259_PI362308700	orf19.4517	0	Ca21chr2_C_albicans_SC5314	914828	Predicted ORF in Assemblies 19, 20 and 21	0	0.593044	0.0557231	15.0511	0.0422353	0.789336	0.553642	0.632446
3111	CUST_11648_PI362308700	orf19.1698	0	Ca21chr3_C_albicans_SC5314	320920	Predicted ORF in Assemblies 19, 20 and 21	APP1	-0.19742	0.0054316	51.4019	0.0123836	0.794884	-0.201261	-0.19358
3112	CUST_10672_PI362308700	orf19.6650	0	Ca21chrR_C_albicans_SC5314	1203045	Predicted ORF in Assemblies 19, 20 and 21; possibly spurious ORF (Annotation Working Group prediction)	0	-0.186169	0.0119362	22.0575	0.0288421	0.796407	-0.194609	-0.177729
3117	CUST_7417_PI362308700	orf19.3753	SEF1	Ca21chrR_C_albicans_SC5314	482445	Putative transcription factor with zinc cluster DNA-binding motif; has a potential role in regulating iron uptake; transcription is negatively regulated by Sfu1p and positively regulated by Tbf1p	SEF1	-0.176132	0.0121027	20.5812	0.0309078	0.784533	-0.167574	-0.18469
3121	CUST_4540_PI362308700	orf19.4197	YHM2	Ca21chr6_C_albicans_SC5314	110646	Alkaline upregulated	YHM2	-0.588373	0.0542021	15.3515	0.0414109	0.795765	-0.550047	-0.6267
3127	CUST_4967_PI362308700	orf19.7344	0	Ca21chrR_C_albicans_SC5314	2023763	Predicted ORF in Assemblies 19, 20 and 21	HDA3	4.51275	0.297475	21.4539	0.0296524	0.788588	4.72309	4.3024
3134	CUST_1354_PI362308700	orf19.92	0	Ca21chr6_C_albicans_SC5314	181089	Predicted ORF in Assemblies 19, 20 and 21; increased expression in response to prostaglandins	YFR016C	-0.815504	0.0136812	84.2978	0.00755167	0.771529	-0.825178	-0.805829
3137	CUST_12071_PI362308700	orf19.7127.1	0	Ca21chr7_C_albicans_SC5314	942255	Putative protein of unknown function, transcription is upregulated in an RHE model of oral candidiasis; ORF Predicted by Annotation Working Group	0	-0.316481	0.032017	13.9792	0.0454632	0.790608	-0.293841	-0.33912
3158	CUST_1296_PI362308700	orf19.1624	0	Ca21chr3_C_albicans_SC5314	477389	Predicted ORF in Assemblies 19, 20 and 21	MAK10	0.587996	0.0214774	38.7176	0.016439	0.790361	0.572809	0.603183
3169	CUST_8755_PI362308700	orf19.2249	0	Ca21chr2_C_albicans_SC5314	1427146	Predicted ORF in Assemblies 19, 20 and 21; decreased expression observed in an ssr1 homozygous null mutant	ATP23	0.18258	0.0033776	76.4471	0.00832711	0.739785	0.184969	0.180192
3206	CUST_1936_PI362308700	orf19.7059	0	Ca21chr7_C_albicans_SC5314	99298	Predicted ORF in Assemblies 19, 20 and 21	SWT1	-0.519919	0.00512641	143.429	0.00443849	0.800234	-0.523544	-0.516294
3262	CUST_9302_PI362308700	orf19.3380	HWP2	Ca21chr4_C_albicans_SC5314	741271	Putative GPI-anchored, glycosylated cell wall protein, required for filamentous growth on some solid media; null mutant exhibits delayed virulence; expressed in hyphae; regulated by Efg1p, Tup1p; has similarity to Hwp1p and Rbt1p domains	0	0.30165	0.0164076	26	0.0244733	0.783402	0.313252	0.290048
3265	CUST_653_PI362308700	orf19.3459	0	Ca21chr6_C_albicans_SC5314	455539	Predicted ORF in Assemblies 19, 20 and 21; possibly an essential gene, disruptants not obtained by UAU1 method	MCK1	0.127467	0.0118244	15.2453	0.0416987	0.793829	0.119106	0.135828
3310	CUST_6132_PI362308700	orf19.2515	0	Ca21chr3_C_albicans_SC5314	230085	Predicted ORF in Assemblies 19, 20 and 21	0	2.3397	0.144814	22.8489	0.0278444	0.795741	2.2373	2.4421
3315	CUST_6593_PI362308700	orf19.3060	0	Ca21chr1_C_albicans_SC5314	749657	Predicted ORF in Assemblies 19, 20 and 21	SWP1	-0.0560865	0.00407225	19.4778	0.0326558	0.791225	-0.058966	-0.053207
3372	CUST_3087_PI362308700	orf19.1964	0	Ca21chr5_C_albicans_SC5314	227465	Putative protein of unknown function; downregulated upon fluphenazine treatment; upregulated upon benomyl treatment and in an RHE model; regulated by Nrg1p, Tup1p	0	-0.584623	0.0295119	28.0153	0.0227144	0.804851	-0.563755	-0.605491
3421	CUST_9038_PI362308700	orf19.5402	0	Ca21chr3_C_albicans_SC5314	90951	ORF Predicted by Annotation Working Group; overlaps orf19.5401	0	0.53351	0.014329	52.6552	0.0120889	0.805488	0.523377	0.543642
3426	CUST_5778_PI362308700	orf19.6129	MRPL8	Ca21chrR_C_albicans_SC5314	1605725	Predicted ribosomal protein of the mitochondrial 60S subunit	MRPL8	0.418108	0.0420832	14.0506	0.0452328	0.792221	0.447866	0.388351
3445	CUST_7552_PI362308700	orf19.4323	0	Ca21chr5_C_albicans_SC5314	660193	Predicted ORF in Assemblies 19, 20 and 21	YPT35	0.393741	0.0338092	16.4699	0.0386061	0.803584	0.369835	0.417648
3467	CUST_1078_PI362308700	orf19.5045	0	Ca21chr4_C_albicans_SC5314	826204	Predicted ORF in Assemblies 19, 20 and 21; transcriptionally activated by Mnl1p under weak acid stress	PTP2	0.383083	0.0402951	13.4448	0.0472635	0.786229	0.35459	0.411576
3501	CUST_2569_PI362308700	orf19.1225	0	Ca21chr2_C_albicans_SC5314	1367676	Predicted ORF in Assemblies 19, 20 and 21; possibly spurious ORF (Annotation Working Group prediction)	0	1.07807	0.0754491	20.2072	0.0314789	0.787615	1.02472	1.13142
3518	CUST_7986_PI362308700	orf19.4826	IDH1	Ca21chr1_C_albicans_SC5314	2120442	Predicted ORF in Assemblies 19, 20 and 21; soluble protein in hyphae; protein level decreased in stationary phase cultures	IDH1	0.23478	0.0191751	17.3156	0.0367248	0.80115	0.221221	0.248339
3525	CUST_8536_PI362308700	orf19.5510	0	Ca21chr6_C_albicans_SC5314	503452	Predicted ORF in Assemblies 19, 20 and 21	ITC1	0.393343	0.0132958	41.8382	0.0152133	0.807426	0.402744	0.383941
3535	CUST_6164_PI362308700	orf19.4099	ECM17	Ca21chr2_C_albicans_SC5314	1260036	Predicted enzyme of sulfur amino acid biosynthesis; putative role in regulation of cell wall biogenesis; upregulated in biofilm; possibly adherence-induced; regulated by Tsa1p, Tsa1Bp under H2O2 stress; Gcn4p-regulated; Tbf1p-activated	MET5	-1.25209	0.100767	17.5724	0.0361894	0.795128	-1.32334	-1.18083
3542	CUST_10473_PI362308700	orf19.5905	0	Ca21chr3_C_albicans_SC5314	942960	Predicted ORF in Assemblies 19, 20 and 21; induced upon biofilm formation	YBL028C	-0.154099	0.00822671	26.4903	0.0240207	0.798088	-0.159916	-0.148281
3568	CUST_1941_PI362308700	orf19.3932	0	Ca21chr5_C_albicans_SC5314	980773	Predicted ORF in Assemblies 19, 20 and 21; induced in core caspofungin response; increased expression observed in ssr1 homozygous null mutant; induced by nitric oxide in yhb1 mutant; protein detected by mass spec in stationary phase culture	0	1.90374	0.0340104	79.1609	0.00804167	0.776306	1.87969	1.92779
3569	CUST_5022_PI362308700	orf19.7332	ELF1	Ca21chrR_C_albicans_SC5314	1985195	Protein required for wild-type morphology, growth; Walker A and B (ATP/GTP binding) motifs, ABC transporter consensus; expressed in hyphal, pseudohyphal, and yeast form, upregulated in biofilm; S. pombe homolog is ABC ATPase of mRNA export	NEW1	0.207454	0.000459896	637.937	0.000997935	0.719687	0.207129	0.207779
3624	CUST_3722_PI362308700	orf19.4294	0	Ca21chr5_C_albicans_SC5314	614957	Predicted ORF in Assemblies 19, 20 and 21	CYC2	0.434489	0.00813974	75.489	0.00843279	0.733234	0.440245	0.428733
3635	CUST_11046_PI362308700	orf19.3559	0	Ca21chr2_C_albicans_SC5314	1093099	Predicted ORF in Assemblies 19, 20 and 21	MRPS35	0.511774	0.0173488	41.7181	0.0152571	0.802799	0.499507	0.524042
3636	CUST_9835_PI362308700	orf19.956	0	Ca21chr5_C_albicans_SC5314	63318	Predicted ORF in Assemblies 19, 20 and 21	CSF1	-0.360447	0.0397919	12.8104	0.049595	0.790683	-0.388584	-0.33231
3639	CUST_1352_PI362308700	orf19.93	0	Ca21chr6_C_albicans_SC5314	182745	Predicted ORF in Assemblies 19, 20 and 21; shows colony morphology-related gene regulation by Ssn6p	MIC17	-0.773493	0.0612393	17.8625	0.0356029	0.793622	-0.816796	-0.73019
3644	CUST_1954_PI362308700	orf19.7055	0	Ca21chr7_C_albicans_SC5314	106646	Predicted ORF in Assemblies 19, 20 and 21; possibly spurious ORF (Annotation Working Group prediction)	0	0.273826	0.00141179	274.296	0.00232091	0.769038	0.272828	0.274825
3647	CUST_9324_PI362308700	orf19.5555	0	Ca21chr6_C_albicans_SC5314	580595	Predicted ORF in Assemblies 19, 20 and 21	0	-0.717449	0.0608965	16.6615	0.0381633	0.799798	-0.760509	-0.674388
3672	CUST_5714_PI362308700	orf19.4601	0	Ca21chr4_C_albicans_SC5314	372364	Predicted ORF in Assemblies 19, 20 and 21; possibly an essential gene, disruptants not obtained by UAU1 method	TFC1	-0.0824344	0.0024193	48.1874	0.0132094	0.778595	-0.0841451	-0.0807237
3674	CUST_10482_PI362308700	orf19.3728	0	Ca21chrR_C_albicans_SC5314	530049	Predicted ORF in Assemblies 19, 20 and 21	GIP4	-0.743549	0.00836025	125.778	0.00506134	0.77565	-0.737638	-0.749461
3691	CUST_9507_PI362308700	orf19.6850	0	Ca21chr1_C_albicans_SC5314	940083	Putative transcription factor with C3HC4 zinc finger DNA-binding motif; not essential for viability	RMD5	-0.41162	0.00741464	78.5093	0.0081084	0.764685	-0.406377	-0.416863
3713	CUST_4210_PI362308700	orf19.4887	ECM21	Ca21chr1_C_albicans_SC5314	2242403	Protein not essential for viability; similar to S. cerevisiae Ecm21p (possible cell wall role); alkaline upregulated by Rim101p; fluconazole induced; caspofungin repressed; downregulated in azole-resistant strain overexpressing MDR1	CSR2	0.302086	0.0148533	28.7622	0.022125	0.807299	0.291583	0.312589
3733	CUST_10056_PI362308700	orf19.1032	SKO1	Ca21chr1_C_albicans_SC5314	788364	Putative transcription factor involved in cell wall damage response, similar to S. cerevisiae Sko1p; mutation causes caspofungin sensitivity; induced by osmotic stress via Hog1p; transcriptionally activated by Mnl1p under weak acid stress	SKO1	0.679194	0.00566993	169.407	0.00375789	0.837667	0.683203	0.675185
3748	CUST_7970_PI362308700	orf19.2654	RMS1	Ca21chr5_C_albicans_SC5314	734722	Protein induced during the mating process; possibly an essential gene, disruptants not obtained by UAU1 method	RKM4	1.23719	0.104327	16.7709	0.037915	0.79869	1.31096	1.16342
3751	CUST_358_PI362308700	orf19.3298	CCH1	Ca21chr1_C_albicans_SC5314	213644	Putative voltage-gated Ca2+ channel of the high affinity calcium uptake system; roles in thigmotropism, establishment of galvanotropism; transcription is regulated by Nrg1p and Mig1p	CCH1	-0.367943	0.0240832	21.6063	0.0294435	0.78816	-0.350913	-0.384972
3776	CUST_4319_PI362308700	orf19.6782	BMT1	Ca21chr3_C_albicans_SC5314	1645825	Putative beta-mannosyltransferase, required for addition of the first beta-mannose residue to the acid-stable fraction of cell wall phosphopeptidomannan; member of a 9-gene family; predicted ORF in Assemblies 19, 20 and 21	0	0.104958	0.00967183	15.3469	0.0414235	0.79476	0.111797	0.0981186
3779	CUST_5181_PI362308700	orf19.3610	0	Ca21chr2_C_albicans_SC5314	1761870	Predicted ORF in Assemblies 19, 20 and 21; upregulation correlates with clinical development of fluconazole resistance	0	1.3734	0.106597	18.2208	0.0349041	0.793924	1.29803	1.44878
3809	CUST_5863_PI362308700	orf19.771	LPG20	Ca21chr1_C_albicans_SC5314	984797	Protein of aldo-keto reductase family; nonessential; similar to aryl alcohol dehydrogenases, S. cerevisiae Ypl088wp, A. tumefaciens MocA; osmotic stress-induced, correlates with overexpression of MDR1 in fluconazole-resistant isolate	YPL088W	-0.856508	0.0658867	18.3844	0.0345942	0.789805	-0.903097	-0.809919
3817	CUST_235_PI362308700	orf19.578	0	Ca21chr5_C_albicans_SC5314	180051	Predicted ORF in Assemblies 19, 20 and 21	MSB3	0.456048	0.0116809	55.2138	0.0115288	0.803087	0.464308	0.447788
3832	CUST_8380_PI362308700	orf19.7086	0	Ca21chr7_C_albicans_SC5314	55866	Predicted ORF in Assemblies 19, 20 and 21	KAP114	-0.861834	0.094416	12.909	0.0492176	0.791874	-0.795072	-0.928596
3911	CUST_3475_PI362308700	orf19.263.1	0	Ca21chr3_C_albicans_SC5314	588473	Predicted ORF in Assembly 20 and 21; gene has intron	0	0.583163	0.0380868	21.6536	0.0293793	0.791628	0.556231	0.610094
3921	CUST_1588_PI362308700	orf19.6195	0	Ca21chr1_C_albicans_SC5314	1516388	Predicted ORF in Assemblies 19, 20 and 21	RNH70	-0.394654	0.023367	23.8852	0.0266378	0.800438	-0.378131	-0.411177
3949	CUST_10642_PI362308700	orf19.6667	0	Ca21chr5_C_albicans_SC5314	797458	Predicted ORF in Assemblies 19, 20 and 21	SAP30	-0.390401	0.018678	29.5594	0.0215287	0.809639	-0.403608	-0.377193
3951	CUST_1247_PI362308700	orf19.5001	CUP2	Ca21chr1_C_albicans_SC5314	2999889	Protein required for normal resistance to copper; similar to S. cerevisiae Cup2p, which is a copper-binding transcription factor that activates transcription of metallothionein genes	HAA1	-1.14409	0.0569667	28.4023	0.0224052	0.805534	-1.10381	-1.18437
4030	CUST_9640_PI362308700	orf19.4649	ZCF27	Ca21chr4_C_albicans_SC5314	283245	Putative transcription factor with zinc cluster DNA-binding motif	OAF1	0.326592	0.0233569	19.7745	0.0321665	0.788723	0.310077	0.343108
4034	CUST_65_PI362308700	orf19.6068	SVF1	Ca21chr1_C_albicans_SC5314	63203	Predicted ORF in Assemblies 19, 20 and 21; fluconazole-induced; regulated by Gcn4p; repressed in response to amino acid starvation (3-aminotriazole treatment); fungal-specific (no human or murine homolog)	SVF1	0.175551	0.00495159	50.1387	0.0126955	0.778234	0.179052	0.172049
4038	CUST_5597_PI362308700	orf19.2454	PHO87	Ca21chr1_C_albicans_SC5314	1244696	Protein similar to phosphate permeases; transcription is negatively regulated by Rim101p at pH 8; expression is regulated upon white-opaque switching; caspofungin repressed; biofilm-regulated; virulence-group-correlated expression	PHO87|PHO90	-0.841654	0.0301775	39.4426	0.0161369	0.794534	-0.820316	-0.862993
4060	CUST_312_PI362308700	orf19.5484	SER1	Ca21chr2_C_albicans_SC5314	1268118	Predicted ORF in Assemblies 19, 20 and 21; protein detected by mass spec in exponential and stationary phase cultures	SER1	-1.64547	0.014311	162.605	0.00391509	0.786869	-1.65559	-1.63535
4062	CUST_8463_PI362308700	orf19.5528	MOB1	Ca21chr6_C_albicans_SC5314	529251	Predicted ORF in Assemblies 19, 20 and 21; periodic mRNA expression, peak at cell-cycle G2/M phase	MOB1	-0.436319	0.0447814	13.7791	0.0461209	0.796398	-0.404654	-0.467984
4066	CUST_7494_PI362308700	orf19.6514	CUP9	Ca21chr7_C_albicans_SC5314	450910	Protein of unknown function, upregulated in clinical isolates from HIV+ patients with oral candidiasis; transcription reduced upon yeast-hyphal switch; ketoconazole-induced; Plc1p-regulated; shows colony morphology-related Ssn6p regulation	CUP9	1.10352	0.0910036	17.1489	0.037081	0.798968	1.03917	1.16787
4070	CUST_6951_PI362308700	orf19.5343	ASH1	Ca21chr2_C_albicans_SC5314	2194673	GATA-like transcription factor; localizes to nuclei of daughter cells and hyphal tip cells; mRNA localization is mediated by binding to She3p; required for wild-type virulence and filamentous growth	ASH1	-0.570533	0.0404963	19.9241	0.0319254	0.795539	-0.541897	-0.599168
4098	CUST_11611_PI362308700	orf19.511	0	Ca21chrR_C_albicans_SC5314	947461	Predicted ORF in Assemblies 19, 20 and 21	NRK1	-1.02013	0.0820262	17.5881	0.0361572	0.795847	-0.96213	-1.07813
4111	CUST_3720_PI362308700	orf19.4295	0	Ca21chr5_C_albicans_SC5314	619739	Predicted ORF in Assemblies 19, 20 and 21	HIR2	-0.46711	5.4538e-05	12112.5	5.25588e-05	0.322186	-0.467148	-0.467071
4121	CUST_10098_PI362308700	orf19.4997	KIS2	Ca21chr1_C_albicans_SC5314	2990032	Scaffold protein of Snf1p complex; similar to S. cerevisiae Gal83p and Sip2p; interacts with Snf4p; interaction with Snf1p complex is regulated by carbon source, decreased on ethanol; N-terminal myristoylation; Hog1p-downregulated	SIP2	0.373483	0.00780874	67.6402	0.00941117	0.759085	0.367961	0.379004
4133	CUST_7187_PI362308700	orf19.3475	0	Ca21chr6_C_albicans_SC5314	486570	Described as a Gag-related protein; hyphal induced; downregulation correlates with clinical development of fluconazole resistance; repressed by nitric oxide, 17-beta-estradiol, ethynyl estradiol	0	1.00903	0.0671841	21.2398	0.0299508	0.787976	0.96152	1.05653
4135	CUST_9844_PI362308700	orf19.2775	IDI1	Ca21chr4_C_albicans_SC5314	450184	Predicted ORF in Assemblies 19, 20 and 21	IDI1	0.960388	0.0793062	17.126	0.0371306	0.797236	0.90431	1.01647
4159	CUST_8847_PI362308700	orf19.2214	0	Ca21chr2_C_albicans_SC5314	1568309	Predicted ORF in Assemblies 19, 20 and 21	MRPL7	0.843762	0.0297847	40.0628	0.0158872	0.798268	0.864823	0.822701
4163	CUST_8024_PI362308700	orf19.4817	RAM2	Ca21chr1_C_albicans_SC5314	2096717	Alpha subunit of heterodimeric protein geranylgeranyltransferase type I and farnesyltransferase; a-specific transcription; lovastatin and fluconazole regulated; GGTase I enzyme binds zinc, is Mg-dependent; Cdc42p is GGTase I substrate	RAM2	-0.584466	0.00121707	679.137	0.000937395	0.766164	-0.583606	-0.585327
4171	CUST_6703_PI362308700	orf19.5226	WRS1	Ca21chr1_C_albicans_SC5314	2697872	Putative tRNA-Trp synthetase; genes encoding ribosomal subunits, translation factors, and tRNA synthetases are downregulated upon phagocytosis by murine macrophage	WRS1	-0.18926	0.0123981	21.5883	0.029468	0.785387	-0.180493	-0.198027
4174	CUST_1004_PI362308700	orf19.6579	0	Ca21chr7_C_albicans_SC5314	313807	Predicted ORF in Assemblies 19, 20 and 21	0	0.680086	0.0258564	37.1973	0.0171106	0.806829	0.698369	0.661803
4180	CUST_6186_PI362308700	orf19.6268	0	Ca21chr1_C_albicans_SC5314	1369348	Predicted ORF in Assemblies 19, 20 and 21; decreased expression observed in an ssr1 homozygous null mutant	DSF2	-0.138906	0.00693558	28.324	0.022467	0.803049	-0.14381	-0.134002
4189	CUST_6485_PI362308700	orf19.7531	0	Ca21chrR_C_albicans_SC5314	25163	Predicted ORF in Assemblies 19, 20 and 21; transcription is induced upon yeast-hyphal transition; benomyl or caspofungin induced; protein detected by mass spec in stationary phase cultures	YMR090W	0.291543	0.0154517	26.6834	0.0238471	0.798812	0.280617	0.302469
4195	CUST_9428_PI362308700	orf19.3359	ARP8	Ca21chr1_C_albicans_SC5314	345579	Predicted ORF in Assemblies 19, 20 and 21; mutation confers hypersensitivity to toxic ergosterol analog, and to amphotericin B	ARP8	-1.04819	0.0887982	16.6936	0.0380901	0.799631	-1.11098	-0.985398
4233	CUST_2184_PI362308700	orf19.2866	0	Ca21chr4_C_albicans_SC5314	1487112	Predicted ORF in Assemblies 19, 20 and 21	0	0.394837	0.0362815	15.3903	0.0413068	0.797515	0.369182	0.420492
4245	CUST_9611_PI362308700	orf19.4650	ILV6	Ca21chr4_C_albicans_SC5314	280567	Putative regulatory subunit of acetolacetate synthase ; fungal-specific (no human or murine homolog); alkaline upregulated; regulated by Gcn2p and Gcn4p	ILV6	-1.02608	0.101297	14.3251	0.0443688	0.795265	-1.0977	-0.954448
4264	CUST_3926_PI362308700	orf19.498	0	Ca21chrR_C_albicans_SC5314	928322	Predicted ORF in Assemblies 19, 20 and 21; possibly an essential gene, disruptants not obtained by UAU1 method	NAM9	0.326871	0.0358147	12.9071	0.0492247	0.79095	0.352196	0.301547
4265	CUST_8184_PI362308700	orf19.4536	CYS4	Ca21chr1_C_albicans_SC5314	386296	Predicted enzyme of sulfur amino acid biosynthesis; antigenic in mouse; upregulated in biofilm; alkaline upregulated; macrophage/pseudohyphal-induced	CYS4	-0.301307	0.010089	42.2356	0.0150703	0.806818	-0.294173	-0.308441
4283	CUST_4677_PI362308700	orf19.4153	0	Ca21chr5_C_albicans_SC5314	353433	Predicted ORF in Assemblies 19, 20 and 21	ULA1	-0.556381	0.0252888	31.1142	0.0204537	0.798606	-0.538499	-0.574263
4288	CUST_9607_PI362308700	orf19.2478	0	Ca21chr1_C_albicans_SC5314	1198188	Predicted ORF in Assemblies 19, 20 and 21	0	0.695429	0.0450013	21.8546	0.0291095	0.791313	0.663609	0.72725
4301	CUST_9727_PI362308700	orf19.4117	0	Ca21chr2_C_albicans_SC5314	1234911	Protein not essential for viability	0	0.460657	0.0224969	28.9581	0.0219754	0.806642	0.476564	0.444749
4311	CUST_10783_PI362308700	orf19.2275	0	Ca21chr2_C_albicans_SC5314	1467917	Predicted ORF in Assemblies 19, 20 and 21	MNP1	0.444554	0.0059877	104.998	0.00606299	0.782445	0.448788	0.44032
4322	CUST_8604_PI362308700	orf19.3323	0	Ca21chr1_C_albicans_SC5314	263092	Predicted ORF in Assemblies 19, 20 and 21; possibly spurious ORF (Annotation Working Group prediction)	0	-0.262683	0.0140499	26.4408	0.0240657	0.791007	-0.252748	-0.272618
4329	CUST_10986_PI362308700	orf19.5291	0	Ca21chr4_C_albicans_SC5314	896739	Predicted ORF in Assemblies 19, 20 and 21	SCS3	0.203979	0.00273311	105.546	0.00603148	0.78666	0.202046	0.205911
4331	CUST_10123_PI362308700	orf19.4984	0	Ca21chr1_C_albicans_SC5314	2964525	Predicted ORF in Assemblies 19, 20 and 21	CTS2	1.11312	0.0713093	22.0756	0.0288185	0.79755	1.0627	1.16355
4344	CUST_7852_PI362308700	orf19.6527	0	Ca21chr7_C_albicans_SC5314	416612	Predicted ORF in Assemblies 19, 20 and 21; shows colony morphology-related gene regulation by Ssn6p; transcriptionally activated by Mnl1p under weak acid stress; possibly an essential gene, disruptants not obtained by UAU1 method	PRM10	-0.469262	0.0242743	27.339	0.0232757	0.806103	-0.486426	-0.452097
4373	CUST_1653_PI362308700	orf19.6160	0	Ca21chr3_C_albicans_SC5314	171341	Predicted ORF in Assemblies 19, 20 and 21	YMR031C	0.468162	0.0306631	21.5921	0.0294629	0.78696	0.489844	0.44648
4383	CUST_11953_PI362308700	orf19.7106	0	Ca21chr7_C_albicans_SC5314	21072	Predicted ORF in Assemblies 19, 20 and 21	VPS70	-1.28886	0.00230813	789.698	0.000806155	0.823622	-1.29049	-1.28723
4403	CUST_4801_PI362308700	orf19.681	HAP43	Ca21chr1_C_albicans_SC5314	2467031	CCAAT-binding factor (CBF)-dependent transcription factor required for iron-limitation response; similar to transcription factor AP-1; transcription is negatively regulated by Sfu1p; ciclopirox olamine induced	YAP3	-0.940499	0.00599977	221.686	0.0028717	0.818768	-0.936257	-0.944742
4427	CUST_5783_PI362308700	orf19.6124	ACE2	Ca21chrR_C_albicans_SC5314	1611848	Putative transcription factor involved in regulation of morphogenesis; required for wild-type cell separation, adherence, biofilm formation, and virulence in mouse; mutant is hyperfilamentous; similar to S. cerevisiae Ace2p and Swi5p	ACE2	-0.620733	0.0450595	19.482	0.0326487	0.79262	-0.588871	-0.652595
4454	CUST_11568_PI362308700	orf19.1089	PEX11	Ca21chr6_C_albicans_SC5314	953697	Putative protein involved in fatty acid oxidation; expression is Tac1p-dependent	PEX11	-0.827271	0.0113071	103.47	0.00615253	0.777629	-0.835267	-0.819276
4458	CUST_7879_PI362308700	orf19.2680	0	Ca21chr4_C_albicans_SC5314	649268	Predicted ORF in Assemblies 19, 20 and 21	DNF3	-0.490765	0.00534523	129.844	0.00490287	0.760875	-0.486985	-0.494544
4474	CUST_9153_PI362308700	orf19.346	0	Ca21chr3_C_albicans_SC5314	740760	Predicted ORF in Assemblies 19, 20 and 21; mutation confers hypersensitivity to 5-fluorocytosine (5-FC)	ALT1	-0.771229	0.0650942	16.7554	0.0379498	0.798052	-0.7252	-0.817257
4493	CUST_11495_PI362308700	orf19.1093	FLO8	Ca21chr6_C_albicans_SC5314	962185	Transcription factor; required for wild-type hyphal formation; regulates hyphal gene expression; required for virulence in mouse systemic infection; binds Efg1p; binds Mss11p via LisH motif; has LUFS domain; ortholog of S. cerevisiae Flo8p	FLO8	0.115663	0.00412538	39.6501	0.0160525	0.796778	0.112745	0.11858
4500	CUST_10563_PI362308700	orf19.1528	0	Ca21chr2_C_albicans_SC5314	416571	Predicted ORF in Assemblies 19, 20 and 21; possibly an essential gene, disruptants not obtained by UAU1 method	MTF1	0.321467	0.0199263	22.8152	0.0278855	0.79506	0.307377	0.335557
4506	CUST_9339_PI362308700	orf19.3374	ECE1	Ca21chr4_C_albicans_SC5314	727428	Protein of unknown function; hyphal-specific expression increases with extent of elongation of the cell; regulated by Rfg1p, Nrg1p, Tup1p, Cph1p, Efg1p, Hog1p, farnesol, phagocytosis; may contribute to biofilm formation	0	5.95386	0.264384	31.8477	0.0199829	0.800623	6.14081	5.76692
4511	CUST_1700_PI362308700	orf19.292	0	Ca21chr3_C_albicans_SC5314	636895	Predicted ORF in Assemblies 19, 20 and 21	0	0.427561	0.0181765	33.2662	0.0191314	0.817249	0.414708	0.440414
4521	CUST_10127_PI362308700	orf19.4982	0	Ca21chr1_C_albicans_SC5314	2962728	Predicted ORF in Assemblies 19, 20 and 21	TGL1	0.456827	0.0484087	13.3458	0.047613	0.787768	0.491057	0.422597
4535	CUST_3554_PI362308700	orf19.4778	LYS142	Ca21chr1_C_albicans_SC5314	2020314	Putative transcription factor with zinc cluster DNA-binding motif; has similarity to S. cerevisiae Lys14p, which is a transcription factor involved in the regulation of lysine biosynthesis genes; fungal-specific	LYS14	-0.237663	0.0087522	38.4024	0.0165739	0.793732	-0.243851	-0.231474
4556	CUST_7492_PI362308700	orf19.6515	HSP90	Ca21chr7_C_albicans_SC5314	439531	Essential chaperone of Hsp90 family, activated by heat shock and stress; regulates several signal transduction pathways; localizes to surface of hyphae, but not yeast-form cells; mediates echinocandin resistance	HSC82	-0.721792	0.040762	25.0421	0.0254084	0.79264	-0.692969	-0.750615
4579	CUST_5121_PI362308700	orf19.5804	HYU1	Ca21chr2_C_albicans_SC5314	601474	Protein described as hydantoin utilization protein A; induced upon adherence to polystyrene; regulated by Gcn2p and Gcn4p	YKL215C	-0.924558	0.0494464	26.4432	0.0240635	0.79306	-0.959522	-0.889595
4627	CUST_9952_PI362308700	orf19.2743	0	Ca21chr4_C_albicans_SC5314	533641	Predicted ORF in Assemblies 19, 20 and 21	RPH1	-0.439899	0.0332464	18.7122	0.0339894	0.787731	-0.416391	-0.463408
4631	CUST_7582_PI362308700	orf19.2137	0	Ca21chr6_C_albicans_SC5314	1005292	Predicted ORF in Assemblies 19, 20 and 21	0	-0.347314	0.011545	42.5445	0.0149609	0.804475	-0.339151	-0.355478
4640	CUST_2005_PI362308700	orf19.1746	0	Ca21chr2_C_albicans_SC5314	2129144	Predicted ORF in Assemblies 19, 20 and 21; similar to S. cerevisiae meiosis-specific, spore-wall-localized protein Ssp2p, which is required for wild-type outer spore wall formation in S. cerevisiae; possibly an essential gene (UAU1 method)	SSP2	-0.0439445	0.000806659	77.0423	0.00826279	0.744866	-0.0433741	-0.0445148
4659	CUST_7498_PI362308700	orf19.4339	VPS4	Ca21chr5_C_albicans_SC5314	687547	Protein involved in transport from multivesicular body (MVB) to the vacuole; mutation causes decreased SAP secretion and decreased virulence in murine intravenous infection; regulated by Gcn2p and Gcn4p	VPS4	-0.532171	0.0110966	67.8229	0.00938582	0.767135	-0.524324	-0.540017
4662	CUST_5837_PI362308700	orf19.791	RIM11	Ca21chr2_C_albicans_SC5314	899545	Protein not essential for viability; similar to S. cerevisiae Rim11p, which is a protein kinase involved in meiosis and sporulation; orf19.792 and orf19.791 overlap (see Locus History)	RIM11	0.241463	0.00844369	40.4421	0.0157383	0.80063	0.235492	0.247434
4671	CUST_11444_PI362308700	orf19.7638	PRO1	Ca21chrR_C_albicans_SC5314	2245865	Transcription is regulated by Nrg1p; regulated by Gcn2p and Gcn4p	PRO1	-1.17243	0.0774337	21.4127	0.0297094	0.786688	-1.11767	-1.22718
4686	CUST_7357_PI362308700	orf19.3767	0	Ca21chr1_C_albicans_SC5314	2723345	Predicted ORF in Assemblies 19, 20 and 21	PEP1	-0.955059	0.0570898	23.6584	0.0268928	0.798318	-0.995427	-0.91469
4743	CUST_1454_PI362308700	orf19.5701	0	Ca21chr6_C_albicans_SC5314	718017	Predicted ORF in Assemblies 19, 20 and 21	0	0.355215	0.0221925	22.636	0.028106	0.795794	0.339522	0.370907
4747	CUST_10492_PI362308700	orf19.3724	0	Ca21chrR_C_albicans_SC5314	538767	Predicted ORF in Assemblies 19, 20 and 21	UTP23	0.0953262	0.00326227	41.3245	0.0154024	0.803546	0.0930194	0.097633
4756	CUST_182_PI362308700	orf19.6036	RIC1	Ca21chr1_C_albicans_SC5314	119768	Protein not essential for viability; similar to S. cerevisiae Ric1p, which is a guanyl-nucleotide exchange factor	RIC1	-0.207196	0.0222888	13.1465	0.048332	0.786919	-0.222956	-0.191435
4760	CUST_1148_PI362308700	orf19.5030	0	Ca21chr1_C_albicans_SC5314	3066059	Predicted ORF in Assemblies 19, 20 and 21; induced during planktonic growth	DOS2	-1.34344	0.0643734	29.5139	0.0215619	0.805942	-1.38896	-1.29792
4776	CUST_6372_PI362308700	orf19.7551	ALO1	Ca21chrR_C_albicans_SC5314	2090795	D-Arabinono-1,4-lactone oxidase, involved in biosynthesis of dehydro-D-arabinono-1,4-lactone, which has a protective role against oxidative damage; required for full virulence in a mouse model of systemic infection	ALO1	-0.149287	0.0137211	15.3868	0.0413162	0.796441	-0.158989	-0.139585
4778	CUST_1110_PI362308700	orf19.7215	0	Ca21chr1_C_albicans_SC5314	3099412	Predicted ORF in Assemblies 19, 20 and 21	UTP10	0.450141	0.0388364	16.3917	0.0387898	0.804674	0.42268	0.477603
4784	CUST_11513_PI362308700	orf19.524	0	Ca21chrR_C_albicans_SC5314	968252	Predicted ORF in Assemblies 19, 20 and 21	0	-0.682147	0.0535192	18.0253	0.0352819	0.790778	-0.644303	-0.719991
4792	CUST_12029_PI362308700	orf19.7312	ERG13	Ca21chrR_C_albicans_SC5314	1952785	Similar to S. cerevisiae ergosterol biosynthesis protein Erg13p; transposon mutation affects filamentous growth; repressed by amphotericin B, caspofungin; detected by mass spectometry in exponential and stationary phase cultures	ERG13	-0.0983707	0.000522089	266.463	0.00238914	0.770812	-0.0980015	-0.0987399
4797	CUST_9502_PI362308700	orf19.4679	AGP2	Ca21chr4_C_albicans_SC5314	225566	Protein described as an amino acid permease; hyphal downregulated; regulated upon white-opaque switching; induced in core caspofungin response, during cell wall regeneration, or by flucytosine; fungal-specific (no human or murine homolog)	AGP2	1.94153	0.00643262	426.846	0.00149145	0.795007	1.93698	1.94608
4818	CUST_4067_PI362308700	orf19.5387	VPS8	Ca21chr3_C_albicans_SC5314	118538	Protein described as a vacuolar sorting protein; downregulated upon adherence to polystyrene	VPS8	-0.151105	0.0112823	18.9407	0.03358	0.790194	-0.159082	-0.143127
4822	CUST_6239_PI362308700	orf19.4077	MIT1	Ca21chr2_C_albicans_SC5314	1880524	Protein involved in sphingolipid biosynthesis; required for mannosylation of inositol phosphoceramide (IPC) to form mannosylated sphingolipids MIPC and M(IP)2C; fluconazole, caspofungin induced; macrophage-downregulated gene	SUR1	-1.32685	0.121833	15.4018	0.0412761	0.798177	-1.2407	-1.413
4823	CUST_7324_PI362308700	orf19.3773	0	Ca21chr4_C_albicans_SC5314	1080242	Putative RNAse III, ortholog of S. cerevisiae RNT1; predicted ORF in Assemblies 19, 20 and 21; merged with orf19.3772 in Assembly 21	0	0.524982	0.0212114	35.0018	0.0181833	0.810643	0.509984	0.539981
4837	CUST_11031_PI362308700	orf19.813	0	Ca21chr2_C_albicans_SC5314	858692	Predicted ORF in Assemblies 19, 20 and 21; not essential for viability; oxidative stress-induced via Cap1p; similar to S. cerevisiae Vhs3p, which is a putative phosphopantothenoylcysteine decarboxylase	0	0.343868	0.00363828	133.663	0.00476279	0.778558	0.341296	0.346441
4856	CUST_10207_PI362308700	orf19.4958	ECM25	Ca21chr1_C_albicans_SC5314	2902728	Non-essential protein involved in cell morphogenesis; predicted ORF in Assemblies 19, 20 and 21	ECM25	-0.282028	0.016569	24.072	0.0264313	0.80409	-0.270312	-0.293744
4862	CUST_1219_PI362308700	orf19.5016	0	Ca21chr1_C_albicans_SC5314	3031406	Protein not essential for viability	YAL044W-A	-0.476481	0.0306326	21.9977	0.0289204	0.796774	-0.454821	-0.498142
4868	CUST_5188_PI362308700	orf19.1433	0	Ca21chr2_C_albicans_SC5314	1695466	Predicted ORF in Assemblies 19, 20 and 21; shows colony morphology-related gene regulation by Ssn6p	LPX1	-1.42123	0.0750364	26.786	0.0237559	0.806778	-1.47429	-1.36817
4881	CUST_4601_PI362308700	orf19.6354	0	Ca21chr1_C_albicans_SC5314	2767100	Predicted ORF in Assemblies 19, 20 and 21; possibly spurious ORF (Annotation Working Group prediction)	0	-0.185441	0.0073327	35.7649	0.0177955	0.799168	-0.180256	-0.190626
4892	CUST_10325_PI362308700	orf19.3577	COQ5	Ca21chr2_C_albicans_SC5314	1120618	Protein described as methyltransferase of ubiquinone biosynthesis; regulated by Gcn4p; repressed in response to amino acid starvation (3-aminotriazole treatment); induced upon adherence to polystyrene	COQ5	0.21665	0.0083297	36.7827	0.0173033	0.803555	0.22254	0.21076
4895	CUST_10955_PI362308700	orf19.7478	0	Ca21chrR_C_albicans_SC5314	134047	Predicted ORF in Assemblies 19, 20 and 21	COQ1	0.168319	0.0115309	20.6436	0.0308145	0.787053	0.176473	0.160166
4896	CUST_11064_PI362308700	orf19.3553	RPF2	Ca21chr2_C_albicans_SC5314	1077167	Predicted ORF in Assemblies 19, 20 and 21; mutation confers hypersensitivity to 5-fluorocytosine (5-FC), 5-fluorouracil (5-FU), and tubercidin (7-deazaadenosine)	RPF2	1.21852	0.0443195	38.8824	0.0163693	0.796381	1.18718	1.24986
4900	CUST_3634_PI362308700	orf19.6938	MEU1	Ca21chr3_C_albicans_SC5314	794874	Predicted ORF in Assemblies 19, 20 and 21;protein level decreased in stationary phase cultures	MEU1	1.05061	0.0725917	20.4678	0.0310788	0.782395	0.999282	1.10194
4963	CUST_34_PI362308700	orf19.6078	POL93	Ca21chr1_C_albicans_SC5314	43804	Predicted ORF in retrotransposon Tca8 with similarity to the Pol region of retrotransposons encoding reverse transcriptase, protease and integrase; downregulated in response to ciclopirox olamine; induced upon biofilm formation	YIL080W	2.95144	0.0866755	48.1563	0.013218	0.775369	2.89016	3.01273
5020	CUST_7429_PI362308700	orf19.1575	PRS1	Ca21chr2_C_albicans_SC5314	503401	Phosphoribosylpyrophosphate synthetase; enzyme of purine, pyrimidine, histidine, and tryptophan biosynthesis; essential; flucytosine induced; macrophage/pseudohyphal-induced	PRS3	0.910263	0.0775684	16.5958	0.0383141	0.800222	0.855414	0.965112
5030	CUST_9530_PI362308700	orf19.2494	0	Ca21chr1_C_albicans_SC5314	1174271	Predicted ORF in Assemblies 19, 20 and 21	PET112	-0.398951	0.0333784	16.9032	0.0376188	0.799318	-0.422553	-0.375349
5035	CUST_460_PI362308700	orf19.4211	FET3	Ca21chr6_C_albicans_SC5314	89365	Multicopper oxidase; required for growth under low-iron conditions; null mutant shows decreased prostaglandin E2 production; functional homolog of S. cerevisiae Fet3p; ketoconazole, caspofungin, amphotericin B repressed	FET3	1.647	0.0457427	50.9197	0.0125008	0.785948	1.61465	1.67934
5083	CUST_11234_PI362308700	orf19.6313.2	MVB12	Ca21chrR_C_albicans_SC5314	1037082	Putative ESCRT-I complex subunit with a role in multivesicular body (MVB) trafficking; mutant displays growth defect on alkaline medium	0	0.389372	0.0117247	46.9654	0.013553	0.76926	0.381082	0.397663
5087	CUST_17_PI362308700	orf19.2560	CDC60	Ca21chrR_C_albicans_SC5314	387582	Cytosolic leucyl tRNA synthetase; has conserved amino acid and ATP binding class I signature, tRNA binding, and proofreading motifs; likely essential for growth; interacts with benzoxaborole antifungals; similar to S. cerevisiae Cdc60p	CDC60	-0.410106	0.043338	13.3827	0.0474823	0.78773	-0.440751	-0.379462
5124	CUST_9523_PI362308700	orf19.4670	CAS5	Ca21chr4_C_albicans_SC5314	241405	Putative zinc finger transcription factor; cell wall damage response; required for wild-type transcriptional response to caspofungin; mutant caspofungin hypersensitive; downregulated in core stress response; avirulent, reduced CFU in mice	MIG1	-0.363079	0.0124956	41.092	0.0154895	0.797904	-0.354243	-0.371914
5139	CUST_6596_PI362308700	orf19.319	0	Ca21chr3_C_albicans_SC5314	679081	Predicted ORF in Assemblies 19, 20 and 21	YDR286C	-0.549061	0.0566888	13.6974	0.0463951	0.792206	-0.589146	-0.508976
5157	CUST_8261_PI362308700	orf19.4516	0	Ca21chr2_C_albicans_SC5314	917707	Predicted ORF in Assemblies 19, 20 and 21	MET7	-0.479351	0.016169	41.9261	0.0151814	0.809237	-0.490784	-0.467917
5164	CUST_3139_PI362308700	orf19.150	0	Ca21chr2_C_albicans_SC5314	981178	Predicted ORF in Assemblies 19, 20 and 21	TIM17	0.999665	0.00874037	161.748	0.00393582	0.778276	1.00585	0.993485
5174	CUST_4699_PI362308700	orf19.6323	HPA2	Ca21chr6_C_albicans_SC5314	16593	Predicted ORF in Assemblies 19, 20 and 21	HPA3	-0.752242	0.0632051	16.8314	0.0377789	0.798568	-0.707549	-0.796935
5198	CUST_3609_PI362308700	orf19.4765	PGA6	Ca21chr1_C_albicans_SC5314	1978893	Putative GPI-anchored cell wall protein of unknown function; transcriptionally induced under high iron conditions; upregulated upon Als2p depletion; mRNA binds to She3p and is localized to hyphal tips	CCW12	0.450404	0.0405855	15.6945	0.0405085	0.798447	0.479103	0.421706
5229	CUST_1203_PI362308700	orf19.5025	MET3	Ca21chr1_C_albicans_SC5314	3051624	Putative ATP sulfurlyase of sulfate assimilation; repressed by Met or Cys, Sfu1p, or in fluconazole-resistant isolate; strongly induced on biofilm formation, even in presence of Met and Cys; Hog1p-, caspofungin-, possibly adherence-induced	MET3	-1.23497	0.0472009	37.0016	0.017201	0.804903	-1.26834	-1.20159
5275	CUST_2061_PI362308700	orf19.7032	0	Ca21chr7_C_albicans_SC5314	165660	Predicted ORF in Assemblies 19, 20 and 21	0	1.82387	0.00191035	1350.19	0.000471503	0.825805	1.82522	1.82251
5276	CUST_10313_PI362308700	orf19.5754	0	Ca21chr6_C_albicans_SC5314	824678	Predicted ORF in Assemblies 19, 20 and 21; fluconazole-induced	IZH3	-0.484146	0.0508421	13.4669	0.0471863	0.788153	-0.520096	-0.448195
5306	CUST_5136_PI362308700	orf19.3625	0	Ca21chr2_C_albicans_SC5314	1727787	Predicted ORF in Assemblies 19, 20 and 21	YNG1	0.667708	0.0256828	36.7671	0.0173107	0.800863	0.685869	0.649548
5308	CUST_5094_PI362308700	orf19.215	0	Ca21chr2_C_albicans_SC5314	1816129	Predicted ORF in Assemblies 19, 20 and 21	AVO2	0.796238	0.0833531	13.5094	0.0470384	0.787828	0.855178	0.737299
5315	CUST_9192_PI362308700	orf19.5266	0	Ca21chr1_C_albicans_SC5314	2626184	Predicted ORF in Assemblies 19, 20 and 21	0	1.26878	0.140568	12.7648	0.0497715	0.791438	1.36818	1.16938
5322	CUST_2498_PI362308700	orf19.4792	0	Ca21chr1_C_albicans_SC5314	2051811	Predicted ORF in Assemblies 19, 20 and 21; Plc1p-regulated; possibly spurious ORF (Annotation Working Group prediction)	0	0.861143	0.0845454	14.4046	0.0441249	0.795547	0.920925	0.80136
5332	CUST_11997_PI362308700	orf19.6691	0	Ca21chr7_C_albicans_SC5314	798693	Predicted ORF in Assemblies 19, 20 and 21	YHR032W	-0.139866	0.00253787	77.9396	0.00816767	0.752899	-0.138072	-0.141661
5336	CUST_1400_PI362308700	orf19.6489	FMP45	Ca21chr7_C_albicans_SC5314	487109	Protein induced during the mating process; mutation confers hypersensitivity to toxic ergosterol analog and to amphotericin B; alkaline downregulated; repressed by alpha pheromone in SpiderM medium; possibly essential gene (by UAU1 method)	FMP45	-0.0466979	0.00249563	26.4626	0.0240459	0.794616	-0.0484626	-0.0449333
5337	CUST_7658_PI362308700	orf19.3898	0	Ca21chr5_C_albicans_SC5314	927296	Predicted ORF in Assemblies 19, 20 and 21	TLG1	-0.297386	0.0212485	19.7928	0.032137	0.789578	-0.282361	-0.312411
5360	CUST_3471_PI362308700	orf19.3670	GAL1	Ca21chr1_C_albicans_SC5314	450824	Galactokinase; transcription regulated by galactose; transcription regulated by Mig1p and Tup1p; not required for systemic mouse virulence; farnesol-downregulated in biofilm; fluconazole-induced	GAL3	1.94474	0.063151	43.5508	0.0146153	0.807134	1.90008	1.98939
5370	CUST_1729_PI362308700	orf19.7387	ELP3	Ca21chr3_C_albicans_SC5314	1376657	Predicted ORF in Assemblies 19, 20 and 21	ELP3	0.5788	0.0146673	55.8075	0.0114062	0.803678	0.589171	0.568429
5417	CUST_9880_PI362308700	orf19.4940	0	Ca21chr1_C_albicans_SC5314	2868423	Putative histidine permease; fungal-specific (no human or murine homolog)	HIP1	0.837654	0.016201	73.1205	0.0087059	0.736099	0.826199	0.84911
5462	CUST_2125_PI362308700	orf19.2896	SOU1	Ca21chr4_C_albicans_SC5314	1418888	Enzyme involved in utilization of L-sorbose; has sorbitol dehydrogenase, fructose reductase, and sorbose reductase activities; has NAD-binding site motif; transcriptional regulation affected by chromosome 5 copy number	SPS19	2.64667	0.027872	134.291	0.00474052	0.785388	2.62696	2.66638
5537	CUST_4968_PI362308700	orf19.7344	0	Ca21chrR_C_albicans_SC5314	2023763	Predicted ORF in Assemblies 19, 20 and 21	HDA3	4.69409	0.0302594	219.385	0.00290182	0.808554	4.6727	4.71549
5543	CUST_9501_PI362308700	orf19.4679	AGP2	Ca21chr4_C_albicans_SC5314	225566	Protein described as an amino acid permease; hyphal downregulated; regulated upon white-opaque switching; induced in core caspofungin response, during cell wall regeneration, or by flucytosine; fungal-specific (no human or murine homolog)	AGP2	1.44954	0.00815373	251.414	0.00253214	0.757172	1.45531	1.44378
5550	CUST_5559_PI362308700	orf19.6816	0	Ca21chr3_C_albicans_SC5314	1573419	Predicted ORF in Assemblies 19, 20 and 21	YJR096W	-0.269624	0.00745222	51.1668	0.0124405	0.79026	-0.274894	-0.264355
5570	CUST_186_PI362308700	orf19.6034	TUB2	Ca21chr1_C_albicans_SC5314	125597	Beta-tubulin; functional homolog of ScTub2p; hyphal-induced; fluconazole-induced; gene has two introns; overproduction causes inviability in S. cerevisiae; slow growth, increased white-to opaque switching in ectopic expression strains	TUB2	0.280136	0.0260542	15.2057	0.041807	0.792201	0.261713	0.298559
5571	CUST_6515_PI362308700	orf19.3171	ACH1	Ca21chr5_C_albicans_SC5314	448569	Acetyl-coA hydrolase; acetate utilization; nonessential; soluble protein in hyphae; antigenic in human; induced on polystyrene adherence; farnesol-, ketoconazole-induced; no human or murine homolog	ACH1	1.00764	0.0789569	18.048	0.0352376	0.791233	1.06347	0.951808
5576	CUST_11327_PI362308700	orf19.1477	0	Ca21chr2_C_albicans_SC5314	298785	Predicted ORF in Assemblies 19, 20 and 21	YGL010W	-0.297161	0.00497135	84.5342	0.00753056	0.775838	-0.300676	-0.293646
5585	CUST_2598_PI362308700	orf19.1203	SRO77	Ca21chr6_C_albicans_SC5314	73882	Predicted ORF in Assemblies 19, 20 and 21; filament induced; fungal-specific (no human or murine homolog)	SRO77	-0.367507	0.0336689	15.4366	0.0411834	0.797643	-0.3437	-0.391315
5598	CUST_7572_PI362308700	orf19.4316	0	Ca21chr5_C_albicans_SC5314	648551	Trimethyllysine dioxygenase, the first enzyme in the carnitine biosynthesis pathway; hyphal-induced expression, regulated by Cyr1p, Ras1p, Efg1p	AIM17	0.358826	0.00923102	54.973	0.0115793	0.802047	0.352299	0.365354
5599	CUST_5356_PI362308700	orf19.2314	0	Ca21chr1_C_albicans_SC5314	2426899	Predicted ORF in Assemblies 19, 20 and 21; mutation confers hypersensitivity to 5-fluorocytosine (5-FC), 5-fluorouracil (5-FU), and tubercidin (7-deazaadenosine)	CGR1	0.532907	0.0552802	13.6332	0.046613	0.78933	0.493818	0.571996
5610	CUST_9375_PI362308700	orf19.5542	SAP6	Ca21chr6_C_albicans_SC5314	559567	Secreted aspartyl proteinase; expressed during hyphal growth, oral carriage, infection; sap4 sap5 sap6 triple mutant is defective in protein utilization as N source; assessment of virulence role complicated by URA3 effects	BAR1	1.67562	0.085282	27.7864	0.0229013	0.799916	1.73592	1.61531
5615	CUST_1897_PI362308700	orf19.1765	0	Ca21chr2_C_albicans_SC5314	2088810	Predicted ORF in Assemblies 19, 20 and 21	0	-0.220732	0.00101484	307.596	0.00206965	0.906212	-0.220014	-0.22145
5618	CUST_3127_PI362308700	orf19.1957	CYC3	Ca21chr5_C_albicans_SC5314	261888	Cytochrome c heme lyase, mitochondrial; gene also encodes antigenic cell-wall protein; mRNA more abundant in filaments than yeast-form; induced on polystyrene adherence, interaction with macrophage; N-glycosylation, 2 heme-binding motifs	CYC3	0.373165	0.0144263	36.5814	0.0173985	0.798897	0.383366	0.362964
5663	CUST_2760_PI362308700	orf19.4018	0	Ca21chr5_C_albicans_SC5314	1148441	Predicted ORF in Assemblies 19, 20 and 21	RSM7	0.495211	0.0518235	13.5138	0.0470231	0.78865	0.458566	0.531856
5698	CUST_8533_PI362308700	orf19.3337	0	Ca21chr1_C_albicans_SC5314	299627	Predicted ORF in Assemblies 19, 20 and 21	0	-0.0414579	0.000435862	134.516	0.00473258	0.794814	-0.0417661	-0.0411497
5707	CUST_6210_PI362308700	orf19.4084	KIS1	Ca21chr2_C_albicans_SC5314	1892346	Scaffold protein of Snf1p complex; similar to S. cerevisiae Gal83p and Sip2p with regions of similarity to Sip1p (ASC and KIS domain); interacts with Snf4p; null mutants are hypersensitive to caspofungin and hydrogen peroxide medium	GAL83	-0.137158	0.0126895	15.2859	0.0415882	0.795431	-0.146131	-0.128185
5722	CUST_8087_PI362308700	orf19.6730	0	Ca21chr3_C_albicans_SC5314	1734744	Predicted ORF in Assemblies 19, 20 and 21	YCR016W	0.16247	0.0156209	14.709	0.0432145	0.793128	0.151425	0.173516
5730	CUST_3823_PI362308700	orf19.2090	0	Ca21chr2_C_albicans_SC5314	62936	Predicted ORF in Assemblies 19, 20 and 21	ECM16	1.01081	0.0833186	17.1571	0.0370634	0.799995	1.06973	0.951898
5746	CUST_3258_PI362308700	orf19.1936	SNF1	Ca21chr5_C_albicans_SC5314	294667	Essential protein; functional homolog of S. cerevisiae Snf1p regulator of sugar metabolism; constitutively expressed; Thr208 phosphorylation may have regulatory role; up-regulation associated with azole resistance; has polyhistidine tract	SNF1	-0.0594509	0.00560416	15.0025	0.0423716	0.789478	-0.0634137	-0.0554882
5760	CUST_1_PI362308700	orf19.4743	AFG1	Ca21chr1_C_albicans_SC5314	1926159	Protein not essential for viability; similar to S. cerevisiae Afg1p, which is a putative mitochondrial ATPase of the AAA family	AFG1	1.04344	0.0675037	21.8603	0.0291019	0.794632	0.995709	1.09117
5762	CUST_39_PI362308700	orf19.6076	0	Ca21chr1_C_albicans_SC5314	48514	Predicted ORF in Assemblies 19, 20 and 21	VPS29	0.353647	0.00903953	55.3273	0.0115052	0.80602	0.360039	0.347255
5776	CUST_869_PI362308700	orf19.1725	0	Ca21chr3_C_albicans_SC5314	271593	Predicted ORF in Assemblies 19, 20 and 21	0	0.158007	0.0158671	14.083	0.0451292	0.793808	0.146787	0.169226
5782	CUST_2801_PI362308700	orf19.4004	CCT3	Ca21chr5_C_albicans_SC5314	1127833	Predicted ORF in Assemblies 19, 20 and 21; mutation confers hypersensitivity to cytochalasin D	CCT3	0.284336	0.0268257	14.9898	0.0424074	0.788945	0.303304	0.265367
5809	CUST_8280_PI362308700	orf19.3996	0	Ca21chr5_C_albicans_SC5314	1104781	Putative mannosyltransferase; similar to S. cerevisiae Gpi10p; has HKEXRF motif	GPI10	0.265502	0.00408553	91.904	0.00692673	0.793661	0.262613	0.268391
5814	CUST_4065_PI362308700	orf19.5388	SWD1	Ca21chr3_C_albicans_SC5314	118292	Predicted ORF in Assemblies 19, 20 and 21	SWD1	-0.132889	0.00538277	34.9139	0.018229	0.806815	-0.136695	-0.129083
5832	CUST_10728_PI362308700	orf19.2289	ARP3	Ca21chr2_C_albicans_SC5314	1488790	Predicted ORF in Assemblies 19, 20 and 21; shows Myo5p-dependent localization to cortical actin patches at hyphal tip; mutation confers hypersensitivity to cytochalasin D	ARP3	-0.385185	0.00564502	96.4981	0.00659699	0.785234	-0.381193	-0.389177
5847	CUST_2468_PI362308700	orf19.6980	0	Ca21chr3_C_albicans_SC5314	1205810	Predicted ORF in Assemblies 19, 20 and 21	YDL025C	-0.475009	0.0338985	19.817	0.0320978	0.791788	-0.451039	-0.498979
5863	CUST_7825_PI362308700	orf19.4354	MCM2	Ca21chrR_C_albicans_SC5314	856674	Phosphorylated protein of unknown function; transcription is periodic with a peak at M/G1 phase of the cell cycle; predicted ORF in Assemblies 19, 20 and 21	MCM2	-0.412904	0.0208621	27.9902	0.0227347	0.798645	-0.427656	-0.398152
5890	CUST_11955_PI362308700	orf19.7105	FAR1	Ca21chr7_C_albicans_SC5314	23536	Protein involved in regulation of pheromone-mediated mating; repressed by A1p and Alpha2p in white-phase cells; null mutant shows no pheromone response in opaque cells; overexpression causes enhanced pheromone response and cell cycle arrest	FAR1	-0.0437476	0.00390441	15.8458	0.0401228	0.797253	-0.0409867	-0.0465084
5903	CUST_7271_PI362308700	orf19.3460	0	Ca21chr6_C_albicans_SC5314	458642	Putative protein of unknown function; mRNA binds to She3p; transcription is regulated upon yeast-hyphal switch	0	-0.757946	0.025771	41.5932	0.0153029	0.801768	-0.739723	-0.776169
5920	CUST_2815_PI362308700	orf19.882	HSP78	Ca21chr2_C_albicans_SC5314	709618	Putative heat-shock protein; transcriptionally regulated by macrophage response; transcription is regulated by Nrg1p, Mig1p, Gcn2p, Gcn4p, Mnl1p; heavy metal (cadmium) stress-induced	HSP78	-0.385547	0.0336427	16.207	0.0392309	0.805646	-0.361758	-0.409336
5931	CUST_9709_PI362308700	orf19.4128	0	Ca21chr2_C_albicans_SC5314	1010792	Predicted ORF in Assemblies 19, 20 and 21	YOR059C	-0.305667	0.0105937	40.8051	0.0155983	0.800149	-0.313158	-0.298176
5945	CUST_11014_PI362308700	orf19.5288	IFE2	Ca21chrR_C_albicans_SC5314	1149961	Protein described as an alcohol dehydrogenase; decreased expression in hyphae compared to yeast-form cells; Efg1p-regulated; fluconazole-induced; Hog1p-induced; increased expression in response to prostaglandins	BDH1	-0.566879	0.023248	34.4841	0.0184561	0.805237	-0.55044	-0.583317
5952	CUST_7630_PI362308700	orf19.2112	0	Ca21chr2_C_albicans_SC5314	27586	Predicted ORF in Assemblies 19, 20 and 21	PRP18	0.621143	0.0238297	36.8628	0.0172657	0.80486	0.604293	0.637993
5974	CUST_3243_PI362308700	orf19.7237	0	Ca21chr1_C_albicans_SC5314	3145510	Predicted ORF in Assemblies 19, 20 and 21	BNA7	-0.32871	0.0168352	27.6127	0.0230453	0.802656	-0.316806	-0.340615
5975	CUST_4191_PI362308700	orf19.4897	0	Ca21chr1_C_albicans_SC5314	2268407	Predicted ORF in Assemblies 19, 20 and 21	SFH5	-0.200594	0.0159164	17.8233	0.035681	0.793919	-0.18934	-0.211849
5984	CUST_5793_PI362308700	orf19.6116	GLK4	Ca21chrR_C_albicans_SC5314	1625505	Protein described as a glucokinase; decreased expression in hyphae compared to yeast-form cells	GLK1	-1.2133	0.0340182	50.4397	0.0126198	0.777479	-1.23735	-1.18924
6004	CUST_11301_PI362308700	orf19.596.2	0	Ca21chrR_C_albicans_SC5314	1752120	Predicted ORF in Assembly 20 and 21; gene has intron	DAD4	-0.377719	0.0291865	18.3021	0.0347493	0.791872	-0.357081	-0.398357
6031	CUST_5431_PI362308700	orf19.7184	0	Ca21chr7_C_albicans_SC5314	868566	Predicted ORF in Assemblies 19, 20 and 21	VPS55	0.16316	0.00375029	61.5268	0.0103461	0.787848	0.160508	0.165812
6046	CUST_4756_PI362308700	orf19.6008	0	Ca21chr3_C_albicans_SC5314	1166751	Predicted ORF in Assemblies 19, 20 and 21; transcription is repressed in response to alpha pheromone in SpiderM medium	YLL032C	-1.01457	0.0612688	23.4184	0.0271681	0.791165	-0.971246	-1.05789
6048	CUST_895_PI362308700	orf19.7017	YOX1	Ca21chr7_C_albicans_SC5314	206040	Predicted ORF in Assemblies 19, 20 and 21; periodic mRNA expression, peak at cell-cycle G1/S phase	YOX1	-0.239107	0.0191711	17.6384	0.0360542	0.796441	-0.252663	-0.225551
6050	CUST_3800_PI362308700	orf19.4274	PUT1	Ca21chr5_C_albicans_SC5314	580957	Alkaline upregulated by Rim101p	PUT1	1.79225	0.038808	65.3119	0.00974662	0.751532	1.76481	1.81969
6058	CUST_11221_PI362308700	orf19.1789.1	LYS1	Ca21chr4_C_albicans_SC5314	1159049	Saccharopine dehydrogenase (biosynthetic); enzyme of alpha-aminoadipate lysine biosynthesis pathway; functionally complements S. cerevisiae lys1 mutation; fungal-specific (no human or murine homolog)	LYS1	-1.33472	0.11834	15.9504	0.0398602	0.797204	-1.4184	-1.25104
6069	CUST_744_PI362308700	orf19.1267	0	Ca21chr4_C_albicans_SC5314	1288486	Predicted ORF in Assemblies 19, 20 and 21	CAJ1	-0.606978	0.0417964	20.5376	0.0309733	0.784573	-0.577423	-0.636532
6076	CUST_3058_PI362308700	orf19.169	CHO2	Ca21chrR_C_albicans_SC5314	566055	Putative phosphatidyl-ethanolamine N-methyltransferase; fungal-specific (no human or murine homolog); amphotericin B repressed	CHO2	1.03292	0.077705	18.799	0.0338327	0.788573	0.977977	1.08787
6107	CUST_6471_PI362308700	orf19.434	PRD1	Ca21chr1_C_albicans_SC5314	1115479	Transcription is regulated by Nrg1p, Mig1p, and Tup1p; Hog1p-induced	PRD1	-0.80199	0.0313887	36.1336	0.017614	0.802781	-0.779795	-0.824185
6110	CUST_1415_PI362308700	orf19.59	REI1	Ca21chr1_C_albicans_SC5314	1058088	Predicted ORF in Assemblies 19, 20 and 21; decreased expression in response to prostaglandins	REI1	-0.262541	0.00196828	188.636	0.00337483	0.827507	-0.263932	-0.261149
6125	CUST_5421_PI362308700	orf19.1888	0	Ca21chr2_C_albicans_SC5314	1518360	Predicted ORF in Assemblies 19, 20 and 21	URH1	0.438188	0.000348639	1777.46	0.000358162	0.878214	0.438435	0.437942
6149	CUST_6719_PI362308700	orf19.2081	0	Ca21chr2_C_albicans_SC5314	70672	Predicted ORF in Assemblies 19, 20 and 21	POM152	0.45901	0.0246329	26.3525	0.0241463	0.791534	0.441592	0.476428
6181	CUST_1886_PI362308700	orf19.3941	URA7	Ca21chr5_C_albicans_SC5314	995477	Predicted ORF in Assemblies 19, 20 and 21; flucytosine induced; protein detected by mass spec in exponential and stationary phase cultures	URA7	-0.774774	0.0705252	15.5362	0.04092	0.798852	-0.824643	-0.724905
6206	CUST_5430_PI362308700	orf19.1886	RCL1	Ca21chr2_C_albicans_SC5314	1522721	Predicted ORF in Assemblies 19, 20 and 21; essential; downregulated during core stress response; S. cerevisiae ortholog is essential	RCL1	0.831297	0.00184199	638.241	0.000997458	0.764302	0.8326	0.829995
6209	CUST_8633_PI362308700	orf19.3314	0	Ca21chr1_C_albicans_SC5314	252497	Predicted ORF in Assemblies 19, 20 and 21	TRS20	0.675934	0.0441518	21.6506	0.0293833	0.789998	0.644714	0.707154
6217	CUST_9813_PI362308700	orf19.969	0	Ca21chr5_C_albicans_SC5314	43421	Predicted ORF in Assemblies 19, 20 and 21	PRS1	0.0876669	0.00225837	54.8979	0.0115952	0.798632	0.0892639	0.08607
6222	CUST_2018_PI362308700	orf19.1743	ACS1	Ca21chr2_C_albicans_SC5314	2134268	Putative acetyl-CoA synthetase, similar to S. cerevisiae Acs1p; upregulated in the presence of human neutrophils; fluconazole-downregulated; regulated by Nrg1p and Mig1p; shows colony morphology-related gene regulation by Ssn6p	ACS1	1.21979	0.0729258	23.6549	0.0268968	0.79459	1.27136	1.16823
6249	CUST_9571_PI362308700	orf19.2485	0	Ca21chr1_C_albicans_SC5314	1187646	Predicted ORF in Assemblies 19, 20 and 21	NUP170	-0.233607	0.0124129	26.6152	0.0239082	0.796505	-0.22483	-0.242385
6251	CUST_11755_PI362308700	orf19.1664	0	Ca21chr3_C_albicans_SC5314	402554	Predicted ORF in Assemblies 19, 20 and 21; decreased expression observed in an ssr1 homozygous null mutant	0	-0.845308	0.0514049	23.2555	0.0273582	0.789203	-0.881656	-0.808959
6261	CUST_6803_PI362308700	orf19.4242	CST20	Ca21chr5_C_albicans_SC5314	521587	Protein kinase of Ste20p/p65PAK family, required for wild-type mating efficiency and virulence in a mouse model; Cst20p-Hst7p-Cek1p-Cph1p MAPK pathway regulates some hyphal growth; involved in Cdc42p growth regulation	STE20	0.86616	0.0396945	30.8591	0.0206227	0.800108	0.838092	0.894228
6269	CUST_5802_PI362308700	orf19.6113	0	Ca21chr1_C_albicans_SC5314	8908	Predicted ORF in Assemblies 19, 20 and 21; transcription detected in high-resolution tiling array experiments	0	1.30376	0.136427	13.515	0.0470192	0.789664	1.20729	1.40023
6278	CUST_7040_PI362308700	orf19.406	ERG1	Ca21chr1_C_albicans_SC5314	1882136	Squalene epoxidase, catalyzes epoxidation of squalene to 2,3(S)-oxidosqualene in the ergosterol biosynthetic pathway; essential; target of allylamine antifungal drugs; uses NADH as a reducing cofactor, while S. cerevisiae Erg1p uses NADPH	ERG1	-0.865575	0.0314496	38.9229	0.0163523	0.798723	-0.887813	-0.843337
6309	CUST_9560_PI362308700	orf19.4664	NAT4	Ca21chr4_C_albicans_SC5314	250950	Putative histone acetyltransferase, involved in regulation of white-opaque switching; predicted ORF in Assemblies 19, 20 and 21	NAT4	-1.23571	0.00213659	817.916	0.000778343	0.954248	-1.2342	-1.23722
6312	CUST_2107_PI362308700	orf19.1108	HAM1	Ca21chr5_C_albicans_SC5314	846299	Predicted ORF in Assemblies 19, 20 and 21; caspofungin repressed; regulated by Gcn2p and Gcn4p	HAM1	-1.04599	0.0710293	20.8259	0.0305452	0.79005	-0.995763	-1.09621
6319	CUST_4130_PI362308700	orf19.3128	0	Ca21chr4_C_albicans_SC5314	1518395	Predicted ORF in Assemblies 19, 20 and 21	SLY1	-0.152554	0.000309073	698.033	0.000912019	0.860104	-0.152335	-0.152772
6344	CUST_1102_PI362308700	orf19.7217	RPL4B	Ca21chr1_C_albicans_SC5314	3107870	Putative ribosomal protein; genes encoding cytoplasmic ribosomal subunits, translation factors, and tRNA synthetases are downregulated upon phagocytosis by murine macrophage	RPL4B	0.27873	0.00592568	66.5214	0.00956943	0.747269	0.27454	0.282921
6349	CUST_2185_PI362308700	orf19.2863	0	Ca21chrR_C_albicans_SC5314	690263	Predicted ORF in Assemblies 19, 20 and 21; possibly spurious ORF (Annotation Working Group prediction)	0	-0.760647	0.00891583	120.653	0.00527635	0.743541	-0.766951	-0.754343
6366	CUST_11486_PI362308700	orf19.3272	0	Ca21chrR_C_albicans_SC5314	191184	Predicted ORF in Assemblies 19, 20 and 21	STI1	0.523273	0.0228867	32.3341	0.0196825	0.812484	0.50709	0.539456
6400	CUST_8099_PI362308700	orf19.4551	CTN1	Ca21chr1_C_albicans_SC5314	357096	Predicted carnitine acetyl transferase; required for growth on nonfermentable carbon sources but not for hyphal growth or virulence in mouse systemic model; transcription induced in macrophage; macrophage/pseudohyphal-repressed after 16 hr	YAT1	2.27969	0.156204	20.6395	0.0308207	0.785575	2.16924	2.39015
6411	CUST_12093_PI362308700	orf19.5125	0	Ca21chr7_C_albicans_SC5314	715230	Predicted ORF in Assemblies 19, 20 and 21; expression regulated during planktonic growth	YLR149C	0.7049	0.0635806	15.679	0.0405485	0.797952	0.749858	0.659941
6445	CUST_8884_PI362308700	orf19.1075	0	Ca21chr6_C_albicans_SC5314	924998	Predicted ORF in Assemblies 19, 20 and 21; possibly spurious ORF (Annotation Working Group prediction)	0	-1.28534	0.137551	13.2151	0.0480821	0.789138	-1.18808	-1.3826
6457	CUST_956_PI362308700	orf19.5943.1	0	Ca21chr3_C_albicans_SC5314	1024520	Putative protein of unknown function, transcription is upregulated in an RHE model of oral candidiasis; ORF Predicted by Annotation Working Group	STM1	-0.191567	0.0199207	13.5998	0.046727	0.79017	-0.177481	-0.205653
6467	CUST_1028_PI362308700	orf19.4393	CIT1	Ca21chrR_C_albicans_SC5314	777837	Protein described as citrate synthase; soluble protein in hyphae; biofilm induced; expression greater in high iron; upregulated upon phagocytosis; Hog1p-downregulated; regulated by Efg1p under yeast-form but not hyphal growth conditions	CIT1	1.9716	0.0640524	43.531	0.0146219	0.803878	2.0169	1.92631
6468	CUST_4834_PI362308700	orf19.5591	ADO1	Ca21chr6_C_albicans_SC5314	647819	Putative protein of unknown function; heterozygous null mutant exhibits resistance to cordycepin in the C. albicans fitness test; ketoconazole-induced; protein level decreased in stationary phase cultures	ADO1	0.634498	0.0219903	40.8051	0.0155984	0.796817	0.618948	0.650047
6471	CUST_10280_PI362308700	orf19.5760	IHD1	Ca21chr6_C_albicans_SC5314	839640	Putative GPI-anchored protein of unknown function; alkaline upregulated; greater transcription in hyphal form than yeast form; regulated by Nrg1p, Rfg1p, Tup1p; regulated by Tsa1p, Tsa1Bp in minimal media at 37; not essential for viability	0	3.25981	0.0457067	100.862	0.00631159	0.7738	3.29213	3.22749
6511	CUST_8375_PI362308700	orf19.1789	0	Ca21chr4_C_albicans_SC5314	1156891	Predicted ORF in Assemblies 19, 20 and 21	YJR003C	0.15188	0.0101067	21.2524	0.0299331	0.789205	0.144734	0.159027
6523	CUST_1249_PI362308700	orf19.5000	CYB2	Ca21chr1_C_albicans_SC5314	2997207	Protein described as precursor protein of cytochrome b2; transcriptionally regulated by iron; expression greater in high iron; alkaline downregulated; shows colony morphology-related gene regulation by Ssn6p	CYB2	-1.06432	0.0878872	17.1261	0.0371302	0.798626	-1.00217	-1.12646
6550	CUST_6291_PI362308700	orf19.6236	0	Ca21chr1_C_albicans_SC5314	1442123	Predicted ORF in Assemblies 19, 20 and 21	NOP6	0.417757	0.00693145	85.2344	0.0074687	0.782618	0.422659	0.412856
6569	CUST_1022_PI362308700	orf19.4396	0	Ca21chrR_C_albicans_SC5314	784374	Predicted ORF in Assemblies 19, 20 and 21	FCJ1	0.24243	0.023674	14.482	0.0438896	0.793637	0.22569	0.25917
6574	CUST_238_PI362308700	orf19.577	0	Ca21chr5_C_albicans_SC5314	178140	Predicted ORF in Assemblies 19, 20 and 21	YDL057W	-0.364623	0.0292333	17.6393	0.0360523	0.797837	-0.385294	-0.343952
6576	CUST_10031_PI362308700	orf19.3215	0	Ca21chr5_C_albicans_SC5314	872183	Predicted ORF in Assemblies 19, 20 and 21; transcription is repressed in response to alpha pheromone in SpiderM medium	YDL012C	-0.777103	0.0612171	17.9523	0.0354251	0.792539	-0.733816	-0.82039
6582	CUST_4678_PI362308700	orf19.4153	0	Ca21chr5_C_albicans_SC5314	353433	Predicted ORF in Assemblies 19, 20 and 21	ULA1	-0.41862	0.0361902	16.3585	0.0388684	0.804943	-0.44421	-0.393029
6589	CUST_8470_PI362308700	orf19.5525	0	Ca21chr6_C_albicans_SC5314	524631	Protein abundance is affected by URA3 expression in the CAI-4 strain background; regulated by Efg1p and Efh1p; repressed by Rgt1p; protein detected by mass spec in exponential and stationary phase cultures	YMR315W	-0.808784	0.0818738	13.9702	0.0454923	0.789993	-0.75089	-0.866677
6603	CUST_2901_PI362308700	orf19.2400	0	Ca21chrR_C_albicans_SC5314	724234	Predicted ORF in Assemblies 19, 20 and 21	SQS1	-0.661761	0.071181	13.1478	0.0483273	0.787889	-0.712093	-0.611428
6628	CUST_10456_PI362308700	orf19.3732	ERG25	Ca21chrR_C_albicans_SC5314	527711	Putative C-4 methyl sterol oxidase with role in C4-demethylation of ergosterol biosynthesis intermediates, based on similarity to S. cerevisiae Erg25p; fluconazole-induced; upregulated in biofilm and in azole-resistant strain	ERG25	-0.125474	0.0133458	13.2961	0.0477901	0.787509	-0.116037	-0.134911
6658	CUST_9975_PI362308700	orf19.2738	SUL2	Ca21chr4_C_albicans_SC5314	541600	Protein described as a sulfate transporter; transcription is negatively regulated by Sfu1p; induced upon biofilm formation; amphotericin B induced	SUL1	-1.00867	0.0489529	29.1397	0.0218386	0.804029	-0.974053	-1.04328
6672	CUST_8244_PI362308700	orf19.2346	0	Ca21chr1_C_albicans_SC5314	2381550	Putative protein of unknown function, transcription is positively regulated by Tbf1p; predicted ORF in Assemblies 19, 20 and 21	FMP40	0.12224	0.0106398	16.2477	0.0391327	0.804978	0.129763	0.114716
6686	CUST_4387_PI362308700	orf19.6757	GCY1	Ca21chr3_C_albicans_SC5314	1689012	Predicted ORF in Assemblies 19, 20 and 21; mutation confers hypersensitivity to toxic ergosterol analog; farnesol-downregulated; protein detected by mass spec in stationary phase cultures	GCY1	-1.26942	0.080139	22.4014	0.0283999	0.796757	-1.32608	-1.21275
6693	CUST_4008_PI362308700	orf19.473	TPO4	Ca21chrR_C_albicans_SC5314	890929	Putative sperimidine transporter; fungal-specific (no human or murine homolog)	TPO4	1.2613	0.0720866	24.7446	0.0257137	0.79408	1.31228	1.21033
6694	CUST_11189_PI362308700	orf19.3533	0	Ca21chr2_C_albicans_SC5314	1043020	Predicted ORF in Assemblies 19, 20 and 21	EMI1	-0.226298	0.0120098	26.6477	0.023879	0.797701	-0.23479	-0.217806
6762	CUST_2740_PI362308700	orf19.6202	RBT4	Ca21chr1_C_albicans_SC5314	1499055	Protein with similarity to plant pathogenesis-related proteins; required for virulence in mouse systemic and rabbit corneal infections; not required for filamentation; mRNA binds to She3p and is localized to hyphal tips	PRY3	0.788481	0.0493917	22.5763	0.0281802	0.796058	0.753556	0.823406
6814	CUST_7074_PI362308700	orf19.5322	0	Ca21chr2_C_albicans_SC5314	2166211	Predicted ORF in Assemblies 19, 20 and 21	ATG27	0.512816	0.0568275	12.762	0.0497824	0.790586	0.472633	0.552999
6815	CUST_8231_PI362308700	orf19.4524	ZCF24	Ca21chr1_C_albicans_SC5314	416295	Predicted zinc-finger protein of unknown function; caspofungin induced	ASG1	-0.369824	0.0401858	13.0148	0.0488191	0.789608	-0.398239	-0.341408
6827	CUST_8252_PI362308700	orf19.2341	HNT1	Ca21chr1_C_albicans_SC5314	2389729	Predicted ORF in Assemblies 19, 20 and 21; protein level decreased in stationary phase cultures	HNT1	-1.20461	0.0759258	22.4373	0.0283545	0.797308	-1.25829	-1.15092
6844	CUST_7182_PI362308700	orf19.3477	0	Ca21chr6_C_albicans_SC5314	492911	Predicted ORF in Assemblies 19, 20 and 21	PUS1	1.19727	0.0478463	35.3883	0.0179848	0.80472	1.2311	1.16344
6852	CUST_11626_PI362308700	orf19.5438	0	Ca21chr3_C_albicans_SC5314	43340	Predicted ORF in Assemblies 19, 20 and 21	SLX8	0.443187	0.0419962	14.9242	0.0425931	0.790003	0.472882	0.413491
6882	CUST_9870_PI362308700	orf19.2769	0	Ca21chr4_C_albicans_SC5314	463682	Predicted ORF in Assemblies 19, 20 and 21; hyphal-induced expression; greater mRNA abundance observed in a cyr1 or ras1 homozygous null mutant than in wild type	PBI2	-1.29214	0.0652387	28.0104	0.0227184	0.802672	-1.24601	-1.33827
6896	CUST_2043_PI362308700	orf19.7036	0	Ca21chr7_C_albicans_SC5314	154466	Predicted ORF in Assemblies 19, 20 and 21	WHI2	-0.237738	0.00117918	285.123	0.00223278	0.855436	-0.236904	-0.238572
6900	CUST_1020_PI362308700	orf19.6570	NUP	Ca21chr7_C_albicans_SC5314	337899	Nucleoside permease; adenosine and guanosine are substrates, whereas cytidine, adenine, guanine, uridine, uracil are not; similar to a nucleoside permease of S. pombe; possibly processed by Kex2p	0	-0.893391	0.0654124	19.3151	0.0329303	0.79162	-0.939644	-0.847137
6907	CUST_6894_PI362308700	orf19.4223	GCD11	Ca21chr5_C_albicans_SC5314	483987	Protein similar to S. cerevisiae Gcd11p, which is a subunit of translation initiation factor eIF2; likely to be essential for growth, based on an insertional mutagenesis strategy	GCD11	0.312365	0.0301212	14.6658	0.0433415	0.788377	0.291066	0.333664
6920	CUST_6615_PI362308700	orf19.310	0	Ca21chr3_C_albicans_SC5314	667274	Predicted ORF in Assemblies 19, 20 and 21; possibly an essential gene, disruptants not obtained by UAU1 method	ECM18	-0.213226	0.0158632	19.0091	0.0334593	0.790388	-0.202009	-0.224443
6940	CUST_2455_PI362308700	orf19.6986	0	Ca21chr3_C_albicans_SC5314	1234026	Predicted ORF in Assemblies 19, 20 and 21	MDR1	-0.384314	0.0368119	14.7643	0.0430531	0.794926	-0.410343	-0.358284
6950	CUST_7166_PI362308700	orf19.5658	MNN10	Ca21chr4_C_albicans_SC5314	49314	Protein with similarity to mannosyltransferases; fungal-specific (no human or murine homolog)	MNN10	0.302224	0.0272151	15.7048	0.0404819	0.799207	0.321468	0.28298
6959	CUST_9896_PI362308700	orf19.4937	CHS3	Ca21chr1_C_albicans_SC5314	2859992	Major chitin synthase of yeast-form and hyphal cells; synthesizes short-chitin fibrils; Chs4p-activated; transcription induced at yeast-hyphal transition; Chs1p and Chs2p, but not Chs3p, are inhibited by the protoberberine HWY-289	CHS3	0.738456	0.00696982	149.836	0.0042487	0.777449	0.743384	0.733527
6960	CUST_1192_PI362308700	orf19.1902	NOC4	Ca21chr2_C_albicans_SC5314	1498605	Predicted ORF in Assemblies 19, 20 and 21; mutation confers resistance to 5-fluorocytosine (5-FC), 5-fluorouracil (5-FU), and tubercidin (7-deazaadenosine)	NOC4	0.587577	0.0456985	18.1835	0.0349756	0.792608	0.555263	0.619891
6994	CUST_11368_PI362308700	orf19.3648	0	Ca21chr6_C_albicans_SC5314	137049	Predicted ORF in Assemblies 19, 20 and 21	MMS4	0.445564	0.00372087	169.348	0.00375919	0.822995	0.442933	0.448195
6999	CUST_8646_PI362308700	orf19.1136	0	Ca21chr1_C_albicans_SC5314	2585384	Predicted ORF in Assemblies 19, 20 and 21	APS2	-0.658098	0.0215696	43.1483	0.0147516	0.803797	-0.642846	-0.67335
7002	CUST_11984_PI362308700	orf19.7436.1	ECM15	Ca21chr3_C_albicans_SC5314	1479788	ORF Predicted by Annotation Working Group; caspofungin repressed	ECM15	-1.09774	0.0548299	28.3138	0.0224751	0.801003	-1.05897	-1.13651
7011	CUST_1253_PI362308700	orf19.3812	SSZ1	Ca21chr4_C_albicans_SC5314	1007666	Protein described as an HSP70 chaperone; protein level decreased in stationary phase cultures	SSZ1	-0.343384	0.0339353	14.3101	0.0444152	0.794935	-0.319388	-0.36738
7046	CUST_2918_PI362308700	orf19.7297	0	Ca21chrR_C_albicans_SC5314	1926092	Predicted ORF in Assemblies 19, 20 and 21; Hog1p-induced; Gcn4p-regulated; protein level decreased in stationary phase cultures	YHR112C	-2.49198	0.146532	24.0507	0.0264547	0.802807	-2.38837	-2.5956
7048	CUST_11740_PI362308700	orf19.3843	0	Ca21chr4_C_albicans_SC5314	950420	Predicted ORF in Assemblies 19, 20 and 21	SEC66	0.0621281	0.00018018	487.635	0.00130552	0.800285	0.0622555	0.0620007
7068	CUST_6163_PI362308700	orf19.4099	ECM17	Ca21chr2_C_albicans_SC5314	1260036	Predicted enzyme of sulfur amino acid biosynthesis; putative role in regulation of cell wall biogenesis; upregulated in biofilm; possibly adherence-induced; regulated by Tsa1p, Tsa1Bp under H2O2 stress; Gcn4p-regulated; Tbf1p-activated	MET5	-1.43277	0.132842	15.253	0.0416777	0.794663	-1.33884	-1.52671
7087	CUST_1717_PI362308700	orf19.287	0	Ca21chr3_C_albicans_SC5314	627208	Predicted ORF in Assemblies 19, 20 and 21; repressed by nitric oxide; identified in detergent-resistant membrane fraction (possible lipid raft component)	0	0.61913	0.00231003	379.036	0.00167957	0.823663	0.617497	0.620764
7101	CUST_9740_PI362308700	orf19.999	GCA2	Ca21chr1_C_albicans_SC5314	2335782	Predicted extracellular glucoamylase, promotes biofilm matrix formation; possibly an essential gene, disruptants not obtained by UAU1 method	ROT2	-0.726775	0.0152645	67.3339	0.00945397	0.752634	-0.715982	-0.737569
7104	CUST_8938_PI362308700	orf19.5420	0	Ca21chr3_C_albicans_SC5314	65094	Predicted ORF in Assemblies 19, 20 and 21	RML2	0.467026	0.00787158	83.9062	0.00758692	0.768724	0.472592	0.46146
7115	CUST_7028_PI362308700	orf19.3153	MSS4	Ca21chr3_C_albicans_SC5314	236577	Phosphatidylinositol-4-phosphate 5-kinase; activity induced by phosphatidic acid (Pld1p product); macrophage/pseudohyphal-repressed; mRNA binds to She3p and is localized to buds of yeast-form cells and hyphal tips	MSS4	0.911784	0.00438024	294.381	0.00216257	0.883769	0.908686	0.914881
7136	CUST_4628_PI362308700	orf19.6349	RVS162	Ca21chr1_C_albicans_SC5314	2774814	Protein containing a BAR domain, which is found in proteins involved in membrane curvature; null mutant does not display the endocytic, hyphal growth, virulence, or cell wall defects exhibited by mutants in related genes RVS161 and RVS167	RVS161	-0.505142	0.0153668	46.4884	0.0136921	0.773569	-0.494276	-0.516008
7168	CUST_4079_PI362308700	orf19.459	ADP1	Ca21chrR_C_albicans_SC5314	1248992	Putative PDR-subfamily ABC transporter; similar to WHITE subfamily proteins; gene used for strain identification by multilocus sequence typing	ADP1	-0.622057	0.0614021	14.3272	0.0443623	0.796313	-0.57864	-0.665475
7199	CUST_4880_PI362308700	orf19.651	LYP1	Ca21chrR_C_albicans_SC5314	1084370	Predicted ORF in Assemblies 19, 20 and 21; amphotericin B induced; flucytosine repressed; possibly an essential gene, disruptants not obtained by UAU1 method	LYP1	1.28555	0.0174736	104.045	0.00611849	0.781382	1.29791	1.2732
7205	CUST_9923_PI362308700	orf19.2751	0	Ca21chr4_C_albicans_SC5314	512530	Predicted membrane transporter, member of the monocarboxylate porter (MCP) family, major facilitator superfamily (MFS); alkaline upregulated by Rim101p; possibly an essential gene, disruptants not obtained by UAU1 method	MCH4	-0.290101	0.00144656	283.613	0.00224467	0.833928	-0.291124	-0.289078
7225	CUST_11366_PI362308700	orf19.3649	0	Ca21chr6_C_albicans_SC5314	134314	Predicted ORF in Assemblies 19, 20 and 21	FES1	-0.67218	0.0405532	23.441	0.027142	0.794177	-0.643505	-0.700856
7226	CUST_7393_PI362308700	orf19.5938	SEN1	Ca21chr3_C_albicans_SC5314	1014996	Predicted ORF in Assemblies 19, 20 and 21; decreased expression in response to prostaglandins	SEN1	0.446583	0.0317646	19.8826	0.031992	0.793971	0.424122	0.469044
7240	CUST_9486_PI362308700	orf19.4681	RAT1	Ca21chr4_C_albicans_SC5314	219462	5'-->3' exoribonuclease; similar to S. cerevisiae nuclear exoribonuclease Rat1p; suppresses S. cerevisiae kem1 mutant slow growth, mating defect, and haploid invasive growth defect	RAT1	-0.262069	0.00774166	47.8737	0.013296	0.772552	-0.267544	-0.256595
7247	CUST_4841_PI362308700	orf19.665	NEP1	Ca21chr1_C_albicans_SC5314	2495756	Protein of unknown function; ortholog of S. cerevisiae Emg1p, which is involved in ribosome biogenesis	EMG1	0.834679	0.0364644	32.3717	0.0196597	0.814282	0.808895	0.860463
7267	CUST_10368_PI362308700	orf19.822	0	Ca21chr2_C_albicans_SC5314	838760	Protein detected in some, not all, biofilm extracts; fluconazole-downregulated; greater mRNA abundance observed in cyr1 or ras1 homozygous null mutant than in wild type; protein detected by mass spec in stationary phase cultures	0	-0.987089	0.0749298	18.6302	0.0341387	0.78673	-0.934106	-1.04007
7277	CUST_2607_PI362308700	orf19.2770.1	SOD1	Ca21chr4_C_albicans_SC5314	461741	Cytosolic copper- and zinc-containing superoxide dismutase, involved in protection from oxidative stress and required for full virulence; alkaline upregulated by Rim101p; upregulated in the presence of human blood	SOD1	-1.37593	0.0856031	22.7312	0.0279884	0.794301	-1.43646	-1.3154
7289	CUST_6603_PI362308700	orf19.7419	HNT2	Ca21chr3_C_albicans_SC5314	1453314	Predicted ORF in Assemblies 19, 20 and 21; induced upon low-level peroxide stress	HNT2	-0.654327	0.0224163	41.2807	0.0154187	0.800989	-0.670178	-0.638477
7298	CUST_6342_PI362308700	orf19.4040	ILV3	Ca21chr5_C_albicans_SC5314	1171286	Putative dihydroxyacid dehydratase; fungal-specific (no human or murine homolog); upregulated in biofilm; S. cerevisiae ortholog is Gcn4p regulated; repressed by nitric oxide; macrophage-induced protein; farnesol-downregulated	ILV3	-1.3954	0.125645	15.7062	0.0404785	0.80043	-1.30656	-1.48425
7324	CUST_5471_PI362308700	orf19.1872	0	Ca21chr2_C_albicans_SC5314	1538720	Predicted ORF in Assemblies 19, 20 and 21; repressed by nitric oxide	0	0.236701	0.00355009	94.2919	0.00675133	0.780861	0.239211	0.23419
7407	CUST_1005_PI362308700	orf19.6578	0	Ca21chr7_C_albicans_SC5314	317086	Predicted membrane transporter, member of the vesicular neurotransmitter (VNT) family, major facilitator superfamily (MFS); downregulated in core caspofungin response	0	1.7103	0.156298	15.4751	0.0410812	0.799453	1.82081	1.59978
7413	CUST_5201_PI362308700	orf19.3604	0	Ca21chr2_C_albicans_SC5314	1772272	Predicted ORF in Assemblies 19, 20 and 21	IES2	-0.526043	0.0235192	31.631	0.0201197	0.798279	-0.542674	-0.509413
7423	CUST_7348_PI362308700	orf19.5947	SEC7	Ca21chr3_C_albicans_SC5314	1030395	Predicted ORF in Assemblies 19, 20 and 21; mutation confers hypersensitivity to Brefeldin A; caspofungin repressed	SEC7	-0.108132	0.00393907	38.8218	0.0163949	0.794472	-0.105347	-0.110917
7425	CUST_10864_PI362308700	orf19.2602	OPT1	Ca21chrR_C_albicans_SC5314	443243	Oligopeptide transporter; transports 3-to-5-residue peptides; alleles are distinct, one has intron; not ABC or PTR type transporter; suppresses S. cerevisiae ptr2-2 mutant defects; induced by BSA or peptides; Stp3p, Hog1p regulated	OPT1	-0.928035	0.0821284	15.9803	0.0397858	0.797017	-0.869961	-0.986109
7477	CUST_4936_PI362308700	orf19.5175	0	Ca21chr7_C_albicans_SC5314	621061	Predicted ORF in Assemblies 19, 20 and 21	SSM4	0.629008	0.0664135	13.3941	0.0474417	0.788123	0.582047	0.67597
7498	CUST_6115_PI362308700	orf19.2525	LYS12	Ca21chrR_C_albicans_SC5314	332030	Protein described as mitochondrial homoisocitrate dehydrogenase; clade-associated gene expression; protein level decreased in stationary phase cultures	LYS12	-4.32735	0.447331	13.6807	0.0464516	0.788777	-4.01104	-4.64366
7514	CUST_2311_PI362308700	orf19.589	VPS21	Ca21chrR_C_albicans_SC5314	1759084	Late endosomal Rab small monomeric GTPase involved in transport of endocytosed proteins to the vacuole; involved in filamentous growth and virulence	VPS21	-0.750329	0.0374025	28.3704	0.0224303	0.804079	-0.723881	-0.776776
7518	CUST_8919_PI362308700	orf19.7600	FDH3	Ca21chrR_C_albicans_SC5314	2187850	Putative protein of glycine catabolism; downregulated by Efg1p under yeast-form but not hyphal growth conditions; transcriptionally activated by Mnl1p under weak acid stress	SFA1	-1.54176	0.0386687	56.386	0.0112892	0.818968	-1.51441	-1.5691
7528	CUST_3476_PI362308700	orf19.263.1	0	Ca21chr3_C_albicans_SC5314	588473	Predicted ORF in Assembly 20 and 21; gene has intron	0	0.577563	0.0261601	31.2231	0.0203824	0.798366	0.559065	0.596061
7533	CUST_4379_PI362308700	orf19.4580	0	Ca21chr4_C_albicans_SC5314	419541	Predicted ORF in Assemblies 19, 20 and 21	0	-0.915368	0.00970322	133.412	0.00477174	0.769758	-0.922229	-0.908506
7567	CUST_5826_PI362308700	orf19.797	BAT21	Ca21chr2_C_albicans_SC5314	887895	Protein described as a branched chain amino acid aminotransferase; regulated by Gcn4p, Gcn2p; induced in response to amino acid starvation (3-aminotriazole treatment)	BAT2	-1.72362	0.063742	38.2412	0.0166437	0.793976	-1.76869	-1.67855
7597	CUST_7832_PI362308700	orf19.2178	0	Ca21chr2_C_albicans_SC5314	1639848	Predicted ORF in Assemblies 19, 20 and 21	MRS3|MRS4	0.271467	0.00758243	50.6318	0.0125719	0.782393	0.266105	0.276828
7604	CUST_8703_PI362308700	orf19.4436	0	Ca21chr1_C_albicans_SC5314	1584935	Predicted ORF in Assemblies 19, 20 and 21	GPX2	-0.293428	0.032214	12.8817	0.0493217	0.789405	-0.270649	-0.316207
7633	CUST_1844_PI362308700	orf19.5184	0	Ca21chr7_C_albicans_SC5314	596459	Predicted ORF in Assemblies 19, 20 and 21	SRM1	-0.434864	0.0394292	15.5973	0.0407602	0.800833	-0.462744	-0.406983
7650	CUST_7430_PI362308700	orf19.1575	PRS1	Ca21chr2_C_albicans_SC5314	503401	Phosphoribosylpyrophosphate synthetase; enzyme of purine, pyrimidine, histidine, and tryptophan biosynthesis; essential; flucytosine induced; macrophage/pseudohyphal-induced	PRS3	0.851384	0.0562472	21.4062	0.0297184	0.785231	0.811611	0.891157
7686	CUST_7982_PI362308700	orf19.4828	0	Ca21chr1_C_albicans_SC5314	2124372	Predicted ORF in Assemblies 19, 20 and 21	0	-0.832379	0.0912805	12.8961	0.0492667	0.790589	-0.767834	-0.896925
7697	CUST_9157_PI362308700	orf19.345	0	Ca21chr3_C_albicans_SC5314	737585	Predicted ORF in Assemblies 19, 20 and 21	UGA2	-0.729346	0.0728127	14.1658	0.0448661	0.793736	-0.780832	-0.67786
7743	CUST_2968_PI362308700	orf19.183	HIS3	Ca21chr2_C_albicans_SC5314	1007761	Imidazoleglycerol-phosphate dehydratase, enzyme of histidine biosynthesis; functionally complements S. cerevisiae his3-1 mutation; hyphal-induced expression; regulated by Gcn2p and Gcn4p; fungal-specific (no human or murine homolog)	HIS3	-0.17921	0.00998092	25.3926	0.0250581	0.789749	-0.172153	-0.186268
7754	CUST_1307_PI362308700	orf19.1619	0	Ca21chr3_C_albicans_SC5314	490944	Predicted ORF in Assemblies 19, 20 and 21; possibly an essential gene, disruptants not obtained by UAU1 method	CTK1	-0.592539	0.00675087	124.129	0.0051286	0.757549	-0.597313	-0.587765
7761	CUST_585_PI362308700	orf19.3799	0	Ca21chr4_C_albicans_SC5314	1033344	Predicted ORF in Assemblies 19, 20 and 21	RTN1	0.503344	0.0204584	34.7943	0.0182916	0.803783	0.51781	0.488878
7787	CUST_7616_PI362308700	orf19.2124	0	Ca21chr6_C_albicans_SC5314	985627	Predicted ORF in Assemblies 19, 20 and 21	YNL134C	-0.652713	0.0675354	13.668	0.0464945	0.788413	-0.604958	-0.700468
7788	CUST_5287_PI362308700	orf19.6285	GLC7	Ca21chrR_C_albicans_SC5314	1660910	Protein described as serine/threonine phosphatase; transcriptionally regulated by iron; expression greater in high iron; intron in 5'-UTR; possibly an essential gene, disruptants not obtained by UAU1 method	GLC7	0.921058	0.0390818	33.3294	0.0190951	0.821424	0.948693	0.893423
7793	CUST_6414_PI362308700	orf19.7547	0	Ca21chrR_C_albicans_SC5314	2072857	Predicted ORF in Assemblies 19, 20 and 21	PIB1	-0.591931	0.0564022	14.8419	0.0428287	0.791975	-0.631813	-0.552048
7794	CUST_121_PI362308700	orf19.5137.1	HHO1	Ca21chr7_C_albicans_SC5314	692061	Protein described at histone H1; farnesol regulated	HHO1	0.281163	0.0269521	14.753	0.043086	0.793145	0.262105	0.300221
7807	CUST_7468_PI362308700	orf19.1569	UTP22	Ca21chr2_C_albicans_SC5314	491423	Predicted ORF in Assemblies 19, 20 and 21; decreased expression observed in an ssr1 homozygous null mutant; decreased expression in response to prostaglandins; heterozygous null mutant exhibits resistance to parnafungin	UTP22	1.38671	0.142763	13.7368	0.0462626	0.794369	1.28576	1.48766
7837	CUST_9814_PI362308700	orf19.969	0	Ca21chr5_C_albicans_SC5314	43421	Predicted ORF in Assemblies 19, 20 and 21	PRS1	0.014102	0.000766449	26.0202	0.0244543	0.784842	0.01356	0.0146439
7852	CUST_3715_PI362308700	orf19.6470	AHP2	Ca21chr7_C_albicans_SC5314	520556	Predicted ORF in Assemblies 19, 20 and 21; macrophage-downregulated gene	AHP1	-0.329471	0.0361967	12.8725	0.0493567	0.788935	-0.355065	-0.303876
7858	CUST_5479_PI362308700	orf19.1868	RNR22	Ca21chr2_C_albicans_SC5314	1546130	Protein described as ribonucleoside diphosphate reductase; shows colony morphology-related gene regulation by Ssn6p; RNA abundance regulated by tyrosol and cell density	RNR2	-1.74714	0.176475	14.0011	0.0453923	0.790497	-1.87193	-1.62235
7871	CUST_8566_PI362308700	orf19.1152	0	Ca21chr1_C_albicans_SC5314	2558395	Predicted ORF in Assemblies 19, 20 and 21; regulated by Gcn2p and Gcn4p; induced in core stress response	0	-0.891528	0.034899	36.1274	0.017617	0.799944	-0.86685	-0.916205
7879	CUST_7399_PI362308700	orf19.5933	0	Ca21chr3_C_albicans_SC5314	1001626	Predicted ORF in Assemblies 19, 20 and 21; increased transcription is observed upon benomyl treatment; possibly spurious ORF (Annotation Working Group prediction)	0	0.159612	0.0151076	14.9412	0.042545	0.790306	0.170294	0.148929
7890	CUST_1040_PI362308700	orf19.6568	SMC6	Ca21chr7_C_albicans_SC5314	340592	Predicted ORF in Assemblies 19, 20 and 21; cell-cycle regulated periodic mRNA expression; S. cerevisiae ortholog is not cell-cycle regulated	SMC6	-0.328508	0.0275678	16.8523	0.0377322	0.798958	-0.309015	-0.348002
7891	CUST_3867_PI362308700	orf19.4265	UAP1	Ca21chr5_C_albicans_SC5314	565078	UDP-N-acetylglucosamine pyrophosphorylase, catalyzes biosynthesis of UDP-N-acetylglucosamine from UTP and N-acetylglucosamine 1-phosphate; functional homolog of S. cerevisiae Qri1p; alkaline upregulated	QRI1	0.253553	0.00550709	65.1122	0.0097765	0.749124	0.257447	0.249659
7903	CUST_5631_PI362308700	orf19.4623	0	Ca21chr4_C_albicans_SC5314	340995	Predicted ORF in Assemblies 19, 20 and 21; possibly spurious ORF (Annotation Working Group prediction)	0	0.247382	0.00226963	154.144	0.00412996	0.778975	0.245777	0.248987
7908	CUST_9247_PI362308700	orf19.5258	0	Ca21chr1_C_albicans_SC5314	2641174	Predicted ORF in Assemblies 19, 20 and 21; induced by nitric oxide	0	-0.216666	0.0112508	27.2347	0.0233648	0.80691	-0.224622	-0.208711
7978	CUST_3873_PI362308700	orf19.2089	0	Ca21chr2_C_albicans_SC5314	63257	Predicted ORF in Assemblies 19, 20 and 21	NYV1	0.21286	0.0126948	23.7128	0.0268312	0.798425	0.203883	0.221836
7981	CUST_994_PI362308700	orf19.6584	PRT1	Ca21chr7_C_albicans_SC5314	305372	Putative translation initiation factor; mutation confers hypersensitivity to roridin A and verrucarin A; genes encoding ribosomal subunits, translation factors, and tRNA synthetases are downregulated upon phagocytosis by murine macrophage	PRT1	0.323215	0.00164651	277.614	0.00229317	0.780952	0.324379	0.32205
7984	CUST_11449_PI362308700	orf19.532	RBR2	Ca21chrR_C_albicans_SC5314	979776	Cell wall protein; expression is repressed by Rim101p; expression is regulated upon white-opaque switching; transcription is repressed in response to alpha pheromone in SpiderM medium; macrophage-induced gene	TIP1	0.664598	0.019234	48.8657	0.0130261	0.782844	0.678199	0.650998
8025	CUST_4829_PI362308700	orf19.5595	SHE3	Ca21chr6_C_albicans_SC5314	652332	mRNA-binding protein that localizes specific mRNAs to daughter yeast-form cells and to hyphal tips; required for normal filamentous growth and host epithelial cell damage; ortholog of S. cerevisiae She3p but set of target mRNAs differs	0	1.1804	0.0321683	51.8939	0.0122662	0.804191	1.20315	1.15765
8031	CUST_7589_PI362308700	orf19.2132	0	Ca21chr6_C_albicans_SC5314	996225	Predicted ORF in Assemblies 19, 20 and 21; possibly spurious ORF (Annotation Working Group prediction)	0	-0.745311	0.065248	16.1542	0.0393587	0.80692	-0.791448	-0.699173
8055	CUST_8581_PI362308700	orf19.5505	HIS7	Ca21chr7_C_albicans_SC5314	829907	Putative imidazole glycerol phosphate synthase; histidine biosynthesis; no human/murine homolog; transcription induced by histidine starvation; regulated by Gcn2p and Gcn4p; detected by mass spec in exponential/stationary phase culture	HIS7	-0.79928	0.0743493	15.2033	0.0418136	0.791104	-0.851853	-0.746707
8062	CUST_6552_PI362308700	orf19.321	0	Ca21chr3_C_albicans_SC5314	683149	Predicted ORF in Assemblies 19, 20 and 21	MUP3	-0.834027	0.0392677	30.0373	0.0211865	0.801687	-0.861794	-0.806261
8072	CUST_11471_PI362308700	orf19.3278	GSY1	Ca21chrR_C_albicans_SC5314	184247	Protein described as glycogen synthase; enzyme of glycogen metabolism; transcription downregulated upon yeast-hyphal switch and regulated by Efg1p; strong oxidative stress induced; shows colony morphology-related gene regulation by Ssn6p	GSY1	-0.502661	0.031231	22.7617	0.0279509	0.795076	-0.524745	-0.480578
8081	CUST_6120_PI362308700	orf19.2521	0	Ca21chrR_C_albicans_SC5314	327534	Predicted ORF in Assemblies 19, 20 and 21	0	0.548719	0.00803833	96.5382	0.00659425	0.792603	0.543035	0.554403
8095	CUST_9100_PI362308700	orf19.353	ULP1	Ca21chr3_C_albicans_SC5314	755570	Putative SUMO deconjugation enzyme that cleaves the small ubiquitin-like modifier (SUMO) off proteins	ULP1	-0.249474	0.00227498	155.083	0.00410498	0.786361	-0.247866	-0.251083
8099	CUST_9151_PI362308700	orf19.347	RSN1	Ca21chr3_C_albicans_SC5314	743350	Protein induced during the mating process	0	-1.10485	0.0808033	19.337	0.032893	0.792275	-1.04772	-1.16199
8109	CUST_10339_PI362308700	orf19.1397	0	Ca21chr2_C_albicans_SC5314	1958644	Predicted ORF in Assemblies 19, 20 and 21	CYB5	-0.126081	0.00774825	23.0123	0.0276469	0.793795	-0.13156	-0.120602
8124	CUST_3588_PI362308700	orf19.6948	CCC1	Ca21chr3_C_albicans_SC5314	782739	Putative manganese transporter, required for normal filamentous growth; mRNA binds to She3p and is localized to hyphal tips; repressed by nitric oxide and alkaline pH; shows colony morphology-related regulation by Ssn6p	CCC1	1.33856	0.0908794	20.8299	0.0305394	0.79157	1.2743	1.40282
8125	CUST_3465_PI362308700	orf19.3672	GAL10	Ca21chr1_C_albicans_SC5314	452186	UDP-glucose 4-epimerase, required for galactose utilization; mutant shows cell wall defects and increased filamentation; fluconazole-induced; protein detected by mass spec in stationary phase cultures	GAL10	1.98224	0.0909546	30.821	0.0206482	0.798569	2.04655	1.91792
8127	CUST_10457_PI362308700	orf19.1557	0	Ca21chr2_C_albicans_SC5314	469414	Predicted ORF in Assemblies 19, 20 and 21	YLR137W	0.594042	0.0343334	24.469	0.026003	0.795003	0.61832	0.569765
8132	CUST_30_PI362308700	orf19.6079	0	Ca21chr1_C_albicans_SC5314	42606	Predicted ORF in retrotransposon Tca8 with similarity to the Gag region encoding nucleocapsid-like protein; transcription is downregulated in response to ciclopirox olamine; filament induced; regulated by Rfg1p, Tup1p; overlaps orf19.6078.1	0	3.63599	0.320661	16.0359	0.0396484	0.800806	3.86274	3.40925
8143	CUST_8844_PI362308700	orf19.2216	PDS5	Ca21chr2_C_albicans_SC5314	1562086	Predicted ORF in Assemblies 19, 20 and 21; cell-cycle regulated periodic mRNA expression	PDS5	-0.163516	0.00745827	31.0053	0.0205255	0.798864	-0.158242	-0.16879
8146	CUST_3410_PI362308700	orf19.3681	0	Ca21chr1_C_albicans_SC5314	469144	Predicted ORF in Assemblies 19, 20 and 21	KAP95	1.3474	0.0812242	23.4599	0.0271201	0.795436	1.28997	1.40484
8147	CUST_8311_PI362308700	orf19.3974	PUT2	Ca21chr5_C_albicans_SC5314	1063882	Putative delta-1-pyrroline-5-carboxylate dehydrogenase; alkaline upregulated; protein detected by mass spec in exponential and stationary phase cultures	PUT2	1.16614	0.0415715	39.6708	0.0160442	0.7996	1.19554	1.13674
8155	CUST_1136_PI362308700	orf19.1910	0	Ca21chr2_C_albicans_SC5314	14823	Predicted ORF in Assemblies 19, 20 and 21	0	0.0382374	0.000501258	107.88	0.005901	0.777917	0.0385918	0.0378829
8160	CUST_11887_PI362308700	orf19.1830	0	Ca21chr1_C_albicans_SC5314	2344641	Predicted ORF in Assemblies 19, 20 and 21	0	0.974741	0.105677	13.0444	0.0487087	0.788863	1.04947	0.900016
8210	CUST_7858_PI362308700	orf19.6524	0	Ca21chr7_C_albicans_SC5314	423405	Predicted ORF in Assemblies 19, 20 and 21	TOM40	0.471909	0.0204954	32.5624	0.0195446	0.817806	0.457417	0.486401
8212	CUST_11781_PI362308700	orf19.1654	0	Ca21chr3_C_albicans_SC5314	428218	Predicted ORF in Assemblies 19, 20 and 21; increased expression in response to prostaglandins	0	-0.482297	0.0462161	14.7583	0.0430706	0.794053	-0.514976	-0.449617
8219	CUST_7035_PI362308700	orf19.409	0	Ca21chr1_C_albicans_SC5314	1886244	Predicted membrane protein; similar to S. cerevisiae Ynr018Wp	AIM38	-0.715801	0.0565946	17.8868	0.0355546	0.793989	-0.755819	-0.675782
8250	CUST_11933_PI362308700	orf19.1814	0	Ca21chrR_C_albicans_SC5314	1540104	Predicted ORF in Assemblies 19, 20 and 21; possibly an essential gene, disruptants not obtained by UAU1 method	STT4	-0.42017	0.0319944	18.5723	0.0342448	0.787694	-0.442794	-0.397547
8253	CUST_5187_PI362308700	orf19.1433	0	Ca21chr2_C_albicans_SC5314	1695466	Predicted ORF in Assemblies 19, 20 and 21; shows colony morphology-related gene regulation by Ssn6p	LPX1	-1.33964	0.005544	341.727	0.00186294	0.878449	-1.33572	-1.34356
8261	CUST_2539_PI362308700	orf19.1235	HOM3	Ca21chr4_C_albicans_SC5314	1210282	Putative L-aspartate 4-P-transferase; fungal-specific (no human or murine homolog); regulated by Gcn2p and Gcn4p	HOM3	-0.427224	0.0323159	18.6962	0.0340183	0.786914	-0.404373	-0.450074
8296	CUST_9862_PI362308700	orf19.4947	0	Ca21chr1_C_albicans_SC5314	2880732	Predicted ORF in Assemblies 19, 20 and 21	YPR098C	0.69265	0.0191317	51.2006	0.0124323	0.793852	0.706178	0.679122
8309	CUST_6009_PI362308700	orf19.2551	MET6	Ca21chrR_C_albicans_SC5314	371056	Essential 5-methyltetrahydropteroyltriglutamate-homocysteine methyltransferase (cobalamin-independent methionine synthase); antigenic during murine or human systemic infection; heat shock, estrogen, possibly biofilm, and GCN-induced	MET6	-0.298097	0.0299944	14.0551	0.0452185	0.794239	-0.276888	-0.319306
8313	CUST_1008_PI362308700	orf19.6577	FLU1	Ca21chr7_C_albicans_SC5314	320557	Multidrug efflux pump of the plasma membrane; MDR family member of the MFS (major facilitator superfamily) of transporters; preferred substrate may be mycophenolic acid; fungal-specific (no human or murine homolog)	TPO1	1.11653	0.0235842	66.9521	0.00950788	0.747221	1.09985	1.13321
8320	CUST_8560_PI362308700	orf19.1155	DPP2	Ca21chr1_C_albicans_SC5314	2553583	Predicted ORF in Assemblies 19, 20 and 21; similar to S. cerevisiae pyrophosphate phosphatase Lpp1p; possible role in farnesol biosynthesis	DPP1	0.381982	0.0243464	22.1883	0.0286723	0.797103	0.364766	0.399197
8332	CUST_7859_PI362308700	orf19.6522	0	Ca21chr7_C_albicans_SC5314	431677	Putative allantoate permease; fungal-specific (no human or murine homolog); Gcn4p-regulated	YIL166C	0.659345	0.0571435	16.3178	0.0389652	0.804231	0.618938	0.699751
8337	CUST_4805_PI362308700	orf19.679	FGR39	Ca21chr1_C_albicans_SC5314	2469859	Protein lacking an ortholog in S. cerevisiae; transposon mutation affects filamentous growth; possibly spurious ORF (Annotation Working Group prediction)	0	0.400605	0.0336638	16.8294	0.0377834	0.797289	0.376801	0.424409
8346	CUST_11490_PI362308700	orf19.1097	ALS2	Ca21chr6_C_albicans_SC5314	971454	ALS family protein; role in adhesion, biofilm formation, germ tube induction; expressed at infection of human buccal epithelial cells; putative GPI-anchor; induced by ketoconazole, low iron and at cell wall regeneration; regulated by Sfu1p	SAG1	2.38931	0.0371882	90.8622	0.00700615	0.788031	2.36302	2.41561
8348	CUST_2353_PI362308700	orf19.4952.1	0	Ca21chr1_C_albicans_SC5314	2893446	ORF Predicted by Annotation Working Group	FPR2	-0.870404	0.0526254	23.3905	0.0272004	0.79023	-0.907616	-0.833192
8380	CUST_10961_PI362308700	orf19.372	0	Ca21chr4_C_albicans_SC5314	8369	Predicted ORF in Assemblies 19, 20 and 21; overlaps orf19.374	YER163C	-0.387683	0.0318634	17.2068	0.0369566	0.801926	-0.410214	-0.365152
8387	CUST_3104_PI362308700	orf19.5085	0	Ca21chr1_C_albicans_SC5314	1769083	Predicted ORF in Assemblies 19, 20 and 21	PSE1	0.502452	0.0548885	12.9458	0.0490783	0.790671	0.46364	0.541265
8423	CUST_12048_PI362308700	orf19.5132	0	Ca21chr7_C_albicans_SC5314	700977	Predicted ORF in Assemblies 19, 20 and 21; transcription detected in high-resolution tiling array experiments	0	1.28597	0.136545	13.3189	0.0477086	0.788285	1.38252	1.18942
8427	CUST_6425_PI362308700	orf19.7544	TLO1	Ca21chrR_C_albicans_SC5314	9111	Member of a family of telomere-proximal genes of unknown function; hyphal-induced expression	0	-0.457825	0.0400838	16.1527	0.0393624	0.805647	-0.429481	-0.486168
8435	CUST_5302_PI362308700	orf19.4513	0	Ca21chr2_C_albicans_SC5314	920896	Protein not essential for viability; possibly spurious ORF (Annotation Working Group prediction)	0	-1.1915	0.00401449	419.737	0.00151671	0.774785	-1.18866	-1.19433
8445	CUST_6122_PI362308700	orf19.2520	0	Ca21chrR_C_albicans_SC5314	327299	Predicted ORF in Assemblies 19, 20 and 21	MRPS28	0.609315	0.0450252	19.1382	0.0332341	0.788105	0.577477	0.641153
8450	CUST_6322_PI362308700	orf19.6225	PCL7	Ca21chr1_C_albicans_SC5314	1459337	Protein described as cyclin-like, possible Pho85p cyclin; hyphal downregulated; transcriptionally activated by Mnl1p under weak acid stress	PCL6	-0.416456	0.0192776	30.5514	0.0208302	0.798057	-0.402825	-0.430087
8457	CUST_9327_PI362308700	orf19.5552	0	Ca21chr6_C_albicans_SC5314	575657	Predicted ORF in Assemblies 19, 20 and 21	CRT10	0.306888	0.0211688	20.5021	0.0310269	0.784308	0.321857	0.291919
8477	CUST_4909_PI362308700	orf19.254	0	Ca21chr3_C_albicans_SC5314	570049	Predicted ORF in Assemblies 19, 20 and 21; Hog1p-downregulated	0	-1.35155	0.105884	18.0517	0.0352305	0.792526	-1.42643	-1.27668
8514	CUST_6778_PI362308700	orf19.2070	0	Ca21chr2_C_albicans_SC5314	90652	Predicted ORF in Assemblies 19, 20 and 21	RSC58	0.234342	0.0220131	15.0551	0.0422239	0.790329	0.249908	0.218777
8520	CUST_4250_PI362308700	orf19.2693	GST2	Ca21chr4_C_albicans_SC5314	623611	Increased transcription is observed upon benomyl treatment transcription and in populations of cells exposed to fluconazole over multiple generations; regulated by Nrg1p, Tup1p; induced by nitric oxide	URE2	-1.46353	0.0284988	72.6256	0.00876523	0.736039	-1.48368	-1.44338
8533	CUST_11719_PI362308700	orf19.1675	0	Ca21chr3_C_albicans_SC5314	365360	Predicted ORF in Assemblies 19, 20 and 21	YDL133W	0.380405	0.00458638	117.298	0.00542723	0.756112	0.377162	0.383648
8539	CUST_10350_PI362308700	orf19.1393	0	Ca21chr2_C_albicans_SC5314	1967614	Predicted ORF in Assemblies 19, 20 and 21	YIA6	0.634846	0.0671217	13.3758	0.0475064	0.787066	0.682308	0.587383
8571	CUST_8584_PI362308700	orf19.5504	0	Ca21chr7_C_albicans_SC5314	833152	Predicted ORF in Assemblies 19, 20 and 21	0	0.744448	0.0749285	14.0508	0.045232	0.79334	0.797431	0.691466
8582	CUST_5116_PI362308700	orf19.5808	0	Ca21chr2_C_albicans_SC5314	591118	Predicted ORF in Assemblies 19, 20 and 21	YBR271W	0.413044	0.0218268	26.7622	0.023777	0.805264	0.428478	0.39761
8591	CUST_5692_PI362308700	orf19.68.2	0	Ca21chr1_C_albicans_SC5314	2721027	ORF Predicted by Annotation Working Group	0	-0.138349	0.0038321	51.057	0.0124672	0.787877	-0.141059	-0.135639
8623	CUST_11079_PI362308700	orf19.1374	0	Ca21chr2_C_albicans_SC5314	1994421	Predicted ORF in Assemblies 19, 20 and 21; possibly spurious ORF (Annotation Working Group prediction)	0	-0.29069	0.024159	17.0163	0.0373693	0.798167	-0.307773	-0.273607
8629	CUST_11365_PI362308700	orf19.3649	0	Ca21chr6_C_albicans_SC5314	134314	Predicted ORF in Assemblies 19, 20 and 21	FES1	-0.824479	0.0136432	85.4631	0.00744872	0.794098	-0.834126	-0.814832
8631	CUST_7912_PI362308700	orf19.2670	0	Ca21chr4_C_albicans_SC5314	673769	Predicted ORF in Assemblies 19, 20 and 21	HTD2	-1.19544	0.095547	17.694	0.0359411	0.798258	-1.12788	-1.263
8653	CUST_7155_PI362308700	orf19.733	0	Ca21chrR_C_albicans_SC5314	1561994	Predicted ORF in Assemblies 19, 20 and 21	YBR287W	0.801586	0.0143969	78.7402	0.00808464	0.774357	0.811766	0.791406
8692	CUST_8343_PI362308700	orf19.1794	0	Ca21chr4_C_albicans_SC5314	1170295	Predicted ORF in Assemblies 19, 20 and 21	0	-0.0769936	0.000644894	168.842	0.00377046	0.810979	-0.0765376	-0.0774496
8693	CUST_783_PI362308700	orf19.3436	0	Ca21chr6_C_albicans_SC5314	296984	Predicted ORF in Assemblies 19, 20 and 21; macrophage-induced gene	0	-0.0953409	0.00282999	47.6441	0.01336	0.772613	-0.0933398	-0.097342
8695	CUST_4588_PI362308700	orf19.4181	SPC2	Ca21chr4_C_albicans_SC5314	108930	Protein with a predicted role in ER protein translocation; transcription is induced upon filamentous growth	SPC2	0.432679	0.00706293	86.6356	0.00734792	0.790224	0.427685	0.437674
8731	CUST_1531_PI362308700	orf19.1327	RBT1	Ca21chr4_C_albicans_SC5314	747433	Cell wall protein with similarity to Hwp1p, required for virulence; predicted to be cell-wall attached and glycosylated; Tup1p repressed; serum, hyphal and alkaline induced; farnesol, alpha factor induced; Rfg1p-, Rim101p-regulated	0	3.37417	0.352434	13.5395	0.0469341	0.792579	3.62337	3.12496
8753	CUST_8345_PI362308700	orf19.7092	0	Ca21chr7_C_albicans_SC5314	46309	Predicted ORF in Assemblies 19, 20 and 21	YLR290C	0.491635	0.0472434	14.7169	0.0431913	0.793891	0.525042	0.458229
8771	CUST_1444_PI362308700	orf19.6472	CYP1	Ca21chr7_C_albicans_SC5314	519625	Peptidyl-prolyl cis-trans isomerase (PPIase); activity is cyclosporin A sensitive; soluble protein in hyphae; biofilm induced, macrophage-induced protein; downregulated upon treatment of biofilm with farnesol	CPR1	-0.436887	0.0236201	26.1578	0.0243258	0.784827	-0.453589	-0.420185
8785	CUST_7716_PI362308700	orf19.4378	0	Ca21chrR_C_albicans_SC5314	848828	Predicted ORF in Assemblies 19, 20 and 21	PPH3	-0.212467	0.0223075	13.4696	0.0471768	0.789069	-0.228241	-0.196693
8787	CUST_1955_PI362308700	orf19.1756	GPD1	Ca21chr2_C_albicans_SC5314	2107827	Protein similar to S. cerevisiae glycerol-3-phosphate dehydrogenase (enzyme of glycerol biosynthesis); biofilm-induced expression; regulated by Efg1p; regulated by Tsa1p, Tsa1Bp under H2O2 stress conditions	GPD1	-1.33839	0.0527273	35.8973	0.0177299	0.799149	-1.3011	-1.37567
8796	CUST_8544_PI362308700	orf19.4879.2	NTF2	Ca21chr1_C_albicans_SC5314	2212873	ORF Predicted by Annotation Working Group; regulated by Ssn6p	NTF2	-0.0824343	0.00486252	23.9751	0.0265379	0.799398	-0.078996	-0.0858726
8798	CUST_6114_PI362308700	orf19.2527	0	Ca21chrR_C_albicans_SC5314	334487	Predicted ORF in Assemblies 19, 20 and 21; induced upon biofilm formation	YNL035C	0.765206	0.0120664	89.6839	0.00709819	0.791126	0.773738	0.756674
8802	CUST_5441_PI362308700	orf19.7181	0	Ca21chr7_C_albicans_SC5314	870489	Predicted ORF in Assemblies 19, 20 and 21	0	0.947141	0.0953694	14.045	0.0452509	0.791406	1.01458	0.879705
8807	CUST_3170_PI362308700	orf19.5071	NRP1	Ca21chr1_C_albicans_SC5314	1747314	Predicted ORF in Assemblies 19, 20 and 21; fungal-specific (no human or murine homolog)	NRP1	1.08611	0.0076607	200.502	0.0031751	0.810972	1.08069	1.09152
8830	CUST_11918_PI362308700	orf19.1821	0	Ca21chr1_C_albicans_SC5314	1324825	Predicted ORF in Assemblies 19, 20 and 21; transcription is repressed in response to alpha pheromone in SpiderM medium	0	0.175786	0.00776634	32.0098	0.0198818	0.804459	0.170294	0.181278
8839	CUST_7768_PI362308700	orf19.4368	0	Ca21chrR_C_albicans_SC5314	823246	Predicted ORF in Assemblies 19, 20 and 21	FRA1	-0.847031	0.0176935	67.702	0.00940258	0.763415	-0.859542	-0.834519
8844	CUST_10708_PI362308700	orf19.6643	MCT1	Ca21chrR_C_albicans_SC5314	1209498	Putative malonyl-CoA acyl carrier protein acyltransferase	MCT1	-0.536108	0.00497156	152.502	0.00417445	0.775436	-0.539623	-0.532593
8888	CUST_10300_PI362308700	orf19.834	0	Ca21chr2_C_albicans_SC5314	818868	Predicted ORF in Assemblies 19, 20 and 21	MNL1	-0.865329	0.000657533	1861.14	0.000342059	1.04841	-0.864864	-0.865794
8892	CUST_5060_PI362308700	orf19.7323	CBP1	Ca21chrR_C_albicans_SC5314	1970339	Corticosteroid binding protein; transcription induced at late log-phase or upon adherence to polystyrene; not induced by corticosterone; contains a possible NAD/FAD binding region; regulated by Nrg1p, Tup1p	FMS1	-0.746901	0.0350094	30.1712	0.0210925	0.800602	-0.722145	-0.771656
8895	CUST_11657_PI362308700	orf19.1691	0	Ca21chr3_C_albicans_SC5314	335873	Predicted ORF in Assemblies 19, 20 and 21; fluconazole-induced; filament induced; Hog1p-induced; regulated by Nrg1p, Tup1p; increased expression in response to prostaglandins	AIM38	-2.84935	0.2103	19.1612	0.0331944	0.788688	-2.70065	-2.99806
8925	CUST_2969_PI362308700	orf19.1988	CDC45	Ca21chrR_C_albicans_SC5314	1675738	Protein described as a DNA replication initiation factor; transcriptionally regulated by interaction with macrophage	CDC45	-0.598075	0.0449304	18.8248	0.0337864	0.790499	-0.629846	-0.566304
8930	CUST_8848_PI362308700	orf19.2214	0	Ca21chr2_C_albicans_SC5314	1568309	Predicted ORF in Assemblies 19, 20 and 21	MRPL7	0.768645	0.00201062	540.644	0.00117752	0.802022	0.770066	0.767223
8943	CUST_10189_PI362308700	orf19.4960	0	Ca21chr1_C_albicans_SC5314	2908446	Predicted ORF in Assemblies 19, 20 and 21	SPE4	0.947438	0.0948408	14.1277	0.0449869	0.794725	0.880375	1.0145
8969	CUST_8728_PI362308700	orf19.2250	SPE3	Ca21chr2_C_albicans_SC5314	1427916	Predicted ORF in Assemblies 19, 20 and 21	SPE3	0.807936	0.0461687	24.7482	0.0257099	0.795967	0.840582	0.775289
8988	CUST_7280_PI362308700	orf19.1283	MEC1	Ca21chr5_C_albicans_SC5314	909145	Protein described as cell cycle checkpoint protein; RNA abundance regulated by tyrosol and cell density	MEC1	-0.60561	0.0200323	42.754	0.0148876	0.807618	-0.591445	-0.619775
9016	CUST_10190_PI362308700	orf19.4960	0	Ca21chr1_C_albicans_SC5314	2908446	Predicted ORF in Assemblies 19, 20 and 21	SPE4	0.966548	0.103088	13.2596	0.0479212	0.788609	0.893654	1.03944
9025	CUST_8385_PI362308700	orf19.7084	DFI1	Ca21chr7_C_albicans_SC5314	59071	Cell-surface associated glycoprotein; promotes activation of Cek1p in a matrix-dependent manner; N-glycosylated	0	0.949168	0.0532121	25.226	0.0252235	0.788877	0.986795	0.911541
9040	CUST_3875_PI362308700	orf19.4262	0	Ca21chr5_C_albicans_SC5314	559089	Predicted ORF in Assemblies 19, 20 and 21	JSN1	-0.436538	0.0276243	22.3483	0.0284673	0.795009	-0.417004	-0.456071
9048	CUST_4653_PI362308700	orf19.4166	ZCF21	Ca21chr4_C_albicans_SC5314	131943	Predicted zinc-finger protein of unknown function; possibly an essential gene, disruptants not obtained by UAU1 method	LYS14	-1.01366	0.0497205	28.8317	0.0220717	0.807757	-0.978501	-1.04882
9069	CUST_11983_PI362308700	orf19.7436.1	ECM15	Ca21chr3_C_albicans_SC5314	1479788	ORF Predicted by Annotation Working Group; caspofungin repressed	ECM15	-1.12979	0.0412221	38.76	0.016421	0.792604	-1.10064	-1.15894
9097	CUST_667_PI362308700	orf19.1279	CDS1	Ca21chr5_C_albicans_SC5314	913853	Protein similar to S. cerevisiae Cds1p; transposon mutation affects filamentous growth	CDS1	0.727657	0.0629221	16.3545	0.0388778	0.80378	0.683164	0.772149
9119	CUST_7712_PI362308700	orf19.4379	PRP13	Ca21chrR_C_albicans_SC5314	849450	Predicted ORF in Assemblies 19, 20 and 21; fungal-specific (no human or murine homolog)	YME2	-0.948087	0.0979718	13.6855	0.0464351	0.790687	-0.878811	-1.01736
9132	CUST_1643_PI362308700	orf19.6166	0	Ca21chr3_C_albicans_SC5314	180785	Predicted ORF in Assemblies 19, 20 and 21	YDR444W	0.346153	0.00631748	77.489	0.00821516	0.751626	0.341686	0.35062
9158	CUST_7394_PI362308700	orf19.5938	SEN1	Ca21chr3_C_albicans_SC5314	1014996	Predicted ORF in Assemblies 19, 20 and 21; decreased expression in response to prostaglandins	SEN1	0.716312	0.0335607	30.1846	0.0210832	0.802732	0.692581	0.740043
9165	CUST_8301_PI362308700	orf19.3981	MAL31	Ca21chr5_C_albicans_SC5314	1076005	Putative protein of unknown function, transcription is upregulated in clinical isolates from HIV+ patients with oral candidiasis; alkaline upregulated	MAL31	1.48004	0.0909505	23.0136	0.0276454	0.795617	1.41573	1.54435
9198	CUST_4804_PI362308700	orf19.680	0	Ca21chr1_C_albicans_SC5314	2469636	Predicted ORF in Assemblies 19, 20 and 21	TIM50	-0.14195	0.00506665	39.6213	0.0160642	0.794142	-0.145532	-0.138367
9217	CUST_267_PI362308700	orf19.5492	0	Ca21chr2_C_albicans_SC5314	1279836	Predicted ORF in Assemblies 19, 20 and 21	YHC1	0.87978	0.0887114	14.0252	0.0453144	0.790263	0.817051	0.942508
9229	CUST_7343_PI362308700	orf19.1590	0	Ca21chr2_C_albicans_SC5314	904041	Predicted ORF in Assemblies 19, 20 and 21	0	-0.392646	0.0395631	14.0354	0.0452816	0.790815	-0.420621	-0.36467
9232	CUST_10582_PI362308700	orf19.909.1	0	Ca21chr2_C_albicans_SC5314	657188	Predicted ORF in Assembly 20 and 21; gene has intron	0	0.76733	0.0715331	15.1702	0.0419046	0.789171	0.817912	0.716749
9268	CUST_966_PI362308700	orf19.6598	WAL1	Ca21chrR_C_albicans_SC5314	2050368	Protein required for hyphal growth and for wild-type cell morphology, polarized budding, endocytosis, vacuole morphology; similar to Wiskott-Aldrich syndrome protein; localizes to cortical actin patches and hyphal tips	LAS17	-0.657553	0.0632948	14.6919	0.0432647	0.791679	-0.612797	-0.702309
9281	CUST_1508_PI362308700	orf19.1332	SNG4	Ca21chr7_C_albicans_SC5314	756801	Predicted ORF in Assemblies 19, 20 and 21; transcriptionally activated by Mnl1p under weak acid stress; shows Mob2p-dependent hyphal regulation	SNG1	0.622985	0.054678	16.1131	0.0394588	0.804933	0.661648	0.584321
9308	CUST_8035_PI362308700	orf19.4812	0	Ca21chr1_C_albicans_SC5314	2090037	Predicted ORF in Assemblies 19, 20 and 21	0	-0.840121	0.0657665	18.0656	0.0352035	0.793372	-0.886625	-0.793617
9314	CUST_3665_PI362308700	orf19.4751	0	Ca21chr1_C_albicans_SC5314	1938588	Predicted ORF in Assemblies 19, 20 and 21	RSM25	0.579482	0.0307036	26.6911	0.0238403	0.800772	0.557772	0.601193
9316	CUST_3027_PI362308700	orf19.1974	TFS1	Ca21chr5_C_albicans_SC5314	213880	Transcription is regulated upon yeast-hyphal switch; shows colony morphology-related gene regulation by Ssn6p	TFS1	-0.995264	0.00885695	158.916	0.00400595	0.779571	-0.989001	-1.00153
9337	CUST_1388_PI362308700	orf19.6494	WHI3	Ca21chr7_C_albicans_SC5314	480373	Predicted ORF in Assemblies 19, 20 and 21; induced during infection of murine kidney, compared to growth in vitro; has murine homolog	WHI4	0.16649	0.00388999	60.5278	0.0105169	0.791022	0.16924	0.163739
9368	CUST_12103_PI362308700	orf19.5114	0	Ca21chr1_C_albicans_SC5314	1832442	Predicted ORF in Assemblies 19, 20 and 21	SNX3	-0.426048	0.0107833	55.8756	0.0113923	0.812033	-0.418423	-0.433673
9389	CUST_4959_PI362308700	orf19.7347	0	Ca21chr3_C_albicans_SC5314	1269897	Predicted ORF in Assemblies 19, 20 and 21	UBC6	0.597027	0.0646992	13.05	0.0486881	0.789571	0.551277	0.642776
9398	CUST_155_PI362308700	orf19.6041	RPO41	Ca21chr1_C_albicans_SC5314	111028	Predicted ORF in Assemblies 19, 20 and 21; downregulated during core stress response	RPO41	0.601375	0.00519751	163.631	0.00389053	0.80844	0.605051	0.5977
9404	CUST_2500_PI362308700	orf19.4791	0	Ca21chr1_C_albicans_SC5314	2048958	Predicted ORF in Assemblies 19, 20 and 21	0	-0.0453432	0.000821561	78.0527	0.00815584	0.757504	-0.0459242	-0.0447623
9433	CUST_10027_PI362308700	orf19.3218	0	Ca21chr5_C_albicans_SC5314	865191	Putative multidrug resistance protein; upregulated by Efg1p	YJR124C	-0.20867	0.0222855	13.242	0.0479849	0.788599	-0.224428	-0.192911
9443	CUST_5050_PI362308700	orf19.223	0	Ca21chr2_C_albicans_SC5314	1797692	Predicted ORF in Assemblies 19, 20 and 21; increased expression in response to prostaglandins; possibly an essential gene, disruptants not obtained by UAU1 method	FPK1	-0.227076	0.0134881	23.8086	0.0267233	0.799093	-0.217538	-0.236613
9450	CUST_1317_PI362308700	orf19.1613	ILV2	Ca21chr3_C_albicans_SC5314	507203	Protein described as acetolactate synthase; regulated by Gcn4p; induced in response to amino acid starvation (3-aminotriazole treatment); protein detected by mass spec in stationary phase cultures	ILV2	-0.603077	0.0252385	33.7927	0.0188335	0.818788	-0.620923	-0.585231
9452	CUST_4334_PI362308700	orf19.6773	ECM29	Ca21chr3_C_albicans_SC5314	1668511	Protein similar to S. cerevisiae Ecm29p; transposon mutation affects filamentous growth	ECM29	-0.322719	0.0342858	13.3115	0.0477352	0.787663	-0.298476	-0.346963
9478	CUST_3385_PI362308700	orf19.5864	URK1	Ca21chr3_C_albicans_SC5314	877330	Protein described as similar to uridine kinase; transcription is downregulated in response to treatment with ciclopirox olamine	URK1	-0.445484	0.0286415	21.9964	0.0289221	0.795035	-0.465736	-0.425231
9493	CUST_156_PI362308700	orf19.6041	RPO41	Ca21chr1_C_albicans_SC5314	111028	Predicted ORF in Assemblies 19, 20 and 21; downregulated during core stress response	RPO41	0.473093	0.0262865	25.4524	0.0249993	0.789926	0.491681	0.454506
9498	CUST_4408_PI362308700	orf19.4575	0	Ca21chr4_C_albicans_SC5314	429978	Predicted ORF in Assemblies 19, 20 and 21	YPL109C	0.61128	0.0540001	16.0089	0.0397151	0.796902	0.573097	0.649464
9499	CUST_7618_PI362308700	orf19.2119	NDT80	Ca21chr2_C_albicans_SC5314	19691	Activator of CDR1 induction by antifungal drugs; required for wild-type drug resistance; transcriptionally induced upon antifungal drug treatment; similar to S. cerevisiae Ndt80p, which is a meiosis-specific transcriptional regulator	NDT80	-0.201755	0.0143943	19.8221	0.0320895	0.79318	-0.211933	-0.191576
9540	CUST_4842_PI362308700	orf19.665	NEP1	Ca21chr1_C_albicans_SC5314	2495756	Protein of unknown function; ortholog of S. cerevisiae Emg1p, which is involved in ribosome biogenesis	EMG1	0.733364	0.0336832	30.7908	0.0206684	0.796837	0.709546	0.757181
9552	CUST_5825_PI362308700	orf19.797	BAT21	Ca21chr2_C_albicans_SC5314	887895	Protein described as a branched chain amino acid aminotransferase; regulated by Gcn4p, Gcn2p; induced in response to amino acid starvation (3-aminotriazole treatment)	BAT2	-2.03957	0.0899891	32.0526	0.0198553	0.808722	-1.97594	-2.1032
9559	CUST_8606_PI362308700	orf19.1149	MRF1	Ca21chr1_C_albicans_SC5314	2563794	Protein similar to mitochondrial respiratory proteins; increased transcription observed upon benomyl treatment; induced by farnesol, nitric oxide, core stress response; oxidative stress-induced via Cap1p	ETR1	-1.844	0.13098	19.91	0.031948	0.794489	-1.93661	-1.75138
9598	CUST_8972_PI362308700	orf19.5419	ATP5	Ca21chr3_C_albicans_SC5314	65437	Predicted ORF in Assemblies 19, 20 and 21; caspofungin repressed; protein level decreased in stationary phase cultures	ATP5	0.0471157	0.00509397	13.0805	0.0485749	0.78878	0.0507177	0.0435137
9611	CUST_6718_PI362308700	orf19.3047	0	Ca21chr1_C_albicans_SC5314	726816	Predicted ORF in Assemblies 19, 20 and 21	SIP3	-0.687488	0.0297031	32.7324	0.0194432	0.816347	-0.666485	-0.708491
9614	CUST_6004_PI362308700	orf19.5231.2	0	Ca21chr1_C_albicans_SC5314	2687617	ORF Predicted by Annotation Working Group	ATP19	0.393644	0.0354383	15.7089	0.0404714	0.801583	0.368585	0.418702
9617	CUST_596_PI362308700	orf19.3796	0	Ca21chr4_C_albicans_SC5314	1037525	Putative Dicer RNAse involved in RNA interference, similar to S. cerevisiae Rnt1p but orthologous to S. castellii Dcr1p, which is not conserved in S. cerevisiae; predicted ORF in Assemblies 19, 20 and 21	RNT1	-0.18452	0.00504663	51.7079	0.0123103	0.802789	-0.180952	-0.188089
9625	CUST_9053_PI362308700	orf19.3222	0	Ca21chrR_C_albicans_SC5314	316505	Predicted ORF in Assemblies 19, 20 and 21; fungal-specific (no human or murine homolog)	YGR125W	0.356045	0.0290113	17.3561	0.0366394	0.802141	0.335531	0.376559
9629	CUST_9435_PI362308700	orf19.3357	0	Ca21chr1_C_albicans_SC5314	342459	Predicted ORF in Assemblies 19, 20 and 21	FYV4	0.724192	0.0777462	13.1732	0.0482346	0.788474	0.779167	0.669217
9677	CUST_6563_PI362308700	orf19.5248	MSO1	Ca21chr1_C_albicans_SC5314	2655623	Predicted ORF in Assemblies 19, 20 and 21; expression is down-regulated during pseudohyphal growth in the presence of lysed macrophages	0	-1.30328	0.0206706	89.166	0.00713942	0.788552	-1.31789	-1.28866
9679	CUST_10925_PI362308700	orf19.385	GCV2	Ca21chr1_C_albicans_SC5314	1849496	Putative protein of glycine catabolism; downregulated by Efg1p; Hog1p-induced; upregulated by Rim101p at acid pH; transcription is activated in the presence of elevated CO2; protein detected by mass spec in stationary phase cultures	GCV2	1.88457	0.0901676	29.5581	0.0215297	0.807198	1.94833	1.82081
9698	CUST_1542_PI362308700	orf19.1321	HWP1	Ca21chr4_C_albicans_SC5314	762939	Hyphal cell wall protein; covalently crosslinked to epithelial cells by host transglutaminase; opaque- and a-specific, alpha-factor induced; at MTLa side of conjugation tube; assessment of virulence role complicated by URA3 effects	0	5.22351	0.539732	13.6867	0.0464312	0.79172	5.60516	4.84186
9724	CUST_5600_PI362308700	orf19.2452	0	Ca21chr1_C_albicans_SC5314	1249509	Transcriptionally regulated by iron; expression greater in high iron; downregulated in core caspofungin response; ketoconazole-repressed; shows colony morphology-related gene regulation by Ssn6p; possibly subject to Kex2p processing	0	-1.31154	0.0351147	52.821	0.012051	0.807348	-1.33637	-1.28671
9735	CUST_1093_PI362308700	orf19.7219	FTR1	Ca21chr1_C_albicans_SC5314	3113806	High-affinity iron permease (ferric citrate, ferrioxamines E or B, transferrin); required for mouse virulence, low-iron growth; iron, amphotericin B, caspofungin, ciclopirox, Hog1p regulated; complements S. cerevisiae ftr1 iron transport	FTR1	-0.327889	0.00332606	139.416	0.00456626	0.799749	-0.330241	-0.325537
9762	CUST_5519_PI362308700	orf19.1857	0	Ca21chrR_C_albicans_SC5314	1454635	Protein not essential for viability	SPT10	-0.782276	0.0690314	16.0261	0.0396724	0.79866	-0.831089	-0.733464
9771	CUST_532_PI362308700	orf19.5999	DYN1	Ca21chr3_C_albicans_SC5314	1143880	Dynein heavy chain; dynein is a motor protein that moves toward the microtubule minus end; required for wild-type yeast-form cell separation, spindle positioning, nuclear migration, hyphal growth; transcription is regulated by Mig1p	DYN1	-0.0943237	0.00855813	15.5868	0.0407876	0.798812	-0.100375	-0.0882722
9787	CUST_8389_PI362308700	orf19.7083	DCC1	Ca21chr7_C_albicans_SC5314	60279	Predicted ORF in Assemblies 19, 20 and 21; cell-cycle regulated periodic mRNA expression	DCC1	-0.284335	0.00211583	190.048	0.00334976	0.838123	-0.285831	-0.282838
9795	CUST_11466_PI362308700	orf19.5455	0	Ca21chr3_C_albicans_SC5314	23092	Predicted ORF in Assemblies 19, 20 and 21	VTC1	0.520009	0.018186	40.4379	0.0157399	0.797403	0.532868	0.50715
9802	CUST_2222_PI362308700	orf19.2839	CIRT4B	Ca21chrR_C_albicans_SC5314	641823	Decreased transcription is observed in an azole-resistant strain that overexpresses CDR1 and CDR2	0	0.276134	0.0107054	36.478	0.0174478	0.798172	0.283704	0.268565
9805	CUST_572_PI362308700	orf19.5980	0	Ca21chr3_C_albicans_SC5314	1096284	Predicted ORF in Assemblies 19, 20 and 21	0	-0.663727	0.067964	13.811	0.0460148	0.795686	-0.711784	-0.615669
9827	CUST_4242_PI362308700	orf19.2697	0	Ca21chr4_C_albicans_SC5314	609473	Predicted ORF in Assemblies 19, 20 and 21	UBR1	1.08273	0.100508	15.2348	0.0417274	0.793143	1.01166	1.1538
9833	CUST_1603_PI362308700	orf19.6187	0	Ca21chr3_C_albicans_SC5314	1782398	Predicted ORF in Assemblies 19, 20 and 21; overlaps orf19.6185 and orf19.6188	0	-0.332937	0.0141523	33.2698	0.0191293	0.820019	-0.342945	-0.32293
9858	CUST_9308_PI362308700	orf19.637	SDH2	Ca21chrR_C_albicans_SC5314	1120441	Succinate dehydrogenase, Fe-S subunit; localizes to surface of yeast-form cells, but not hyphae; transcriptionally regulated by iron; expression greater in high iron; repressed by nitric oxide; induced during log phase (aerobic growth)	SDH2	0.502804	0.0247484	28.732	0.0221482	0.803363	0.520304	0.485304
9872	CUST_2367_PI362308700	orf19.1860.1	0	Ca21chr2_C_albicans_SC5314	1561733	Predicted ORF in Assemblies 19, 20 and 21	0	-0.276704	0.024572	15.9254	0.0399228	0.795859	-0.294079	-0.259329
9878	CUST_3205_PI362308700	orf19.1942	SGE1	Ca21chr5_C_albicans_SC5314	286755	Protein described as a multidrug resistance factor; transcriptionally regulated by iron; expression greater in low iron	VBA5	-1.41595	0.0985644	20.3162	0.0313102	0.784997	-1.48565	-1.34626
9886	CUST_4253_PI362308700	orf19.2690	0	Ca21chr4_C_albicans_SC5314	627864	Predicted ORF in Assemblies 19, 20 and 21	MGM1	-0.427802	0.0411614	14.6983	0.0432458	0.792516	-0.456907	-0.398696
9896	CUST_10316_PI362308700	orf19.5753	HGT10	Ca21chr6_C_albicans_SC5314	819168	Glycerol permease involved in glycerol uptake; member of the major facilitator superfamily; induced by osmotic stress, at low glucose in rich media, during cell wall regeneration; 12 membrane spans	STL1	3.69851	0.221773	23.5849	0.0269765	0.793122	3.85533	3.5417
9908	CUST_5653_PI362308700	orf19.2440	0	Ca21chr1_C_albicans_SC5314	1268667	Predicted ORF in Assemblies 19, 20 and 21; transcription is induced in response to alpha pheromone in SpiderM medium	CUL3	0.522848	0.0348985	21.1877	0.0300244	0.784858	0.498171	0.547525
9925	CUST_1435_PI362308700	orf19.54	RHD1	Ca21chr1_C_albicans_SC5314	1048370	Putative beta-mannosyltransferase, required for the addition of beta-mannose to the acid-labile fraction of cell wall phosphopeptidomannan; member of a 9-gene family; transcriptionally regulated on yeast-hyphal and white-opaque switches	0	-0.880187	0.0758187	16.4177	0.0387285	0.804765	-0.933799	-0.826575
9929	CUST_6257_PI362308700	orf19.6245	0	Ca21chr1_C_albicans_SC5314	1422978	Predicted ORF in Assemblies 19, 20 and 21; regulated by osmotic stress (via Hog1p) and oxidative stress (Hog1p- and Cap1p-independent); transcription is induced in response to alpha pheromone in SpiderM medium	0	0.105766	0.00774736	19.3066	0.0329447	0.790415	0.100288	0.111244
9949	CUST_11289_PI362308700	orf19.5839	PDR17	Ca21chr2_C_albicans_SC5314	537582	Predicted ORF in Assemblies 19, 20 and 21; role in sensitivity to fluconazole, specifically; fungal-specific (no human or murine homolog)	PDR16	0.0471567	0.00303868	21.9469	0.0289872	0.793266	0.0493054	0.0450081
9953	CUST_7620_PI362308700	orf19.2117	LEU5	Ca21chr2_C_albicans_SC5314	21541	Predicted ORF in Assemblies 19, 20 and 21; transcription is upregulated in both intermediate and mature biofilms	LEU5	0.774411	0.0298069	36.7426	0.0173222	0.798385	0.795487	0.753334
9959	CUST_4943_PI362308700	orf19.5170	ENA21	Ca21chr7_C_albicans_SC5314	629811	Predicted ORF similar to S. cerevisiae sodium transporters Ena1p and Ena5p; Gcn4p-regulated; flucytosine, amphotericin B, or ketoconazole-induced; osmotic stress-induced; overlaps orf19.5170.1, which is annotated as a blocked reading frame	ENA2	1.31446	0.0746292	24.9088	0.0255443	0.794855	1.26169	1.36723
9966	CUST_5429_PI362308700	orf19.1886	RCL1	Ca21chr2_C_albicans_SC5314	1522721	Predicted ORF in Assemblies 19, 20 and 21; essential; downregulated during core stress response; S. cerevisiae ortholog is essential	RCL1	0.613364	0.0539284	16.0848	0.0395281	0.801015	0.575231	0.651497
9987	CUST_7434_PI362308700	orf19.1573	0	Ca21chr2_C_albicans_SC5314	500706	Predicted ORF in Assemblies 19, 20 and 21	YPK9	0.651718	0.028632	32.1902	0.0197705	0.807953	0.631472	0.671964
10003	CUST_7350_PI362308700	orf19.5943	0	Ca21chr3_C_albicans_SC5314	1022771	Predicted ORF in Assemblies 19, 20 and 21	PEX28	-0.806649	0.0669291	17.0445	0.0373076	0.79824	-0.759323	-0.853975
10044	CUST_10388_PI362308700	orf19.5741	ALS1	Ca21chr6_C_albicans_SC5314	791472	Adhesin; ALS family of cell-surface glycoproteins; adhesion, virulence roles; immunoprotective; in band at hyphal base; amyloid domain; biofilm-induced; Rfg1p, Ssk1p, growth-regulated; strain background affects expression	SAG1	2.62628	0.276048	13.4546	0.0472292	0.787797	2.82147	2.43108
10047	CUST_10858_PI362308700	orf19.2606	HDA1	Ca21chrR_C_albicans_SC5314	451924	Histone deacetylase; conserved deacetylation motif; regulates white-to-opaque switching frequency but not opaque-to-white switching; greater expression in white cells than opaque cells; inhibited by trichostatin-A; inducer of filamentation	HDA1	1.47643	0.0995444	20.9755	0.0303277	0.789421	1.54682	1.40605
10053	CUST_7992_PI362308700	orf19.4823	LIP6	Ca21chr1_C_albicans_SC5314	2115617	Secreted lipase, member of family of lipase genes expressed differentially in response to carbon source and during infection; may have a role in nutrition and/or in creating an acidic microenvironment; induced on adherence to polystyrene	0	-0.215403	0.00528379	57.6528	0.0110412	0.810569	-0.211667	-0.219139
10065	CUST_9700_PI362308700	orf19.6307	0	Ca21chrR_C_albicans_SC5314	1053468	Predicted ORF in Assemblies 19, 20 and 21; possibly spurious ORF (Annotation Working Group prediction)	0	-0.0440537	0.0029762	20.9332	0.0303889	0.789338	-0.0419492	-0.0461582
10068	CUST_707_PI362308700	orf19.5628	0	Ca21chr6_C_albicans_SC5314	714650	Predicted ORF in Assemblies 19, 20 and 21; possibly an essential gene, disruptants not obtained by UAU1 method	DIC1	-1.57569	0.0397604	56.0448	0.0113579	0.819106	-1.54758	-1.60381
10075	CUST_9947_PI362308700	orf19.2746	0	Ca21chr4_C_albicans_SC5314	529387	Predicted ORF in Assemblies 19, 20 and 21	EMP70	1.19917	0.109197	15.5305	0.0409351	0.797876	1.12196	1.27639
10096	CUST_262_PI362308700	orf19.5496	AVT1	Ca21chr2_C_albicans_SC5314	1290576	Predicted ORF in Assemblies 19, 20 and 21; bound by a1p and alpha2p by ChIP-chip analysis	AVT1	0.599836	0.0352963	24.0336	0.0264735	0.801396	0.574878	0.624795
10118	CUST_6070_PI362308700	orf19.4716	GDH3	Ca21chr4_C_albicans_SC5314	1362564	Protein described as similar to NADP-glutamate dehydrogenase; hyphal downregulated expression; transcription is regulated by Nrg1p, Plc1p; downregulated by Efg1p; upregulated by Rim101p at pH 8; ciclopirox olamine induced	GDH3	-1.73033	0.0517632	47.274	0.0134646	0.771382	-1.69373	-1.76693
10137	CUST_174_PI362308700	orf19.6038	UGA32	Ca21chr1_C_albicans_SC5314	115879	Predicted zinc-finger protein of unknown function; has similarity to S. cerevisiae Uga3p, which is a transcription factor involved in the regulation of gamma-aminobutyrate metabolism genes	UGA3	-0.326793	0.0140815	32.8201	0.0193913	0.816965	-0.316836	-0.33675
10146	CUST_2313_PI362308700	orf19.588	0	Ca21chr5_C_albicans_SC5314	198313	Predicted ORF in Assemblies 19, 20 and 21	MIC14	0.600143	0.0549068	15.4576	0.0411275	0.799086	0.561318	0.638968
10174	CUST_9726_PI362308700	orf19.4118	CNT	Ca21chr2_C_albicans_SC5314	1232842	Cation-coupled nucleoside transporter (H(+)/nucleoside symporter); CNT family; transports adenosine, uridine, inosine, guanosine, tubercidin; variant alleles encode high- and low-affinity isoforms; S or G at residue 328 affects specificity	0	-0.600365	0.0328205	25.8693	0.0245968	0.785305	-0.577157	-0.623572
10202	CUST_10285_PI362308700	orf19.3583	0	Ca21chr2_C_albicans_SC5314	1127371	Predicted ORF in Assemblies 19, 20 and 21	YRB2	-0.449313	0.0433003	14.6748	0.0433147	0.789062	-0.479931	-0.418695
10205	CUST_8028_PI362308700	orf19.4815	YTM1	Ca21chr1_C_albicans_SC5314	2093301	Protein similar to S. cerevisiae Ytm1p, which is involved in biogenesis of the large ribosomal subunit; transposon mutation affects filamentous growth; protein level decreased in stationary phase cultures	YTM1	0.991729	0.0642657	21.8237	0.0291506	0.790678	0.946286	1.03717
10216	CUST_6099_PI362308700	orf19.4705	0	Ca21chr4_C_albicans_SC5314	157322	Predicted ORF in Assemblies 19, 20 and 21	CCA1	0.286682	0.0144801	27.9991	0.0227275	0.800686	0.296921	0.276443
10228	CUST_1197_PI362308700	orf19.5027	LCB2	Ca21chr1_C_albicans_SC5314	3063251	Predicted ORF in Assemblies 19, 20 and 21; mutation confers hypersensitivity to aureobasidin A	LCB2	0.690824	0.0519047	18.8224	0.0337906	0.789092	0.727526	0.654121
10233	CUST_6715_PI362308700	orf19.5221	0	Ca21chr1_C_albicans_SC5314	2704703	Predicted ORF in Assemblies 19, 20 and 21	AVO1	-0.53641	0.0255493	29.6916	0.021433	0.808517	-0.518344	-0.554476
10235	CUST_1942_PI362308700	orf19.3932	0	Ca21chr5_C_albicans_SC5314	980773	Predicted ORF in Assemblies 19, 20 and 21; induced in core caspofungin response; increased expression observed in ssr1 homozygous null mutant; induced by nitric oxide in yhb1 mutant; protein detected by mass spec in stationary phase culture	0	1.94007	0.0862309	31.8177	0.0200018	0.798767	1.87909	2.00104
10245	CUST_11446_PI362308700	orf19.7637	YHB4	Ca21chrR_C_albicans_SC5314	2245358	Protein related to flavohemoglobins; not required for wild-type nitric oxide resistance; has predicted globin, FAD-binding, and NAD(P)-binding domains but lacks some conserved residues of flavohemoglobins; no mRNA detected	YHB1	-0.92541	0.0113345	115.464	0.00551344	0.751054	-0.917395	-0.933424
10252	CUST_2025_PI362308700	orf19.3919	0	Ca21chr5_C_albicans_SC5314	960282	Predicted ORF in Assemblies 19, 20 and 21	0	0.977126	0.0135629	101.886	0.00624817	0.773764	0.967535	0.986716
10277	CUST_5738_PI362308700	orf19.2411	0	Ca21chrR_C_albicans_SC5314	710988	Predicted ORF in Assemblies 19, 20 and 21	SYN8	-0.0635643	0.00433271	20.7476	0.0306603	0.786391	-0.0666279	-0.0605006
10279	CUST_8968_PI362308700	orf19.1060	0	Ca21chr1_C_albicans_SC5314	881950	Predicted ORF in Assemblies 19, 20 and 21; possibly spurious ORF (Annotation Working Group prediction)	0	-0.286622	0.0171338	23.6577	0.0268937	0.796416	-0.274507	-0.298738
10289	CUST_1571_PI362308700	orf19.1304	0	Ca21chr4_C_albicans_SC5314	795663	Predicted ORF in Assemblies 19, 20 and 21	RRP4	-0.0996035	0.0102615	13.7271	0.046295	0.792704	-0.0923476	-0.106859
10297	CUST_12031_PI362308700	orf19.5139	0	Ca21chr7_C_albicans_SC5314	685158	Predicted ORF in Assemblies 19, 20 and 21	0	-0.0520502	0.000162634	452.612	0.00140654	0.821154	-0.0521652	-0.0519352
10299	CUST_11588_PI362308700	orf19.518	0	Ca21chrR_C_albicans_SC5314	958491	Predicted ORF in Assemblies 19, 20 and 21	NCL1	0.155467	0.0054448	40.3804	0.0157623	0.795252	0.159317	0.151617
10311	CUST_3487_PI362308700	orf19.1492	PRP39	Ca21chr2_C_albicans_SC5314	336574	Putative component of the U1 snRNP, involved in splicing; ortholog of S. cerevisiae PRP39; predicted ORF in Assemblies 19, 20 and 21	PRP39	0.5143	0.0386199	18.833	0.0337717	0.791664	0.541608	0.486991
10315	CUST_6655_PI362308700	orf19.3053	0	Ca21chr1_C_albicans_SC5314	739753	Predicted ORF in Assemblies 19, 20 and 21; identified in extracts from biofilm and planktonic cells; protein detected by mass spec in exponential and stationary phase cultures	0	-0.729494	0.0610164	16.9079	0.0376083	0.800483	-0.686349	-0.77264
10323	CUST_6558_PI362308700	orf19.7422	0	Ca21chr3_C_albicans_SC5314	1456910	Predicted ORF in Assemblies 19, 20 and 21	LCP5	0.594744	0.0649572	12.9484	0.0490683	0.79155	0.548812	0.640675
10325	CUST_7735_PI362308700	orf19.4371	TAL1	Ca21chrR_C_albicans_SC5314	831860	Predicted ORF in Assemblies 19, 20 and 21; biofilm induced; oxidative stress-induced via Cap1p; induced by nitric oxide in yhb1 mutant; protein detected by mass spec in exponential and stationary phase cultures	TAL1	-0.36206	0.0378734	13.5195	0.0470032	0.79048	-0.33528	-0.388841
10389	CUST_5647_PI362308700	orf19.2444	CHS7	Ca21chr1_C_albicans_SC5314	1263887	Protein required for wild-type chitin synthase III activity; similar to (but not functional homolog of) S. cerevisiae Chs7p, which effects ER export of Chs3p; induced in homozygous cyr1 null mutant hyphae and ras1 yeast-form cells	CHS7	1.40679	0.0242816	81.9345	0.00776948	0.762031	1.42396	1.38962
10401	CUST_1027_PI362308700	orf19.4393	CIT1	Ca21chrR_C_albicans_SC5314	777837	Protein described as citrate synthase; soluble protein in hyphae; biofilm induced; expression greater in high iron; upregulated upon phagocytosis; Hog1p-downregulated; regulated by Efg1p under yeast-form but not hyphal growth conditions	CIT1	1.87205	0.185023	14.309	0.0444188	0.79384	2.00289	1.74122
10413	CUST_1330_PI362308700	orf19.1606	0	Ca21chr3_C_albicans_SC5314	524220	Predicted ORF in Assemblies 19, 20 and 21; Plc1p-regulated	0	4.29505	0.423182	14.3534	0.0442816	0.797199	3.99581	4.59428
10419	CUST_6694_PI362308700	orf19.5229	0	Ca21chr1_C_albicans_SC5314	2690877	Predicted ORF in Assemblies 19, 20 and 21	DIS3	0.166284	0.00284514	82.6535	0.00770189	0.761494	0.168296	0.164272
10457	CUST_11194_PI362308700	orf19.3532	MRPL10	Ca21chr2_C_albicans_SC5314	1041938	Predicted ORF in Assemblies 19, 20 and 21; shows colony morphology-related gene regulation by Ssn6p	MRPL10	0.339054	0.0114902	41.7306	0.0152525	0.806017	0.330929	0.347179
10499	CUST_53_PI362308700	orf19.2949	0	Ca21chr1_C_albicans_SC5314	545079	Predicted ORF in Assemblies 19, 20 and 21	IML1	0.292978	0.000960021	431.589	0.00147506	0.82201	0.2923	0.293657
10518	CUST_434_PI362308700	orf19.3282	BMT3	Ca21chrR_C_albicans_SC5314	174635	Putative beta-mannosyltransferase, required for addition of the 2nd beta-mannose to the acid-stable fraction of cell wall phosphopeptidomannan and for elongation of beta-mannose chains on the phosphopeptidomannan acid-labile fraction	0	1.02222	0.0848104	17.0455	0.0373054	0.799588	0.962251	1.08219
10541	CUST_3561_PI362308700	orf19.4775	CTA8	Ca21chr1_C_albicans_SC5314	2010391	Essential transcription factor, mediates heat shock transcriptional induction; in the absence of heat stress, Cta8p levels are modulated by growth temperature to regulate basal expression of genes involved in protein folding	HSF1	0.549844	0.0349464	22.2511	0.0285914	0.796662	0.525133	0.574555
10578	CUST_10654_PI362308700	orf19.4482	IFI3	Ca21chr1_C_albicans_SC5314	854018	Predicted ORF in Assemblies 19, 20 and 21; constitutive expression independent of MTL or white-opaque status	0	-1.13324	0.0230962	69.3896	0.00917394	0.759949	-1.14957	-1.1169
10626	CUST_5216_PI362308700	orf19.1426	0	Ca21chr4_C_albicans_SC5314	907123	Predicted ORF in Assemblies 19, 20 and 21	0	0.488985	0.0281268	24.5861	0.0258792	0.793198	0.508874	0.469097
10635	CUST_1719_PI362308700	orf19.286	0	Ca21chr3_C_albicans_SC5314	626060	Decreased transcription is observed upon fluphenazine treatment; possibly spurious ORF (Annotation Working Group prediction)	0	0.57848	0.0306077	26.7284	0.023807	0.801851	0.600123	0.556837
10637	CUST_3446_PI362308700	orf19.5852	0	Ca21chrR_C_albicans_SC5314	1171268	Predicted ORF in Assemblies 19, 20 and 21	0	0.133484	0.00392784	48.0607	0.0132443	0.773212	0.136261	0.130707
10646	CUST_947_PI362308700	orf19.7001	YCK2	Ca21chr3_C_albicans_SC5314	1263829	Plasma membrane protein similar to S. cerevisiae casein kinase I, Yck2p; null mutant has defect in damaging oral epithelial cells and in hyphal branching; transcription is activated in weak acid stress or on contact with host cells	YCK2	0.204899	0.00484015	59.868	0.0106327	0.794862	0.201476	0.208321
10666	CUST_10051_PI362308700	orf19.1034	0	Ca21chr1_C_albicans_SC5314	784529	Predicted ORF in Assemblies 19, 20 and 21; caspofungin repressed	DAP1	-0.969311	0.0633878	21.6258	0.029417	0.789174	-0.924489	-1.01413
10668	CUST_11045_PI362308700	orf19.3559	0	Ca21chr2_C_albicans_SC5314	1093099	Predicted ORF in Assemblies 19, 20 and 21	MRPS35	0.489434	0.00596372	116.063	0.005485	0.755575	0.493651	0.485217
10702	CUST_8532_PI362308700	orf19.3338	0	Ca21chr1_C_albicans_SC5314	300397	Predicted ORF in Assemblies 19, 20 and 21	0	0.594471	0.0443233	18.9676	0.0335324	0.790591	0.625812	0.563129
10730	CUST_591_PI362308700	orf19.3797	0	Ca21chr4_C_albicans_SC5314	1037061	Predicted ORF in Assemblies 19, 20 and 21	MRPL11	0.733083	0.0711065	14.5801	0.0435955	0.789484	0.682803	0.783363
10755	CUST_1129_PI362308700	orf19.7210	0	Ca21chr1_C_albicans_SC5314	3090053	Predicted ORF in Assemblies 19, 20 and 21	YJR008W	0.597413	0.0613398	13.7736	0.0461393	0.794478	0.554039	0.640787
10757	CUST_10715_PI362308700	orf19.6640	TPS1	Ca21chrR_C_albicans_SC5314	1213719	Trehalose-6-phosphate synthase; role in hyphal growth and virulence in mouse systemic infection; upregulated in presence of human neutrophils; macrophage/pseudohyphal-repressed after 16h; detected by mass spec in stationary phase cultures	TPS1	-1.05398	0.0929984	16.0278	0.0396684	0.799893	-0.988223	-1.11974
10762	CUST_6808_PI362308700	orf19.4241	0	Ca21chr5_C_albicans_SC5314	515686	Predicted ORF in Assemblies 19, 20 and 21; transcription detected in high-resolution tiling array experiments	0	0.770075	0.0222201	49.012	0.0129873	0.784354	0.754363	0.785787
10777	CUST_3437_PI362308700	orf19.5856	0	Ca21chr3_C_albicans_SC5314	863514	Predicted ORF in Assemblies 19, 20 and 21; possibly spurious ORF (Annotation Working Group prediction)	0	0.502771	0.0514056	13.8317	0.0459463	0.795623	0.466422	0.53912
10830	CUST_8125_PI362308700	orf19.6720	0	Ca21chr3_C_albicans_SC5314	1748342	Predicted ORF in Assemblies 19, 20 and 21; similar to S. cerevisiae Ydr090cp; transposon mutation affects filamentous growth	YDR090C	-0.475018	0.0169241	39.6934	0.016035	0.802405	-0.463051	-0.486985
10832	CUST_12169_PI362308700	orf19.6874	0	Ca21chr2_C_albicans_SC5314	1150098	Predicted ORF in Assemblies 19, 20 and 21	BAS1	1.12457	0.0305966	51.979	0.0122461	0.80719	1.1462	1.10293
10833	CUST_9134_PI362308700	orf19.3099	TRP4	Ca21chr4_C_albicans_SC5314	1567955	Predicted enzyme of amino acid biosynthesis; upregulated in biofilm; regulated by Gcn2p and Gcn4p; S. cerevisiae ortholog is Gcn4p regulated	TRP4	-1.17876	0.0564828	29.5137	0.021562	0.803497	-1.13882	-1.2187
10841	CUST_5172_PI362308700	orf19.3613	0	Ca21chr2_C_albicans_SC5314	1757141	Predicted ORF in Assemblies 19, 20 and 21	PAF1	1.45206	0.0225445	91.0877	0.0069888	0.793359	1.43612	1.46801
10879	CUST_7949_PI362308700	orf19.4839	0	Ca21chr1_C_albicans_SC5314	2139855	Predicted ORF in Assemblies 19, 20 and 21; decreased expression observed in an ssr1 homozygous null mutant	GET2	0.559857	0.0526695	15.0326	0.0422871	0.789101	0.522614	0.5971
10883	CUST_11867_PI362308700	orf19.7136	SPT6	Ca21chr7_C_albicans_SC5314	934914	Protein similar to S. cerevisiae Spt6p transcription elongation factor; transposon mutation affects filamentous growth; transcription is upregulated in an RHE model of oral candidiasis and in clinical isolates from oral candidiasis	SPT6	0.450348	0.048289	13.1891	0.0481765	0.788576	0.484494	0.416203
10898	CUST_10954_PI362308700	orf19.7479	NTH1	Ca21chrR_C_albicans_SC5314	130650	Neutral trehalase; hyphal induction in homozygous null mutant is delayed but not reduced overall; not required for virulence in mouse systemic infection; homodimeric enzyme; possible regulatory cAMP-dependent phosphorylation at S10 and S213	NTH1	-1.09219	0.0783798	19.7064	0.0322775	0.789864	-1.14761	-1.03677
10933	CUST_8784_PI362308700	orf19.4412	0	Ca21chr4_C_albicans_SC5314	1337960	Predicted ORF in Assemblies 19, 20 and 21	REV1	-0.124259	0.00910405	19.3022	0.0329523	0.789053	-0.117821	-0.130696
10976	CUST_3466_PI362308700	orf19.3672	GAL10	Ca21chr1_C_albicans_SC5314	452186	UDP-glucose 4-epimerase, required for galactose utilization; mutant shows cell wall defects and increased filamentation; fluconazole-induced; protein detected by mass spec in stationary phase cultures	GAL10	1.8748	0.183662	14.4361	0.0440289	0.794984	2.00467	1.74493
10978	CUST_4919_PI362308700	orf19.251	0	Ca21chr3_C_albicans_SC5314	565949	ThiJ/PfpI protein family; antigenic (Cand a 3 allergen); binds human immunoglobulin E; 2 N-glycosylation motifs; alkaline, fluconazole, Hog1p-downregulated; induced in core stress response or by oxidative stress (via Cap1p)	HSP31	0.789999	0.0868987	12.8567	0.0494172	0.788874	0.728553	0.851446
10999	CUST_4190_PI362308700	orf19.4898	0	Ca21chr1_C_albicans_SC5314	2269357	Predicted ORF in Assemblies 19, 20 and 21; increased expression in response to prostaglandins	FMP52	-1.01028	0.0334941	42.6568	0.0149215	0.805892	-0.986596	-1.03396
11055	CUST_1569_PI362308700	orf19.1305	0	Ca21chr4_C_albicans_SC5314	795450	Predicted ORF in Assemblies 19, 20 and 21	TRM5	1.57948	0.0180435	123.797	0.00514235	0.750538	1.59224	1.56672
11109	CUST_5990_PI362308700	orf19.4733	YMC2	Ca21chr1_C_albicans_SC5314	1907576	Predicted ORF in Assemblies 19, 20 and 21; Gcn4p-regulated; induced upon biofilm formation	YMC1	-0.572906	0.00748212	108.286	0.00587887	0.783424	-0.567615	-0.578196
11126	CUST_5277_PI362308700	orf19.6291	0	Ca21chrR_C_albicans_SC5314	1651031	Predicted ORF in Assemblies 19, 20 and 21	FUN30	-0.858578	0.0225462	53.8543	0.0118198	0.805059	-0.842636	-0.874521
11136	CUST_1123_PI362308700	orf19.1913	0	Ca21chr2_C_albicans_SC5314	12627	Predicted ORF in Assemblies 19, 20 and 21	0	0.454817	0.0364433	17.6496	0.0360315	0.798817	0.429047	0.480586
11140	CUST_10175_PI362308700	orf19.4964	0	Ca21chr1_C_albicans_SC5314	2916611	Predicted ORF in Assemblies 19, 20 and 21	BUD13	-0.0585676	0.000736129	112.517	0.00565783	0.762253	-0.0590881	-0.0580471
11207	CUST_1709_PI362308700	orf19.7393	0	Ca21chr3_C_albicans_SC5314	1392924	Predicted ORF in Assemblies 19, 20 and 21	UTR1	0.447799	0.0182702	34.662	0.0183614	0.803968	0.43488	0.460718
11213	CUST_8022_PI362308700	orf19.4818	0	Ca21chr1_C_albicans_SC5314	2102705	Predicted ORF in Assemblies 19, 20 and 21	0	-0.113891	0.0114352	14.0851	0.0451225	0.79483	-0.105805	-0.121977
11244	CUST_5930_PI362308700	orf19.5677	DUR4	Ca21chr4_C_albicans_SC5314	81578	Putative urea permease; fungal-specific (no human or murine homolog); possibly an essential gene, disruptants not obtained by UAU1 method	DUR3	0.183883	0.0192176	13.5319	0.0469605	0.790846	0.170294	0.197472
11255	CUST_2377_PI362308700	orf19.3029	0	Ca21chr1_C_albicans_SC5314	693400	Predicted ORF in Assemblies 19, 20 and 21	EHD3	-0.45976	0.0357428	18.1911	0.0349611	0.793746	-0.434486	-0.485034
11265	CUST_6436_PI362308700	orf19.5365	0	Ca21chr2_C_albicans_SC5314	2221049	Predicted ORF in Assemblies 19, 20 and 21; decreased transcription is observed upon fluphenazine treatment or in an azole-resistant strain that overexpresses CDR1 and CDR2	YMR259C	0.492828	0.0462264	15.0772	0.0421623	0.790382	0.525515	0.460141
11280	CUST_7420_PI362308700	orf19.3752	RAD51	Ca21chrR_C_albicans_SC5314	485125	Protein involved in homologous recombination and DNA repair; flucytosine induced; slow growth and increased white-to-opaque switching frequency in null mutant	RAD51	-0.806182	0.0326582	34.9105	0.0182308	0.803991	-0.783089	-0.829274
11284	CUST_6899_PI362308700	orf19.2048	0	Ca21chr2_C_albicans_SC5314	131488	Transcription is positively regulated by Sfu1p	0	-2.70595	0.106391	35.9692	0.0176945	0.800494	-2.63072	-2.78118
11285	CUST_9890_PI362308700	orf19.2761	0	Ca21chr4_C_albicans_SC5314	488449	Putative protein of unknown function; transposon insertion causes decreased colony wrinkling but does not block true hyphal growth; induced by nitric oxide in yhb1 mutant; possibly spurious ORF (Annotation Working Group prediction)	GPI11	0.647217	0.0103331	88.5798	0.00718666	0.786683	0.654524	0.639911
11310	CUST_11837_PI362308700	orf19.1850	SIW14	Ca21chrR_C_albicans_SC5314	1464400	Putative protein phosphatase of the PTP family (tyrosine-specific), similar to S. cerevisiae Siw14p; mutant shows virulence defect	SIW14	0.267986	0.017128	22.1269	0.0287518	0.797505	0.255874	0.280097
11320	CUST_11120_PI362308700	orf19.5722	0	Ca21chr6_C_albicans_SC5314	755643	Predicted ORF in Assemblies 19, 20 and 21	YDR026C	-0.345888	0.00626199	78.1158	0.00814925	0.76267	-0.341461	-0.350316
11347	CUST_665_PI362308700	orf19.3453	0	Ca21chr6_C_albicans_SC5314	444675	Predicted ORF in Assemblies 19, 20 and 21	0	-0.330456	0.0098624	47.3855	0.0134329	0.773181	-0.337429	-0.323482
11364	CUST_1243_PI362308700	orf19.5004	RAD54	Ca21chr1_C_albicans_SC5314	3003486	Protein similar to S. cerevisiae Rad54p, which is a DNA-dependent ATPase involved in DNA repair; induced under hydroxyurea treatment	RAD54	-0.622317	0.0105176	83.6776	0.00760764	0.764506	-0.629754	-0.61488
11369	CUST_2553_PI362308700	orf19.3405	ZCF18	Ca21chr6_C_albicans_SC5314	378225	Putative transcription factor with zinc finger DNA-binding motif; heterozygous null mutant displays sensitivity to virgineone; possibly spurious ORF (Annotation Working Group prediction)	LYS14	-0.501557	0.00535233	132.523	0.00480374	0.764856	-0.505342	-0.497772
11372	CUST_3819_PI362308700	orf19.2092	0	Ca21chr2_C_albicans_SC5314	56710	Predicted ORF in Assemblies 19, 20 and 21; Gcn4p-regulated	STR3	-0.856674	0.0616187	19.6616	0.032351	0.790087	-0.813103	-0.900245
11392	CUST_2902_PI362308700	orf19.2400	0	Ca21chrR_C_albicans_SC5314	724234	Predicted ORF in Assemblies 19, 20 and 21	SQS1	-0.741739	0.0774969	13.5357	0.0469472	0.79171	-0.796538	-0.686941
11400	CUST_5538_PI362308700	orf19.1852	0	Ca21chrR_C_albicans_SC5314	1462928	Predicted ORF in Assemblies 19, 20 and 21	AIM19	-0.36946	0.0358105	14.5905	0.0435643	0.790085	-0.394781	-0.344138
11422	CUST_5520_PI362308700	orf19.1857	0	Ca21chrR_C_albicans_SC5314	1454635	Protein not essential for viability	SPT10	-0.72608	0.0646926	15.8725	0.0400554	0.797207	-0.771825	-0.680336
11425	CUST_3557_PI362308700	orf19.4777	DAK2	Ca21chr1_C_albicans_SC5314	2019470	Protein described as similar to dihydroxyacetone kinase; transcription is decreased upon yeast-hyphal switch; fluconazole-induced; caspofungin repressed; protein detected by mass spec in stationary phase cultures	DAK2	-1.28522	0.132063	13.763	0.0461747	0.793971	-1.19184	-1.37861
11438	CUST_12101_PI362308700	orf19.5117	OLE1	Ca21chr1_C_albicans_SC5314	1835814	Fatty acid desaturase (stearoyl-CoA desaturase), essential protein involved in oleic acid synthesis; required for aerobic hyphal growth and chlamydospore formation; subject to hypoxic regulation; fluconazole-induced; caspofungin repressed	OLE1	-0.245729	0.0167246	20.7786	0.0306146	0.788519	-0.257555	-0.233903
11476	CUST_4755_PI362308700	orf19.6008	0	Ca21chr3_C_albicans_SC5314	1166751	Predicted ORF in Assemblies 19, 20 and 21; transcription is repressed in response to alpha pheromone in SpiderM medium	YLL032C	-1.21186	0.0586913	29.2008	0.0217929	0.807194	-1.17036	-1.25336
11482	CUST_5630_PI362308700	orf19.4624	HRT2	Ca21chr4_C_albicans_SC5314	336398	Protein described as having a role in Ty3 transposition; decreased expression in hyphae compared to yeast-form cells; protein detected by mass spec in stationary phase cultures	YMR027W	-0.905177	0.0735805	17.3975	0.0365525	0.80167	-0.957206	-0.853148
11508	CUST_6176_PI362308700	orf19.4093	PES1	Ca21chr2_C_albicans_SC5314	1902937	Pescadillo homolog required for filament-to-yeast switching; mutation confers hypersensitivity to 5-fluorocytosine (5-FC), 5-fluorouracil (5-FU), and tubercidin (7-deazaadenosine)	NOP7	1.70012	0.0746901	32.1908	0.0197701	0.81064	1.64731	1.75294
11521	CUST_6793_PI362308700	orf19.4246	0	Ca21chr5_C_albicans_SC5314	529708	Protein with similarity to S. cerevisiae Ykr070wp; transposon mutation affects filamentous growth; Hog1p-downregulated; shows colony morphology-related gene regulation by Ssn6p; induced during cell wall regeneration; possibly essential gene	YKR070W	-0.754566	0.0457319	23.3342	0.027266	0.790263	-0.722229	-0.786904
11534	CUST_5760_PI362308700	orf19.6139	FRE7	Ca21chrR_C_albicans_SC5314	1587228	Protein similar to ferric reductase Fre10p; transcription is downregulated in response to treatment with ciclopirox olamine or 17-beta-estradiol; transcriptionally induced by alkaline conditions or interaction with macrophage	FRE3	1.65619	0.0711086	32.9383	0.0193217	0.816841	1.6059	1.70647
11565	CUST_11987_PI362308700	orf19.6698	0	Ca21chr7_C_albicans_SC5314	811253	Predicted ORF in Assemblies 19, 20 and 21	SLM5	-0.393092	0.00212266	261.895	0.0024308	0.764145	-0.394593	-0.391591
11578	CUST_184_PI362308700	orf19.6035	0	Ca21chr1_C_albicans_SC5314	123067	Predicted ORF in Assemblies 19, 20 and 21; repressed by nitric oxide	0	0.514906	0.00445787	163.349	0.00389726	0.79634	0.518058	0.511754
11586	CUST_8771_PI362308700	orf19.2241	PST1	Ca21chr2_C_albicans_SC5314	1413266	Protein described as 1,4-benzoquinone reductase; biofilm induced; hyphal-induced expression, regulated by Cyr1p, Ras1p, Efg1p, Nrg1p, Rfg1p, Tup1p	PST2	0.354447	0.0190224	26.3513	0.0241474	0.789459	0.367898	0.340996
11604	CUST_4798_PI362308700	orf19.685	YHM1	Ca21chr6_C_albicans_SC5314	397098	Putative mitochondrial carrier protein; fungal-specific (no human or murine homolog)	GGC1	0.541977	0.0594523	12.8922	0.0492816	0.789793	0.584016	0.499938
11615	CUST_3340_PI362308700	orf19.3698	0	Ca21chr7_C_albicans_SC5314	567256	Predicted ORF in Assemblies 19, 20 and 21; filament induced	0	-0.318536	0.0317537	14.1866	0.0448005	0.79602	-0.340989	-0.296083
11618	CUST_8356_PI362308700	orf19.6316.4	0	Ca21chrR_C_albicans_SC5314	1032134	ORF Predicted by Annotation Working Group	YLR363W-A	1.25813	0.0939894	18.9305	0.0335981	0.789104	1.32459	1.19167
11646	CUST_8802_PI362308700	orf19.2230	0	Ca21chr2_C_albicans_SC5314	1392405	Decreased transcription is observed upon benomyl treatment	RDS3	0.615402	0.0576604	15.0937	0.0421163	0.790728	0.57463	0.656174
11660	CUST_11438_PI362308700	orf19.537	0	Ca21chrR_C_albicans_SC5314	987660	Predicted ORF in Assemblies 19, 20 and 21	0	-0.104736	0.0050745	29.1888	0.0218019	0.805092	-0.101148	-0.108324
11663	CUST_6125_PI362308700	orf19.2518	0	Ca21chrR_C_albicans_SC5314	325382	Predicted ORF in Assemblies 19, 20 and 21	SEC17	-0.493023	0.0160724	43.3811	0.0146724	0.803054	-0.504388	-0.481658
11697	CUST_10161_PI362308700	orf19.2791	BBC1	Ca21chr1_C_albicans_SC5314	1634762	Putative SH3-domain-containing protein; Predicted ORF in Assemblies 19, 20 and 21	BBC1	-0.490498	0.040841	16.9846	0.0374389	0.798264	-0.519377	-0.461619
11754	CUST_8546_PI362308700	orf19.3333	0	Ca21chr1_C_albicans_SC5314	288046	Predicted ORF in Assemblies 19, 20 and 21	NAB2	0.249978	0.0136675	25.866	0.0246	0.783366	0.259643	0.240314
11755	CUST_11986_PI362308700	orf19.6699	0	Ca21chr7_C_albicans_SC5314	811518	Predicted ORF in Assemblies 19, 20 and 21	HIS2	-0.984874	0.0894501	15.5709	0.040829	0.798348	-1.04812	-0.921623
11766	CUST_3714_PI362308700	orf19.50	0	Ca21chr1_C_albicans_SC5314	1035890	Predicted ORF in Assemblies 19, 20 and 21	UFO1	-1.11062	0.0314298	49.9735	0.0127374	0.776921	-1.0884	-1.13285
11819	CUST_5685_PI362308700	orf19.2432	HAC1	Ca21chr1_C_albicans_SC5314	1285460	Putative transcription factor involved in unfolded protein response and control of morphology; transcript undergoes atypical splicing at C terminus under ER stress; induced during mating and by caspofungin; mRNA binds She3p	HAC1	0.958086	0.0568695	23.8254	0.0267046	0.800484	0.998299	0.917873
11841	CUST_10824_PI362308700	orf19.4442	ALG9	Ca21chr1_C_albicans_SC5314	1555985	Putative mannosyltransferase; similar to S. cerevisiae Alg9p; has HKEXRF motif	ALG9	-0.391645	0.0114904	48.2027	0.0132052	0.782108	-0.39977	-0.38352
11855	CUST_11009_PI362308700	orf19.7463	0	Ca21chrR_C_albicans_SC5314	164523	Predicted ORF in Assemblies 19, 20 and 21	RRT12	-0.0447065	7.89147e-05	801.176	0.000794606	0.885625	-0.0446507	-0.0447623
11880	CUST_1580_PI362308700	orf19.1300	0	Ca21chr4_C_albicans_SC5314	802162	Putative protein of unknown function; homozygous transposon insertion causes decreased colony wrinkling under filamentous growth-inducing conditions, but does not block true hyphal formation in liquid media	OMS1	0.44287	0.0441821	14.1757	0.0448349	0.794329	0.411629	0.474111
11883	CUST_9096_PI362308700	orf19.354	0	Ca21chr3_C_albicans_SC5314	755916	Predicted ORF in Assemblies 19, 20 and 21	ICP55	-0.0680868	0.00496239	19.4038	0.03278	0.791108	-0.0715957	-0.0645778
11908	CUST_5456_PI362308700	orf19.7176	NPT1	Ca21chr7_C_albicans_SC5314	879887	Putative nicotinate phosphoribosyltransferase, involved in NAD salvage pathway; fungal-specific (no human or murine homolog)	NPT1	0.0982498	0.0108632	12.7906	0.0496714	0.790872	0.0905684	0.105931
11939	CUST_2064_PI362308700	orf19.7030	SSR1	Ca21chr7_C_albicans_SC5314	171720	Beta-glucan associated cell-wall protein with role in cell wall structure; S/T rich protein, GPI anchor; similar mRNA abundance in yeast-form and germ tube; detected at germ tube plasma membrane by mass spec; similar to S. cerevisiae Ssr1p	CCW14	0.375407	0.0209869	25.297	0.0251527	0.790698	0.360567	0.390247
11942	CUST_11028_PI362308700	orf19.815	DCK1	Ca21chr2_C_albicans_SC5314	853403	Putative guanine nucleotide exchange factor required for embedded filamentous growth; activates Rac1p; contains a DOCKER domain; similar to adjacent DCK2 and to S. cerevisiae Ylr422wp; regulated by Nrg1p	YLR422W	0.995254	0.00663969	211.983	0.00300314	0.800402	0.990559	0.999949
11963	CUST_11945_PI362308700	orf19.7109	0	Ca21chr7_C_albicans_SC5314	18851	Predicted ORF in Assemblies 19, 20 and 21	YGL242C	-0.286236	0.0208499	19.4149	0.0327613	0.792216	-0.300979	-0.271493
11964	CUST_11271_PI362308700	orf19.918	CDR11	Ca21chr3_C_albicans_SC5314	853314	Putative transporter of PDR subfamily of ABC family; Gcn4p-regulated; upregulated by Rim101p at pH 8	PDR5	1.07642	0.0323753	47.0199	0.0135373	0.771942	1.05352	1.09931
11975	CUST_2597_PI362308700	orf19.1203	SRO77	Ca21chr6_C_albicans_SC5314	73882	Predicted ORF in Assemblies 19, 20 and 21; filament induced; fungal-specific (no human or murine homolog)	SRO77	-0.426747	0.00483256	124.884	0.00509756	0.762148	-0.42333	-0.430164
12012	CUST_538_PI362308700	orf19.5994	RHB1	Ca21chr3_C_albicans_SC5314	1126577	Putative small G protein from the Ras superfamily involved in cell wall integrity and control of filamentous growth under nitrogen starvation	RHB1	0.27687	0.00727931	53.7899	0.0118339	0.801569	0.282017	0.271723
12013	CUST_5264_PI362308700	orf19.410.3	0	Ca21chr1_C_albicans_SC5314	1166924	Lumazine synthase (6,7-dimethyl-8-ribityllumazine synthase, DMRL synthase); catalyzes the penultimate step in the synthesis of riboflavin	RIB4	-0.19761	0.0171937	16.2538	0.0391182	0.806032	-0.209768	-0.185453
12017	CUST_4217_PI362308700	orf19.4883	0	Ca21chr1_C_albicans_SC5314	2220202	Predicted ORF in Assemblies 19, 20 and 21; constitutive expression independent of MTL or white-opaque status	COS111	-0.554809	0.00113944	688.6	0.000924513	0.809609	-0.554003	-0.555615
12047	CUST_2954_PI362308700	orf19.1990	SNX4	Ca21chr2_C_albicans_SC5314	234442	Protein induced during the mating process	SNX4	-0.092701	0.0055963	23.426	0.0271592	0.792791	-0.0887438	-0.0966582
12054	CUST_6140_PI362308700	orf19.2510	0	Ca21chr3_C_albicans_SC5314	219972	Predicted ORF in Assemblies 19, 20 and 21	CIN1	-0.269291	0.0078904	48.2656	0.013188	0.78488	-0.263712	-0.27487
12063	CUST_3781_PI362308700	orf19.6453	0	Ca21chr7_C_albicans_SC5314	548612	Predicted ORF in Assemblies 19, 20 and 21	0	0.198908	0.0169031	16.6418	0.0382084	0.799377	0.21086	0.186955
12087	CUST_2568_PI362308700	orf19.3400	COQ3	Ca21chr6_C_albicans_SC5314	383593	Protein described as having role in coenzyme Q biosynthesis; transcriptionally induced by interaction with macrophage; possibly an essential gene, disruptants not obtained by UAU1 method	COQ3	-0.348644	0.0349406	14.1113	0.0450388	0.794498	-0.323937	-0.373351
12093	CUST_11889_PI362308700	orf19.1848.1	0	Ca21chrR_C_albicans_SC5314	1467472	ORF Predicted by Annotation Working Group	KSH1	0.367572	0.000417717	1244.44	0.00051157	0.696873	0.367867	0.367277
12110	CUST_10194_PI362308700	orf19.2785	ATP7	Ca21chr1_C_albicans_SC5314	1645704	Putative subunit of the F1F0-ATPase complex; shows colony morphology-related gene regulation by Ssn6p; farnesol-, macrophage-downregulated protein abundance	ATP7	0.313248	0.0226773	19.5349	0.0325604	0.792045	0.297212	0.329283
12121	CUST_9982_PI362308700	orf19.4910	FGR41	Ca21chr1_C_albicans_SC5314	2302038	Putative GPI-anchored protein; transposon mutation affects filamentous growth; possibly spurious ORF (Annotation Working Group prediction)	0	0.483855	0.00372079	183.906	0.00346163	0.816146	0.486486	0.481224
12132	CUST_1828_PI362308700	orf19.260	SLD1	Ca21chr3_C_albicans_SC5314	580398	Sphingolipid delta-8 desaturase, catalyzes desaturation at carbon-8 in the long-chain base moiety of ceramides during glucosylceramide synthesis, which is important for virulence	0	-0.899473	0.0341529	37.2456	0.0170884	0.808893	-0.923623	-0.875323
12157	CUST_477_PI362308700	orf19.2030	0	Ca21chr2_C_albicans_SC5314	155824	Predicted ORF in Assemblies 19, 20 and 21; greater mRNA abundance observed in a cyr1 or ras1 homozygous null mutant than in wild type; expression upregulated during growth in the mouse cecum	0	0.416598	0.0114104	51.6335	0.0123281	0.799693	0.424667	0.40853
12170	CUST_1423_PI362308700	orf19.57	PSF2	Ca21chr1_C_albicans_SC5314	1054857	Predicted ORF in Assemblies 19, 20 and 21	PSF2	0.255956	0.0177195	20.4281	0.031139	0.782304	0.268485	0.243426
12172	CUST_1220_PI362308700	orf19.5016	0	Ca21chr1_C_albicans_SC5314	3031406	Protein not essential for viability	YAL044W-A	-0.172863	0.00129795	188.346	0.00338002	0.81253	-0.171945	-0.173781
12178	CUST_11845_PI362308700	orf19.1847	ARO10	Ca21chrR_C_albicans_SC5314	1469568	Aromatic decarboxylase of the Ehrlich fusel oil pathway of aromatic alcohol biosynthesis; pH-regulated (alkaline downregulated); protein abundance is affected by URA3 expression in the CAI-4 strain background	ARO10	1.06938	0.0810851	18.6512	0.0341003	0.787326	1.01204	1.12672
12199	CUST_9057_PI362308700	orf19.3221	CPA2	Ca21chrR_C_albicans_SC5314	318330	Predicted ORF in Assemblies 19, 20 and 21; protein detected by mass spec in stationary phase cultures; transcription is upregulated in both intermediate and mature biofilms	CPA2	-0.356822	0.0122357	41.2419	0.0154332	0.798359	-0.365474	-0.34817
12200	CUST_11639_PI362308700	orf19.5431	0	Ca21chr3_C_albicans_SC5314	51706	Predicted ORF in Assemblies 19, 20 and 21	0	1.65733	0.0867053	27.032	0.0235399	0.806142	1.71864	1.59602
12242	CUST_9875_PI362308700	orf19.4941	TYE7	Ca21chr1_C_albicans_SC5314	2869829	Transcription factor with bHLH (basic region, helix-loop-helix) motif involved in control of glycolysis; hyphally regulated via Cph1p, Cyr1p; flucytosine, Hog1p induced; amphotericin B, caspofungin repressed	TYE7	0.539373	0.00274511	277.872	0.00229105	0.802521	0.537432	0.541314
12246	CUST_8013_PI362308700	orf19.2642	0	Ca21chr5_C_albicans_SC5314	764706	Predicted ORF in Assemblies 19, 20 and 21	0	0.77116	0.0501972	21.726	0.0292815	0.79073	0.806654	0.735665
